# Supplementary material for: Reactions of N-heterocyclic carbene-based chalcogenoureas with halogens: a diverse range of outcomes
Source: Royal Society of Chemistry journal article supplement (doi:10.1039/d2dt00010e), 2022-01-01
Supplement: d2dt00010e1.pdf [file d2dt00010e1.pdf]

SUPPORTING INFORMATION FOR

## Reactions of *N*-heterocyclic Carbene-Based Chalcogenoureas with Halogens: A Diverse Range of Outcomes

Marina Saab,<sup>a</sup> David J. Nelson,<sup>b</sup> Matthew Leech,<sup>c</sup> Kevin Lam,<sup>c</sup> Steven P. Nolan,<sup>d</sup> Fady Nahra<sup>\*a,e</sup> and Kristof Van Hecke<sup>\*a</sup>

---

<sup>a</sup> XStruct, Department of Chemistry, Ghent University, Krijgslaan 281, Building S3, 9000 Ghent, Belgium. [Kristof.VanHecke@UGent.be](mailto:Kristof.VanHecke@UGent.be)

<sup>b</sup> WestCHEM Department of Pure & Applied Chemistry, University of Strathclyde, 295 Cathedral Street, Glasgow, G1 1XL, Scotland.

<sup>c</sup> School of Science, University of Greenwich, Chatham Maritime ME4 4TB, UK.

<sup>d</sup> Department of Chemistry, Ghent University, Krijgslaan 281, Building S3, 9000 Ghent, Belgium.

<sup>e</sup> VITO (Flemish Institute for Technological Research), Boeretang 200, 2400 Mol, Belgium. [Fady.Nahra@Vito.be](mailto:Fady.Nahra@Vito.be)

### Contents

|                                                                                   |   |
|-----------------------------------------------------------------------------------|---|
| Cyclic voltammograms of [S(NHC)] scanned in the negative cathodic direction ..... | 2 |
| Experimental section .....                                                        | 3 |
| General Information .....                                                         | 3 |
| General procedure for the synthesis of NHC-based dibromo-chalcogenoureas .....    | 3 |
| <b>Dibromo-selenoureas</b> .....                                                  | 3 |
| <b>Dibromo-thioureas</b> .....                                                    | 4 |
| General procedure for the synthesis of NHC-based dichloro-chalcogenoureas .....   | 5 |
| <b>Dichloro-selenoureas</b> .....                                                 | 5 |
| General procedure for the synthesis of NHC-based diiodo-chalcogenoureas .....     | 6 |
| <b>Diiodo-selenoureas</b> .....                                                   | 6 |
| <b>Diiodo-thioureas</b> .....                                                     | 7 |
| NMR spectra .....                                                                 | 9 |

## Cyclic voltammograms of [S(NHC)] scanned in the negative cathodic direction

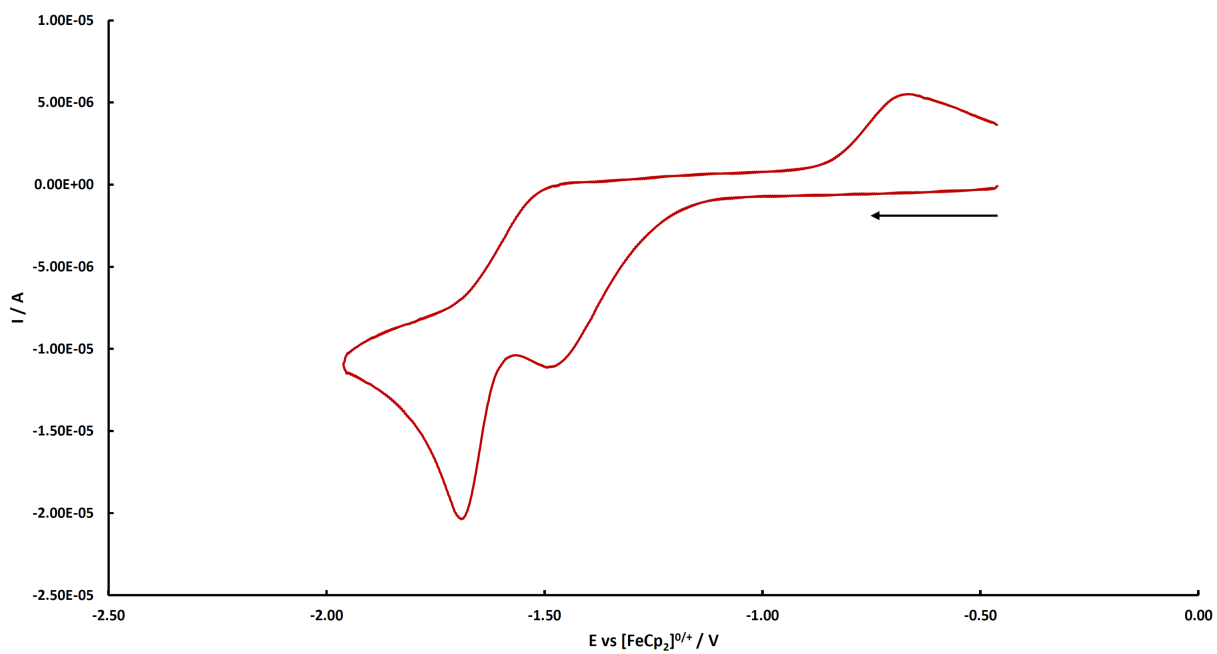

Figure S1. Cyclic voltammogram of [S(ICy)] scanned in the negative direction.

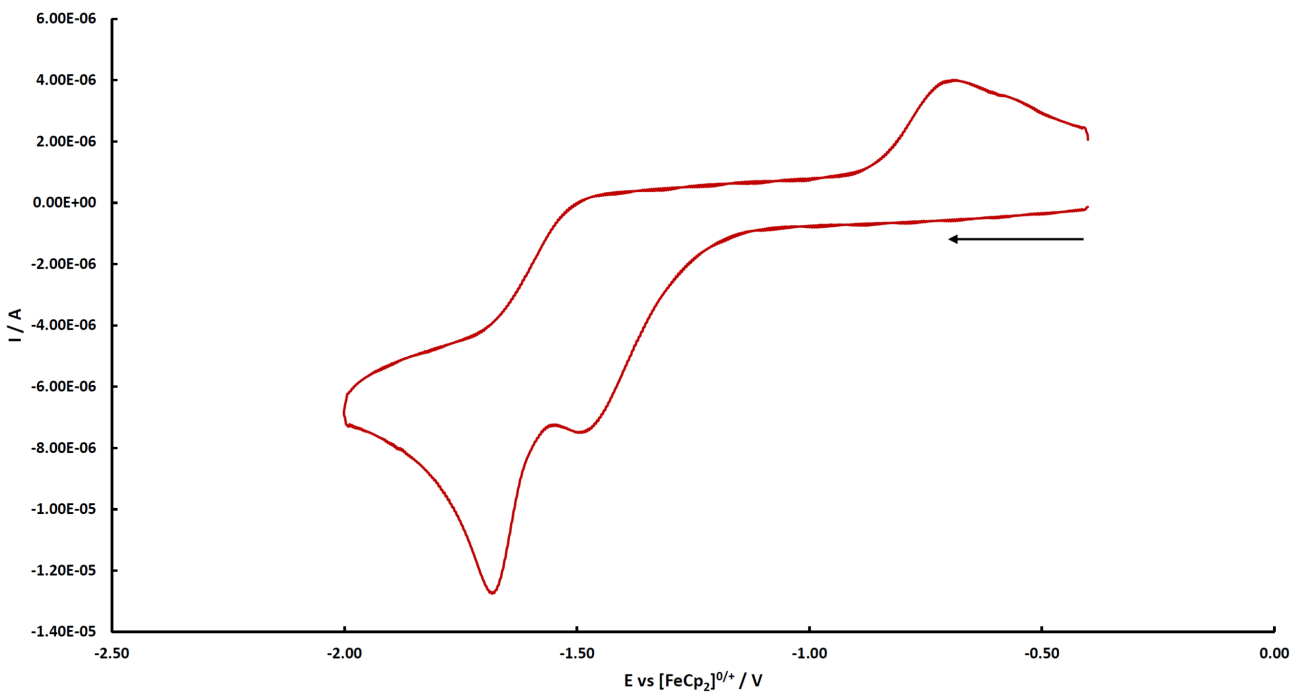

Figure S2. Cyclic voltammogram of [S(IPr\*)] scanned in the negative direction.

## Experimental section

### General Information

NMR spectra were acquired on a Bruker AV3-400 spectrometer equipped with a liquid nitrogen cryoprobe, a Bruker AV400 spectrometer with a BBFO-z-ATMA probe or a Bruker Avance II 500MHz equipped with a 5mm triple channel probe head (TXO type).  $^1\text{H}$  NMR spectra were referenced to residual solvent signals and  $^{13}\text{C}\{^1\text{H}\}$  NMR spectra to the deuterated solvent signal, while chemical shifts are reported in ppm.  $^{77}\text{Se}$  NMR spectra were referenced to external standards.  $[\text{}^1\text{H}, \text{}^1\text{H}]$  COSY,  $[\text{}^1\text{H}, \text{}^{13}\text{C}]$  HSQC and  $[\text{}^1\text{H}, \text{}^{13}\text{C}]$  HMBC spectra were used to assign signals. X-ray intensity data were collected at 100 K, on a Rigaku Oxford Diffraction Supernova Dual Source (Cu at zero) diffractometer equipped with an Atlas CCD detector using  $\omega$  scans and Cu  $K\alpha$  ( $\lambda = 1.54184 \text{ \AA}$ ) radiation. The images were interpreted and integrated with the program CrysAlisPro. Using Olex the structures were solved by direct methods using the ShelXS/T structure solution program and refined by full-matrix least-squares on  $F^2$  using the ShelXL program package. Non-hydrogen atoms were anisotropically refined and the hydrogen atoms in the riding mode with isotropic temperature factors fixed at 1.2 times  $U(\text{eq})$  of the parent atoms (1.5 times for methyl groups). Bromine, Sulfuryl chloride and iodine were obtained from commercial sources and used as supplied. Chalcogenourea NHCs are prepared according to a known procedure.<sup>1</sup> Reagent grade solvents were always used as received unless otherwise stated. Crystallographic data underpinning this study can be downloaded from the Cambridge Structural Database (CSD) via the following link: <https://www.ccdc.cam.ac.uk/structures/> (CCDC 2121842-2121867). See below for more details.

### General procedure for the synthesis of NHC-based dibromo-chalcogenoureas

100 mg of seleno- or thiourea NHCs were dissolved in 3 mL of dichloromethane. 1.2 equiv. of bromine was then added to the solution and the mixture was stirred in an ice bath for 2-3 h. The product was then washed with pentane and dried in the vacuum oven.

#### Dibromo-selenoureas

**[SeBr<sub>2</sub>(IPr)]**: m = 132.8 mg.  $^1\text{H}$  NMR ( $\text{CDCl}_3$ , 400 MHz):  $\delta_{\text{H}}$  7.59 (t, J = 8 Hz, 2H, Ar CH), 7.50 (s, 2H, N(CH)<sub>2</sub>N), 7.40 (d, J = 7.8 Hz, 4H, Ar CH), 2.91 (sept, J = 6.6 Hz, 4H, CHMe<sub>2</sub>), 1.47 (d, J = 6.5 Hz, 12H, CH<sub>3</sub>), 1.13 (d, J = 6.8 Hz, 12H, CH<sub>3</sub>).  $^{13}\text{C}\{^1\text{H}\}$  DEPT Q NMR ( $\text{CDCl}_3$ , 101 MHz):  $\delta_{\text{C}}$  146.1 (Ar C), 142.4 (C-Se), 132.4 (Ar C), 132.0 (Ar CH), 126.3 (N(CH)<sub>2</sub>N), 124.9 (Ar CH), 29.5 (CHMe<sub>2</sub>), 26.5 (CH<sub>3</sub>), 23.4 (CH<sub>3</sub>).  $^{77}\text{Se}$  NMR ( $\text{CDCl}_3$ , 76 MHz):  $\delta_{\text{Se}}$  445.1.

**[SeBr(SIPr)]Br<sub>3</sub>**: m = 132.6 mg.  $^1\text{H}$  NMR ( $\text{CDCl}_3$ , 400 MHz):  $\delta_{\text{H}}$  7.54 (t, J = 7.8 Hz, 2H, Ar CH), 7.32 (d, J = 7.8 Hz, 4H, Ar CH), 4.64 (s, 4H, N(CH<sub>2</sub>)<sub>2</sub>N), 3.13 (sept., J = 6.6 Hz, 4H, CHMe<sub>2</sub>), 1.45 (d, J = 6.7 Hz, 12H, CH<sub>3</sub>), 1.39 (d, J = 6.7 Hz, 12H, CH<sub>3</sub>).  $^{13}\text{C}\{^1\text{H}\}$  DEPT Q NMR ( $\text{CDCl}_3$ , 101 MHz):  $\delta_{\text{C}}$  163.3 (C-Se), 147.4 (Ar C), 132.4 (Ar CH), 129.6 (Ar C), 125.6 (Ar CH), 55.8 (N(CH<sub>2</sub>)<sub>2</sub>N), 29.8 (CHMe<sub>2</sub>), 26.1 (CH<sub>3</sub>), 24.1 (CH<sub>3</sub>).  $^{77}\text{Se}$  NMR ( $\text{CDCl}_3$ , 76 MHz):  $\delta_{\text{Se}}$  627.9.

**[SeBr<sub>2</sub>(IMes)]**: m = 138.8 mg.  $^1\text{H}$  NMR ( $\text{CDCl}_3$ , 400 MHz):  $\delta_{\text{H}}$  7.43 (s, 2H, N(CH)<sub>2</sub>N), 7.07 (s, 4H, Ar CH), 2.39 (s, 6H, CH<sub>3</sub>), 2.33 (s, 12H, CH<sub>3</sub>).  $^{13}\text{C}\{^1\text{H}\}$  DEPT Q NMR ( $\text{CDCl}_3$ , 101 MHz):  $\delta_{\text{C}}$  141.3 (C-Se), 141.2 (Ar C), 135.5

---

<sup>1</sup> M. Saab, D. J. Nelson, N. V. Tzouras, T. A. C. A. Bayrakdar, S. P. Nolan, F. Nahra, K. Van Hecke, *Dalton Trans.* **2020**, 49,12068-12081

(Ar C), 132.3 (Ar C), 130.0 (Ar CH), 126.3 (N(CH)<sub>2</sub>N), 21.4 (CH<sub>3</sub>), 20.4 (CH<sub>3</sub>). <sup>77</sup>Se NMR (CDCl<sub>3</sub>, 76 MHz): δ<sub>Se</sub> 467.7.

**[SeBr<sub>2</sub>(SIMes)]**: m = 130.1 mg. <sup>1</sup>H NMR (CDCl<sub>3</sub>, 400 MHz): δ<sub>H</sub> 7.00 (s, 4H, Ar C–H), 4.28 (s, 4H, N(CH<sub>2</sub>)<sub>2</sub>N), 2.55 (s, 12H, CH<sub>3</sub>), 2.33 (s, 6H, CH<sub>3</sub>). <sup>13</sup>C{<sup>1</sup>H} DEPT Q NMR (CDCl<sub>3</sub>, 101 MHz): δ<sub>C</sub> 167.0 (C–Se), 140.3 (Ar C), 136.1 (Ar C), 132.3 (Ar C), 130.1 (Ar CH), 52.1 (N(CH<sub>2</sub>)<sub>2</sub>N), 21.3 (CH<sub>3</sub>), 20.5 (CH<sub>3</sub>). <sup>77</sup>Se NMR (CDCl<sub>3</sub>, 76 MHz): δ<sub>Se</sub> 501.9.

**[SeBr<sub>2</sub>(IPr<sup>Me</sup>)]**: m = 129.5 mg. <sup>1</sup>H NMR (CDCl<sub>3</sub>, 400 MHz): δ<sub>H</sub> 7.60 (t, J = 8 Hz, 2H, Ar CH), 7.42 (d, J = 7.8 Hz, 4H, Ar CH), 2.77 (sept, J = 6.6 Hz, 4H, CHMe<sub>2</sub>), 2.19 (s, 6H, CH<sub>3</sub>), 1.46 (d, J = 6.5 Hz, 12H, CH<sub>3</sub>), 1.15 (d, J = 6.7 Hz, 12H, CH<sub>3</sub>). <sup>13</sup>C{<sup>1</sup>H} DEPT Q NMR (CDCl<sub>3</sub>, 101 MHz): δ<sub>C</sub> 146.7 (Ar C), 143.9 (C–Se), 133.0 (Ar C), 132.1 (Ar CH), 130.4 (N(CH)<sub>2</sub>N), 125.7 (Ar CH), 29.4 (CHMe<sub>2</sub>), 25.6 (CH<sub>3</sub>), 25.4 (CH<sub>3</sub>), 12.1 (CH<sub>3</sub>). <sup>77</sup>Se NMR (CDCl<sub>3</sub>, 76 MHz): δ<sub>Se</sub> 482.3.

**[SeBr(IPr<sup>Cl</sup>)]Br<sub>3</sub>**: m = 128.4 mg. <sup>1</sup>H NMR (CDCl<sub>3</sub>, 400 MHz): δ<sub>H</sub> 7.67 (t, J = 7.8 Hz, 2H, Ar CH), 7.45 (d, J = 7.8 Hz, 4H, Ar CH), 2.75 (sept, J = 6.1 Hz, 4H, CHMe<sub>2</sub>), 1.49 (d, J = 6.4 Hz, 12H, CH<sub>3</sub>), 1.24 (d, J = 6.6 Hz, 12H, CH<sub>3</sub>). <sup>13</sup>C{<sup>1</sup>H} DEPT Q NMR (CDCl<sub>3</sub>, 101 MHz): δ<sub>C</sub> 146.9 (Ar C), 141.0 (C–Se), 133.1 (Ar CH), 129.5 (Ar C), 126.0 (Ar CH), 124.3 (N(CH)<sub>2</sub>N), 29.9 (CHMe<sub>2</sub>), 25.5 (CH<sub>3</sub>), 25.4 (CH<sub>3</sub>). <sup>77</sup>Se NMR (CDCl<sub>3</sub>, 76 MHz): δ<sub>Se</sub> 506.5.

**[SeBr<sub>2</sub>(ICy)]**: m = 146.7 mg. <sup>1</sup>H NMR (CDCl<sub>3</sub>, 400 MHz): δ<sub>H</sub> 7.27 (s, 2H, N(CH)<sub>2</sub>N), 5.02 (tt, 2H, J = 3.8 Hz, NCH), 2.43 (m, 4H, CH<sub>2</sub>), 1.98–1.95 (m, 4H, CH<sub>2</sub>), 1.85–1.82 (m, 2H, CH<sub>2</sub>), 1.63–1.54 (m, 8H, CH<sub>2</sub>), 1.27–1.25 (m, 2H, CH<sub>2</sub>). <sup>13</sup>C{<sup>1</sup>H} DEPT Q NMR (CDCl<sub>3</sub>, 101 Hz): δ<sub>C</sub> 141.6 (C–Se), 120.0 (N(CH)<sub>2</sub>N), 61.4 (NCH), 33.4 (CH<sub>2</sub>), 25.5 (CH<sub>2</sub>), 25.2 (CH<sub>2</sub>). **CHN calculated for C<sub>15</sub>H<sub>24</sub>Br<sub>2</sub>N<sub>2</sub>Se**: C, 38.24; H, 5.13; N, 5.95. Found: C, 37.84; H, 5.03; N, 5.82. <sup>77</sup>Se NMR (CDCl<sub>3</sub>, 76 MHz): δ<sub>Se</sub> 298.6.

**[Br<sub>2</sub>{Se(IPr\*)}]**: m = 107.9 mg. <sup>1</sup>H NMR (CDCl<sub>3</sub>, 400 MHz): δ<sub>H</sub> 7.28 (d, J = 4.8 Hz, 8H, Ar CH), 7.11–7.06 (m, 24H, Ar CH), 6.84–6.69 (m, 12H, Ar CH), 5.76 (s, 4H, CH(Ph)<sub>2</sub>), 4.96 (s, 2H, N(CH<sub>2</sub>)<sub>2</sub>N), 2.25 (s, 6H, CH<sub>3</sub>). <sup>13</sup>C{<sup>1</sup>H} DEPT Q NMR (CDCl<sub>3</sub>, 101 MHz): δ<sub>C</sub> 144.2 (Ar C), 142.8 (Ar C), 141.6 (Ar C), 141.2 (C–Se), 140.6 (Ar C), 131.8 (Ar C), 131.2 (Ar CH), 130.8 (Ar CH), 129.4 (Ar CH), 128.5 (Ar CH), 128.3 (Ar CH), 126.7 (Ar CH), 126.6 (Ar CH), 124.7 (CH<sub>imid</sub>), 51.0 (CHPh<sub>2</sub>), 22.0 (CH<sub>3</sub>). <sup>77</sup>Se NMR (CDCl<sub>3</sub>, 76 MHz): δ<sub>Se</sub> 462.2.

### Dibromo-thioureas

**[(Br<sub>2</sub>)-S(IPr)]**: m = 135.2 mg. <sup>1</sup>H NMR (CDCl<sub>3</sub>, 400 MHz): δ<sub>H</sub> 7.89 (s, 2H, N(CH)<sub>2</sub>N), 7.64 (t, J = 7.8 Hz, 2H, Ar CH), 7.42 (d, J = 8 Hz, 4H, Ar CH), 2.37 (sept, J = 6.5 Hz, 4H, CHMe<sub>2</sub>), 1.38 (d, J = 6.8 Hz, 12H, CH<sub>3</sub>), 1.26 (d, J = 6.8 Hz, 12H, CH<sub>3</sub>). <sup>13</sup>C{<sup>1</sup>H} DEPT Q NMR (CDCl<sub>3</sub>, 101 MHz): δ<sub>C</sub> 202.0 (C–S), 145.4 (Ar C), 132.7 (Ar C), 130.2 (Ar CH) (determined with HMBC), 129.7 (N(CH)<sub>2</sub>N) (determined with HMBC), 125.3 (Ar CH), 29.8 (CHMe<sub>2</sub>), 26.0 (CH<sub>3</sub>), 23.6 (CH<sub>3</sub>).

**[(Br<sub>2</sub>)-S(SIPr)]**: m = 132.8 mg. <sup>1</sup>H NMR (CDCl<sub>3</sub>, 400 MHz): δ<sub>H</sub> 7.47 (t, J = 7.8 Hz, 2H, Ar CH), 7.28 (d, J = 7.8 Hz, 4H, Ar CH), 4.23 (s, 4H, N(CH<sub>2</sub>)<sub>2</sub>N), 2.98 (sept., J = 6.8 Hz, 4H, CHMe<sub>2</sub>), 1.39 (d, J = 6.8 Hz, 12H, CH<sub>3</sub>), 1.35 (d, J = 6.9 Hz, 12H, CH<sub>3</sub>). <sup>13</sup>C{<sup>1</sup>H} DEPT Q NMR (CDCl<sub>3</sub>, 101 MHz): δ<sub>C</sub> 177.8 (C–S) (determined with HMBC), 147.1 (Ar C), 131.9 (Ar C), 131.1 (Ar CH), 125.2 (Ar CH), 52.8 (N(CH<sub>2</sub>)<sub>2</sub>N), 29.5 (CHMe<sub>2</sub>), 25.3 (CH<sub>3</sub>), 24.2 (CH<sub>3</sub>).

**[(Br<sub>2</sub>)-S(IMes)]**: m = 140.1 mg. <sup>1</sup>H NMR (CDCl<sub>3</sub>, 400 MHz): δ<sub>H</sub> 7.08 (s, 2H, N(CH)<sub>2</sub>N), 7.05 (s, 4H, Ar CH), 2.36 (s, 6H, CH<sub>3</sub>), 2.15 (s, 12H, CH<sub>3</sub>). <sup>13</sup>C{<sup>1</sup>H} DEPT Q NMR (CDCl<sub>3</sub>, 101 MHz): δ<sub>C</sub> 141.0 (C–S), 137.9 (Ar C), 135.8 (Ar C), 134.8 (Ar C), 130.1 (N(CH)<sub>2</sub>N), 129.9 (Ar CH), 21.4 (CH<sub>3</sub>), 20.4 (CH<sub>3</sub>).

**[(Br<sub>2</sub>)-S(SIMes)]**: m = 139.8 mg. <sup>1</sup>H NMR (CDCl<sub>3</sub>, 400 MHz): δ<sub>H</sub> 7.00 (s, 4H, Ar C-H), 4.20 (s, 4H, N(CH<sub>2</sub>)<sub>2</sub>N), 2.33 (s, 12H, CH<sub>3</sub>), 2.32 (s, 6H, CH<sub>3</sub>). <sup>13</sup>C{<sup>1</sup>H} DEPT Q NMR (CDCl<sub>3</sub>, 101 MHz): δ<sub>C</sub> 173.9 (C-S), 140.3 (Ar C), 135.9 (Ar C), 132.2 (Ar C), 130.2 (Ar CH), 50.3 (N(CH<sub>2</sub>)<sub>2</sub>N), 21.3 (CH<sub>3</sub>), 18.1 (CH<sub>3</sub>).

**[SBr-(IPr<sup>Me</sup>)]Br<sub>3</sub>**: m = 130.1 mg. <sup>1</sup>H NMR (CDCl<sub>3</sub>, 500 MHz): δ<sub>H</sub> 7.58 (t, J = 7.8 Hz, 2H, Ar CH), 7.41 (d, J = 7.8 Hz, 4H, Ar CH), 2.88 (sept, J = 8 Hz, 4H, CHMe<sub>2</sub>), 2.15 (s, 6H, CH<sub>3</sub>), 1.45 (d, J = 6.5 Hz, 12H, CH<sub>3</sub>), 1.11 (d, J = 6.8 Hz, 12H, CH<sub>3</sub>). <sup>13</sup>C{<sup>1</sup>H} DEPT Q NMR (CDCl<sub>3</sub>, 125 MHz): δ<sub>C</sub> (C-S signal was not located), 147.2 (Ar C), 131.8 (Ar CH), 131.3 (N(CH)<sub>2</sub>N) (HMBC), 130.4 (Ar C) (HMBC), 125.4 (Ar CH), 29.1 (CHMe<sub>2</sub>), 25.5 (CH<sub>3</sub>), 25.3 (CH<sub>3</sub>), 11.8 (CH<sub>3</sub>). The carbon attached to sulfur could not be located.

**[(Br<sub>2</sub>)-S(IPr<sup>Cl</sup>)]**: m = 126.0 mg. <sup>1</sup>H NMR (CDCl<sub>3</sub>, 400 MHz): δ<sub>H</sub> 7.53 (t, J = 7.8 Hz, 2H, Ar CH), 7.33 (d, J = 7.8 Hz, 4H, Ar CH), 2.65 (sept, J = 6.8 Hz, 4H, CHMe<sub>2</sub>), 1.31 (d, J = 6.8 Hz, 12H, CH<sub>3</sub>), 1.26 (d, J = 6.9 Hz, 12H, CH<sub>3</sub>). <sup>13</sup>C{<sup>1</sup>H} DEPT Q NMR (CDCl<sub>3</sub>, 101 MHz): δ<sub>C</sub> 165.4 (C-S), 147.2 (Ar C), 131.1 (Ar CH), 130.4 (Ar C), 124.6 (Ar CH), 114.0 (N(CH)<sub>2</sub>N), 29.6 (CHMe<sub>2</sub>), 24.0 (CH<sub>3</sub>), 24.0 (CH<sub>3</sub>).

**[SBr-(ICy)]Br**: m = 152.4 mg. <sup>1</sup>H NMR (CDCl<sub>3</sub>, 400 MHz): δ<sub>H</sub> 7.28 (s, 2H, N(CH)<sub>2</sub>N), 4.96 (tt, 2H, J = 7.8 Hz, NCH), 2.44–2.42 (m, 4H, CH<sub>2</sub>), 1.97–1.90 (m, 4H, CH<sub>2</sub>), 1.84–1.80 (m, 2H, CH<sub>2</sub>), 1.63–1.46 (m, 8H, CH<sub>2</sub>), 1.29–1.22 (m, 2H, CH<sub>2</sub>). <sup>13</sup>C{<sup>1</sup>H} DEPT Q NMR (CDCl<sub>3</sub>, 101 MHz): δ<sub>C</sub> (C-S signal was not located), 119.4 (N(CH)<sub>2</sub>N), 59.6 (NCH), 32.9 (CH<sub>2</sub>), 25.4 (CH<sub>2</sub>), 25.2 (CH<sub>2</sub>).

### General procedure for the synthesis of NHC-based dichloro-chalcogenoureas

100 mg of seleno- or thiourea NHCs were dissolved in 3 mL of dichloromethane. 1.2 equiv. of SO<sub>2</sub>Cl<sub>2</sub> was added to the solution and the mixture was stirred for 4 h at room temperature. The product was then washed with pentane and dried in the vacuum oven.

### Dichloro-selenoureas

**[SeCl<sub>2</sub>(IPr)]**: m = 112.8 mg. <sup>1</sup>H NMR (CDCl<sub>3</sub>, 400 MHz): δ<sub>H</sub> 7.58 (t, J = 7.8 Hz, 2H, Ar CH), 7.41 (s, 2H, N(CH)<sub>2</sub>N), 7.40 (d, J = 7.8 Hz, 4H, Ar CH), 2.89 (sept, J = 8 Hz, 4H, CHMe<sub>2</sub>), 1.44 (d, J = 6.6 Hz, 12H, CH<sub>3</sub>), 1.13 (d, J = 6.9 Hz, 12H, CH<sub>3</sub>). <sup>13</sup>C{<sup>1</sup>H} DEPT Q NMR (CDCl<sub>3</sub>, 101 MHz): δ<sub>C</sub> 150.6 (C-Se), 146.3 (Ar C), 132.4 (Ar C), 131.9 (Ar CH), 125.4 (N(CH)<sub>2</sub>N), 124.8 (Ar CH), 29.3 (CHMe<sub>2</sub>), 26.5 (CH<sub>3</sub>), 23.1 (CH<sub>3</sub>). **CHN calculated for C<sub>27</sub>H<sub>36</sub>Cl<sub>2</sub>N<sub>2</sub>Se**: C, 60.23; H, 6.74; N, 5.20. Found: C, 59.77; H, 6.67; N, 5.13. <sup>77</sup>Se NMR (CDCl<sub>3</sub>, 76 MHz): δ<sub>Se</sub> 526.7.

**[SeCl<sub>2</sub>(SIPr)]**: m = 110.4 mg. <sup>1</sup>H NMR (CDCl<sub>3</sub>, 400 MHz): δ<sub>H</sub> 7.47 (t, J = 4 Hz, 2H, Ar CH), 7.32 (d, J = 7.8 Hz, 4H, Ar CH), 4.36 (s, 4H, N(CH)<sub>2</sub>N), 3.29 (sept., J = 8 Hz, 4H, CHMe<sub>2</sub>), 1.50 (d, J = 6.5 Hz, 12H, CH<sub>3</sub>), 1.27 (d, J = 6.8 Hz, 12H, CH<sub>3</sub>). <sup>13</sup>C{<sup>1</sup>H} DEPT Q NMR (CDCl<sub>3</sub>, 101 MHz): δ<sub>C</sub> 171.8 (C-Se) (determined by HMBC), 146.9 (Ar C), 132.9 (Ar C), 130.9 (Ar CH), 125.0 (Ar CH), 53.7 (N(CH)<sub>2</sub>N), 29.5 (CHMe<sub>2</sub>), 27.0 (CH<sub>3</sub>), 23.8 (CH<sub>3</sub>). <sup>77</sup>Se NMR (CDCl<sub>3</sub>, 76 MHz): δ<sub>Se</sub> 197.3.

**[SeCl<sub>2</sub>(IMes)]**: m = 109.1 mg. <sup>1</sup>H NMR (CDCl<sub>3</sub>, 400 MHz): δ<sub>H</sub> 7.38 (s, 2H, N(CH)<sub>2</sub>N), 7.06 (s, 4H, Ar CH), 2.38 (s, 6H, CH<sub>3</sub>), 2.31 (s, 12H, CH<sub>3</sub>). <sup>13</sup>C{<sup>1</sup>H} DEPT Q NMR (CDCl<sub>3</sub>, 101 MHz): δ<sub>C</sub> 141.2 (Ar C), 135.7 (C-Se), 132.3 (Ar C), 130.8 (Ar C), 129.9 (Ar CH), 125.0 (N(CH)<sub>2</sub>N), 21.4 (CH<sub>3</sub>), 19.4 (CH<sub>3</sub>). <sup>77</sup>Se NMR (CDCl<sub>3</sub>, 76 MHz): δ<sub>Se</sub> 551.5 (a second unidentified Se signal was observed at 558.9 ppm).

**[SeCl<sub>2</sub>(SIMes)]**: m = 112.4 mg. <sup>1</sup>H NMR (CDCl<sub>3</sub>, 400 MHz): δ<sub>H</sub> 7.00 (s, 4H, Ar CH), 4.31 (s, 4H, N(CH)<sub>2</sub>N), 2.53 (s, 6H, CH<sub>3</sub>), 2.33 (s, 12H, CH<sub>3</sub>). <sup>13</sup>C{<sup>1</sup>H} DEPT Q NMR (CDCl<sub>3</sub>, 101 MHz): δ<sub>C</sub> 169.9 (C-Se), 140.2 (Ar C),

136.3 (Ar C), 132.4 (Ar C), 130.0 (Ar CH), 51.4 (N(CH<sub>2</sub>)<sub>2</sub>N), 21.3 (CH<sub>3</sub>), 19.6 (CH<sub>3</sub>). **CHN calculated for C<sub>21</sub>H<sub>26</sub>Cl<sub>2</sub>N<sub>2</sub>Se**: C, 55.28; H, 5.74; N, 6.14. Found: C, 54.74; H, 5.70; N, 6.04. **<sup>77</sup>Se NMR** (CDCl<sub>3</sub>, 76 MHz): δ<sub>Se</sub> 586.9.

**[SeCl<sub>2</sub>(IPr<sup>Me</sup>)]:** m = 108.5 mg. **<sup>1</sup>H NMR** (CDCl<sub>3</sub>, 400 MHz): δ<sub>H</sub> 7.58 (t, J = 8 Hz, 2H, Ar CH), 7.41 (d, J = 7.8 Hz, 4H, Ar CH), 2.87 (sept, J = 8 Hz, 4H, CHMe<sub>2</sub>), 2.16 (s, 6H, CH<sub>3</sub>), 1.45 (d, J = 6.5 Hz, 12H, CH<sub>3</sub>), 1.11 (d, J = 6.8 Hz, 12H, CH<sub>3</sub>). **<sup>13</sup>C{<sup>1</sup>H} DEPT Q NMR** (CDCl<sub>3</sub>, 101 MHz): δ<sub>C</sub> 147.0 (Ar C), 145.5 (C-Se), 132.2 (Ar CH), 130.5 (Ar C), 125.5 (Ar CH), 125.2 (N(CH)<sub>2</sub>N), 29.2 (CHMe<sub>2</sub>), 25.4 (CH<sub>3</sub>), 25.3 (CH<sub>3</sub>), 11.8 (CH<sub>3</sub>). **<sup>77</sup>Se NMR** (CDCl<sub>3</sub>, 76 MHz): δ<sub>Se</sub> 554.3.

**[SeCl<sub>2</sub>(IPr<sup>Cl</sup>)]:** m = 110.9 mg. **<sup>1</sup>H NMR** (CDCl<sub>3</sub>, 400 MHz): δ<sub>H</sub> 7.63 (t, J = 7.8 Hz, 2H, Ar CH), 7.43 (d, J = 7.8 Hz, 4H, Ar CH), 2.86 (sept, J = 6.6 Hz, 4H, CHMe<sub>2</sub>), 1.47 (d, J = 6.5 Hz, 12H, CH<sub>3</sub>), 1.20 (d, J = 6.8 Hz, 12H, CH<sub>3</sub>). **<sup>13</sup>C{<sup>1</sup>H} DEPT Q NMR** (CDCl<sub>3</sub>, 101 MHz): 180.6 (C-Se), 147.2 (Ar C), 131.7 (Ar CH), 130.0 (Ar C) (HMBC), 128.4 (N(CH)<sub>2</sub>N), 125.4 (Ar CH), 29.7 (CHMe<sub>2</sub>), 25.6 (CH<sub>3</sub>), 25.1 (CH<sub>3</sub>). **CHN calculated for C<sub>27</sub>H<sub>34</sub>Cl<sub>4</sub>N<sub>2</sub>Se**: C, 53.40; H, 5.64; N, 4.61. Found: C, 52.74; H, 5.59; N, 4.48. **<sup>77</sup>Se NMR** (CDCl<sub>3</sub>, 76 MHz): δ<sub>Se</sub> 546.9.

**[SeCl<sub>2</sub>(ICy)]:** m = 120.3 mg. **<sup>1</sup>H NMR** (CDCl<sub>3</sub>, 400 MHz): δ<sub>H</sub> 7.27 (s, 2H, N(CH)<sub>2</sub>N), 5.05 (tt, 2H, J = 4 Hz, NCH), 2.39 (m, 4H, CH<sub>2</sub>), 1.97–1.92 (m, 4H, CH<sub>2</sub>), 1.84–1.77 (m, 2H, CH<sub>2</sub>), 1.66–1.52 (m, 8H, CH<sub>2</sub>), 1.29–1.19 (m, 2H, CH<sub>2</sub>). **<sup>13</sup>C{<sup>1</sup>H} DEPT Q NMR** (CDCl<sub>3</sub>, 101 Hz): δ<sub>C</sub> 144.9 (C-Se), 119.1 (N(CH)<sub>2</sub>N), 61.1 (NCH), 33.5 (CH<sub>2</sub>), 25.4 (CH<sub>2</sub>), 25.2 (CH<sub>2</sub>). **CHN calculated for C<sub>15</sub>H<sub>24</sub>Cl<sub>2</sub>N<sub>2</sub>Se**: C, 47.14; H, 6.33; N, 7.33. Found: C, 46.75; H, 6.24; N, 7.10. **<sup>77</sup>Se NMR** (CDCl<sub>3</sub>, 76 MHz): δ<sub>Se</sub> 441.6.

**[SeCl<sub>2</sub>(IPr<sup>\*</sup>)]:** m = 101.7 mg. **<sup>1</sup>H NMR** (CDCl<sub>3</sub>, 400 MHz): 7.27 (d, J = 4.3 Hz, 8H, Ar CH), 7.24–7.01 (m, 24H, Ar CH), 6.78–6.65 (m, 12H, Ar CH), 5.89 (s, 4H, CH(Ph)<sub>2</sub>), 4.85 (s, 2H, N(CH)<sub>2</sub>N), 2.22 (s, 6H, CH<sub>3</sub>). **<sup>13</sup>C{<sup>1</sup>H} DEPT Q NMR** (CDCl<sub>3</sub>, 101 MHz): δ<sub>C</sub> 166.0 (C-Se), 145.4 (Ar C), 144.0 (Ar C), 143.2 (Ar C), 141.9 (Ar C), 140.5 (Ar C), 131.2 (Ar C), 130.6 (Ar CH), 129.4 (Ar CH), 128.5 (Ar CH), 128.3 (Ar CH), 126.7 (Ar CH), 126.6 (Ar CH), 124.2 (CH<sub>imid</sub>), 50.7 (CHPh<sub>2</sub>), 22.0 (CH<sub>3</sub>). **<sup>77</sup>Se NMR** (CDCl<sub>3</sub>, 76 MHz): δ<sub>Se</sub> 519.8.

### General procedure for the synthesis of NHC-based diiodo-chalcogenoureas

100 mg of seleno- or thio-urea NHCs was dissolved in 3 mL of acetone. 1.2 equiv. of iodine was added to the solution and the mixture was stirred for 5 h at room temperature. The product was then washed with pentane and dried.

#### Diiodo-selenoureas

**[(I<sub>2</sub>)·Se(IPr)]:** m = 146.5 mg. **<sup>1</sup>H NMR** (CDCl<sub>3</sub>, 400 MHz): δ<sub>H</sub> 7.58 (t, J = 7.8 Hz, 2H, Ar CH), 7.36 (d, J = 7.8 Hz, 4H, Ar CH), 7.27 (s, 2H, N(CH)<sub>2</sub>N), 2.50 (sept, J = 6.8 Hz, 4H, CHMe<sub>2</sub>), 1.41 (d, J = 6.8 Hz, 12H, CH<sub>3</sub>), 1.19 (d, J = 6.9 Hz, 12H, CH<sub>3</sub>). **<sup>13</sup>C{<sup>1</sup>H} DEPT Q NMR** (CDCl<sub>3</sub>, 101 MHz): δ<sub>C</sub> 150.5 (C-Se) (determined by HMBC), 145.7 (Ar C), 132.5 (Ar C), 131.8 (Ar CH), 125.0 (Ar CH), 124.4 (N(CH)<sub>2</sub>N), 29.5 (CHMe<sub>2</sub>), 25.4 (CH<sub>3</sub>), 23.6 (CH<sub>3</sub>). **<sup>77</sup>Se NMR** (CDCl<sub>3</sub>, 76 MHz): δ<sub>Se</sub> 264.5. **CHN calculated for C<sub>27</sub>H<sub>36</sub>I<sub>2</sub>N<sub>2</sub>Se**: C, 44.96; H, 5.03; N, 3.88. Found: C, 45.18; H, 5.01; N, 4.01.

**[(Se(SIPr))<sub>2</sub>(μ-I)]<sub>5</sub>:** m = 146.3 mg. **<sup>1</sup>H NMR** (CDCl<sub>3</sub>, 400 MHz): δ<sub>H</sub> 7.50 (t, J = 7.8 Hz, 2H, Ar CH), 7.29 (d, J = 7.8 Hz, 4H, Ar CH), 4.14 (s, 4H, N(CH)<sub>2</sub>N), 2.94 (sept., J = 6.6 Hz, 4H, CHMe<sub>2</sub>), 1.42 (d, J = 6.7 Hz, 12H, CH<sub>3</sub>), 1.31 (d, J = 6.7 Hz, 12H, CH<sub>3</sub>). **<sup>13</sup>C{<sup>1</sup>H} DEPT Q NMR** (CDCl<sub>3</sub>, 101 MHz): δ<sub>C</sub> 175.0 (C-Se), 146.9 (Ar C), 132.9 (Ar C), 131.2 (Ar CH), 125.3 (Ar CH), 53.0 (N(CH)<sub>2</sub>N), 29.5 (CHMe<sub>2</sub>), 25.4 (CH<sub>3</sub>), 24.3 (CH<sub>3</sub>). **<sup>77</sup>Se NMR** (CDCl<sub>3</sub>,

76 MHz):  $\delta_{\text{Se}}$  339.9. **CHN calculated for  $\text{C}_{27}\text{H}_{38}\text{I}_2\text{N}_2\text{Se}$** : C, 44.83; H, 5.30; N, 3.87. Found: C, 44.87; H, 5.27; N, 3.98.

**[(I<sub>2</sub>)-Se(IMes)]**: m = 154.5 mg. **<sup>1</sup>H NMR** (CDCl<sub>3</sub>, 400 MHz):  $\delta_{\text{H}}$  7.33 (s, 2H, N(CH)<sub>2</sub>N), 7.10 (s, 4H, Ar CH), 2.41 (s, 6H, CH<sub>3</sub>), 2.15 (s, 12H, CH<sub>3</sub>). **<sup>13</sup>C{<sup>1</sup>H} DEPT Q NMR** (CDCl<sub>3</sub>, 101 MHz):  $\delta_{\text{C}}$  160.2 (C-Se), 141.4 (Ar C), 134.8 (Ar C), 132.5 (Ar C), 130.1 (Ar CH), 124.4 (N(CH)<sub>2</sub>N), 21.5 (CH<sub>3</sub>), 18.6 (CH<sub>3</sub>). **<sup>77</sup>Se NMR** (CDCl<sub>3</sub>, 76 MHz):  $\delta_{\text{Se}}$  262.7.

**[(I<sub>2</sub>)-Se(SIMes)]**: yield = 91%, m = 150.9 mg. **<sup>1</sup>H NMR** (CDCl<sub>3</sub>, 400 MHz):  $\delta_{\text{H}}$  7.02 (s, 4H, Ar C-H), 4.13 (s, 4H, N(CH<sub>2</sub>)<sub>2</sub>N), 2.36 (s, 12H, CH<sub>3</sub>), 2.32 (s, 6H, CH<sub>3</sub>). **<sup>13</sup>C{<sup>1</sup>H} DEPT Q NMR** (CDCl<sub>3</sub>, 101 MHz):  $\delta_{\text{C}}$  170.0 (C-Se), 140.7 (Ar C), 136.1 (Ar C), 132.7 (Ar C), 130.3 (Ar CH), 50.8 (N(CH<sub>2</sub>)<sub>2</sub>N), 21.4 (CH<sub>3</sub>), 18.3 (CH<sub>3</sub>). **<sup>77</sup>Se NMR** (CDCl<sub>3</sub>, 76 MHz):  $\delta_{\text{Se}}$  315.6.

**[SeI(IPr<sup>Me</sup>)]I<sub>3</sub>**: m = 139.1 mg. **<sup>1</sup>H NMR** (CDCl<sub>3</sub>, 400 MHz):  $\delta_{\text{H}}$  7.64 (t, J = 7.8 Hz, 2H, Ar CH), 7.39 (d, J = 7.8 Hz, 4H, Ar CH), 2.39 (sept, J = 4 Hz, 4H, CHMe<sub>2</sub>), 2.06 (s, 6H, CH<sub>3</sub>), 1.38 (d, J = 6.4 Hz, 12H, CH<sub>3</sub>), 1.23 (d, J = 6.1 Hz, 12H, CH<sub>3</sub>). **<sup>13</sup>C{<sup>1</sup>H} DEPT Q NMR** (CDCl<sub>3</sub>, 101 MHz):  $\delta_{\text{C}}$  (C-S signal was not located), 146.1 (Ar C), 132.2 (Ar CH), 130.2 (Ar C), 128.4 (N(CH)<sub>2</sub>N), 125.4 (Ar CH), 29.4 (CHMe<sub>2</sub>), 24.4 (CH<sub>3</sub>), 24.3 (CH<sub>3</sub>), 10.3 (CH<sub>3</sub>). **<sup>77</sup>Se NMR** (CDCl<sub>3</sub>, 76 MHz):  $\delta_{\text{Se}}$  327.7.

**[(I<sub>2</sub>)-Se(IPr<sup>Cl</sup>)]**: m = 138.4 mg. **<sup>1</sup>H NMR** (CDCl<sub>3</sub>, 400 MHz):  $\delta_{\text{H}}$  7.66 (t, J = 7.8 Hz, 2H, Ar CH), 7.40 (d, J = 7.8 Hz, 4H, Ar CH), 2.43 (sept, J = 6.8 Hz, 4H, CHMe<sub>2</sub>), 1.38 (d, J = 6.8 Hz, 12H, CH<sub>3</sub>), 1.26 (d, J = 6.9 Hz, 12H, CH<sub>3</sub>). **<sup>13</sup>C{<sup>1</sup>H} DEPT Q NMR** (CDCl<sub>3</sub>, 101 MHz): 148.0 (C-Se), 146.5 (Ar C), 132.8 (Ar C), 129.4 (Ar CH), 125.4 (Ar CH), 119.4 (N(CH)<sub>2</sub>N), 29.8 (CHMe<sub>2</sub>), 24.3 (CH<sub>3</sub>), 23.9 (CH<sub>3</sub>). **<sup>77</sup>Se NMR** (CDCl<sub>3</sub>, 76 MHz):  $\delta_{\text{Se}}$  341.7.

**[SeI<sub>2</sub>(ICy)]**: m = 168.8 mg. **<sup>1</sup>H NMR** (CDCl<sub>3</sub>, 400 MHz):  $\delta_{\text{H}}$  7.33 (s, 2H, N(CH)<sub>2</sub>N), 4.85 (tt, 2H, J = 3.7 Hz, NCH), 2.44–2.41 (m, 4H, CH<sub>2</sub>), 2.00–1.96 (m, 4H, CH<sub>2</sub>), 1.86–1.83 (m, 2H, CH<sub>2</sub>), 1.65–1.47 (m, 8H, CH<sub>2</sub>), 1.30–1.23 (m, 2H, CH<sub>2</sub>). **<sup>13</sup>C{<sup>1</sup>H} DEPT Q NMR** (CDCl<sub>3</sub>, 101 Hz):  $\delta_{\text{C}}$  137.5 (C-Se), 120.4 (N(CH)<sub>2</sub>N), 61.6 (NCH), 32.8 (CH<sub>2</sub>), 25.4 (CH<sub>2</sub>), 25.2 (CH<sub>2</sub>). **<sup>77</sup>Se NMR** (CDCl<sub>3</sub>, 76 MHz):  $\delta_{\text{Se}}$  98.4.

**[(I<sub>2</sub>)-Se(IPr\*)]**: m = 118.0 mg. **<sup>1</sup>H NMR** (CDCl<sub>3</sub>, 400 MHz):  $\delta_{\text{H}}$  7.29 (d, J = 8 Hz, 8H, Ar CH), 7.25–7.08 (m, 24H, Ar CH), 6.89–6.76 (m, 12H, Ar CH), 5.33 (s, 4H, CH(Ph)<sub>2</sub>), 5.21 (s, 2H, N(CH<sub>2</sub>)<sub>2</sub>N), 2.29 (s, 6H, CH<sub>3</sub>). **<sup>13</sup>C{<sup>1</sup>H} DEPT Q NMR** (CDCl<sub>3</sub>, 101 MHz):  $\delta_{\text{C}}$  147.7 (C-Se), 143.0 (Ar C), 142.1 (Ar C), 141.5 (Ar C), 141.3 (Ar C), 132.0 (Ar C), 130.9 (Ar C), 130.3 (Ar CH), 129.3 (Ar CH), 128.7 (Ar CH), 128.5 (Ar CH), 126.1 (Ar CH), 126.9 (CH<sub>imid</sub>), 123.5 (Ar CH) (determined by HMBC), 52.1 (CHPh<sub>2</sub>), 22.2 (CH<sub>3</sub>). **<sup>77</sup>Se NMR** (CDCl<sub>3</sub>, 76 MHz):  $\delta_{\text{Se}}$  280.8.

## Diiodo-thioureas

**[(I<sub>2</sub>)-S(IPr)]**: m = 152.3 mg. **<sup>1</sup>H NMR** (CDCl<sub>3</sub>, 400 MHz):  $\delta_{\text{H}}$  7.54 (t, J = 7.8 Hz, 2H, Ar CH), 7.35 (d, J = 7.8 Hz, 4H, Ar CH), 7.11 (s, 2H, N(CH)<sub>2</sub>N), 2.58 (sept, J = 6.8 Hz, 4H, CHMe<sub>2</sub>), 1.39 (d, J = 6.8 Hz, 12H, CH<sub>3</sub>), 1.20 (d, J = 6.9 Hz, 12H, CH<sub>3</sub>). **<sup>13</sup>C{<sup>1</sup>H} DEPT Q NMR** (CDCl<sub>3</sub>, 101 MHz):  $\delta_{\text{C}}$  157.1 (C-S) (determined by HMBC), 146.0 (Ar C), 132.4 (Ar C), 131.3 (Ar CH), 124.8 (Ar CH), 122.2 (N(CH)<sub>2</sub>N), 29.4 (CHMe<sub>2</sub>), 25.3 (CH<sub>3</sub>), 23.6 (CH<sub>3</sub>). **CHN calculated for  $\text{C}_{27}\text{H}_{36}\text{I}_2\text{N}_2\text{S}$** : C, 48.08; H, 5.38; N, 4.15. Found: C, 47.62; H, 5.25; N, 3.95.

**[(I<sub>2</sub>)-S(SIPr)]**: m = 151.9 mg. **<sup>1</sup>H NMR** (CDCl<sub>3</sub>, 400 MHz):  $\delta_{\text{H}}$  7.46 (t, J = 7.8 Hz, 2H, Ar CH), 7.29 (d, J = 7.8 Hz, 4H, Ar CH), 4.25 (s, 4H, N(CH<sub>2</sub>)<sub>2</sub>N), 3.01 (sept., J = 8 Hz, 4H, CHMe<sub>2</sub>), 1.37 (d, J = 2.2 Hz, 12H, CH<sub>3</sub>), 1.35 (d, J = 2.1 Hz, 12H, CH<sub>3</sub>). **<sup>13</sup>C{<sup>1</sup>H} DEPT Q NMR** (CDCl<sub>3</sub>, 101 MHz):  $\delta_{\text{C}}$  167.1 (C-S), 147.4 (Ar C), 130.8 (Ar CH), 126.0 (Ar C), 125.2 (Ar CH), 52.1 (N(CH<sub>2</sub>)<sub>2</sub>N), 29.4 (CHMe<sub>2</sub>), 25.0 (CH<sub>3</sub>), 24.5 (CH<sub>3</sub>).

**[(I<sub>2</sub>)-S(IMes)]:** m = 157.8 mg. <sup>1</sup>H NMR (CDCl<sub>3</sub>, 400 MHz): δ<sub>H</sub> 7.10 (s, 2H, N(CH)<sub>2</sub>N), 7.06 (s, 4H, Ar CH), 2.38 (s, 6H, CH<sub>3</sub>), 2.16 (s, 12H, CH<sub>3</sub>). <sup>13</sup>C{<sup>1</sup>H} DEPT Q NMR (CDCl<sub>3</sub>, 101 MHz): δ<sub>C</sub> 153.5 (C-S), 140.7 (Ar C), 135.1 (Ar C), 132.4 (Ar C), 129.9 (Ar CH), 121.8 (N(CH)<sub>2</sub>N), 21.4 (CH<sub>3</sub>), 18.5 (CH<sub>3</sub>). **CHN calculated for C<sub>21</sub>H<sub>24</sub>I<sub>2</sub>N<sub>2</sub>S:** C, 42.73; H, 4.10; N, 4.75. Found: C, 42.58; H, 4.05; N, 4.76.

**[(I<sub>2</sub>)-S(SIMes)]:** m = 164.4 mg. <sup>1</sup>H NMR (CDCl<sub>3</sub>, 400 MHz): δ<sub>H</sub> 7.00 (s, 4H, Ar C-H), 4.05 (s, 4H, N(CH<sub>2</sub>)<sub>2</sub>N), 2.33 (s, 6H, CH<sub>3</sub>), 2.32 (s, 12H, CH<sub>3</sub>). <sup>13</sup>C{<sup>1</sup>H} DEPT Q NMR (CDCl<sub>3</sub>, 101 MHz): δ<sub>C</sub> 176.6 (C-S), 139.6 (Ar C), 136.4 (Ar C), 133.4 (Ar C), 130.0 (Ar CH), 49.0 (N(CH<sub>2</sub>)<sub>2</sub>N), 21.3 (CH<sub>3</sub>), 18.1 (CH<sub>3</sub>).

**[(I<sub>2</sub>)-S(IPr<sup>Me</sup>)]:** m = 142.5 mg. <sup>1</sup>H NMR (CDCl<sub>3</sub>, 400 MHz): δ<sub>H</sub> 7.55 (t, J = 7.8 Hz, 2H, Ar CH), 7.35 (d, J = 7.8 Hz, 4H, Ar CH), 2.49 (sept, J = 6.7 Hz, 4H, CHMe<sub>2</sub>), 1.97 (s, 6H, CH<sub>3</sub>), 1.35 (d, J = 6.8 Hz, 12H, CH<sub>3</sub>), 1.21 (d, J = 6.9 Hz, 12H, CH<sub>3</sub>). <sup>13</sup>C{<sup>1</sup>H} DEPT Q NMR (CDCl<sub>3</sub>, 101 MHz): δ<sub>C</sub> 176.6 (C-S), 146.4 (Ar C), 131.4 (Ar CH), 130.5 (Ar C), 125.4 (N(CH)<sub>2</sub>N), 125.0 (Ar CH), 29.3 (CHMe<sub>2</sub>), 24.3 (CH<sub>3</sub>), 24.2 (CH<sub>3</sub>), 10.1 (CH<sub>3</sub>).

**[(I<sub>2</sub>)-S(IPr<sup>Cl</sup>)]:** m = 139.6 mg. <sup>1</sup>H NMR (CDCl<sub>3</sub>, 400 MHz): δ<sub>H</sub> 7.55(t, J = 8 Hz, 2H, Ar CH), 7.34 (d, J = 7.8 Hz, 4H, Ar CH), 2.59 (sept, J = 6.9 Hz, 4H, CHMe<sub>2</sub>), 1.32 (d, J = 6.8 Hz, 12H, CH<sub>3</sub>), 1.25 (d, J = 6.9 Hz, 12H, CH<sub>3</sub>). <sup>13</sup>C{<sup>1</sup>H} DEPT Q NMR (CDCl<sub>3</sub>, 101 MHz): δ<sub>C</sub> 162.8 (C-S), 147.1 (Ar C), 131.5 (Ar CH), 130.0 (Ar C), 124.8 (Ar CH), 115.1 (N(CH)<sub>2</sub>N), 29.6 (CHMe<sub>2</sub>), 24.1 (CH<sub>3</sub>), 24.0 (CH<sub>3</sub>). **CHN calculated for C<sub>27</sub>H<sub>34</sub>I<sub>2</sub>Cl<sub>2</sub>N<sub>2</sub>Se:** C, 43.63; H, 4.61; N, 3.77. Found: C, 43.81; H, 4.64; N, 3.96.

**[(I<sub>2</sub>)-S(ICy)]:** m = 178.3 mg. <sup>1</sup>H NMR (CDCl<sub>3</sub>, 400 MHz): δ<sub>H</sub> 7.12 (s, 2H, N(CH)<sub>2</sub>N), 4.69 (tt, 2H, J = 4 Hz, NCH), 2.17-2.15 (m, 4H, CH<sub>2</sub>), 1.97-1.91 (m, 4H, CH<sub>2</sub>), 1.82-1.79 (m, 2H, CH<sub>2</sub>), 1.60-1.45 (m, 8H, CH<sub>2</sub>), 1.29-1.19 (m, 2H, CH<sub>2</sub>). <sup>13</sup>C{<sup>1</sup>H} DEPT Q NMR (CDCl<sub>3</sub>, 101 Hz): δ<sub>C</sub> 147.3 (C-S), 118.2 (N(CH)<sub>2</sub>N), 58.4 (NCH), 33.2 (CH<sub>2</sub>), 25.5 (CH<sub>2</sub>), 25.2 (CH<sub>2</sub>).

**[(I<sub>2</sub>)-S(IPr\*)]:** m = 114.1 mg. <sup>1</sup>H NMR (CDCl<sub>3</sub>, 400 MHz): 7.28 (d, J = 8 Hz, 8H, Ar CH), 7.25-7.18 (m, 24H, Ar CH), 6.82-6.79 (m, 12H, Ar CH), 5.37 (s, 4H, CH(Ph)<sub>2</sub>), 5.24 (s, 2H, N(CH<sub>2</sub>)<sub>2</sub>N), 2.24 (s, 6H, CH<sub>3</sub>). <sup>13</sup>C{<sup>1</sup>H} DEPT Q NMR (CDCl<sub>3</sub>, 101 MHz): δ<sub>C</sub> 160.8 (C-S) (determined by HMBC), 143.0 (Ar C), 141.7 (Ar C), 140.2 (Ar C), 139.4 (Ar C), 132.5 (Ar C), 130.6 (Ar C), 130.2 (Ar CH), 129.4 (Ar CH), 128.5 (Ar CH), 128.3 (Ar CH), 126.7 (Ar CH), 126.6 (Ar CH), 120.1 (CH<sub>imid</sub>), 51.9 (CHPh<sub>2</sub>), 22.1 (CH<sub>3</sub>).



# NMR spectra

[SeBr<sub>2</sub>(IPr)]

<sup>1</sup>H NMR

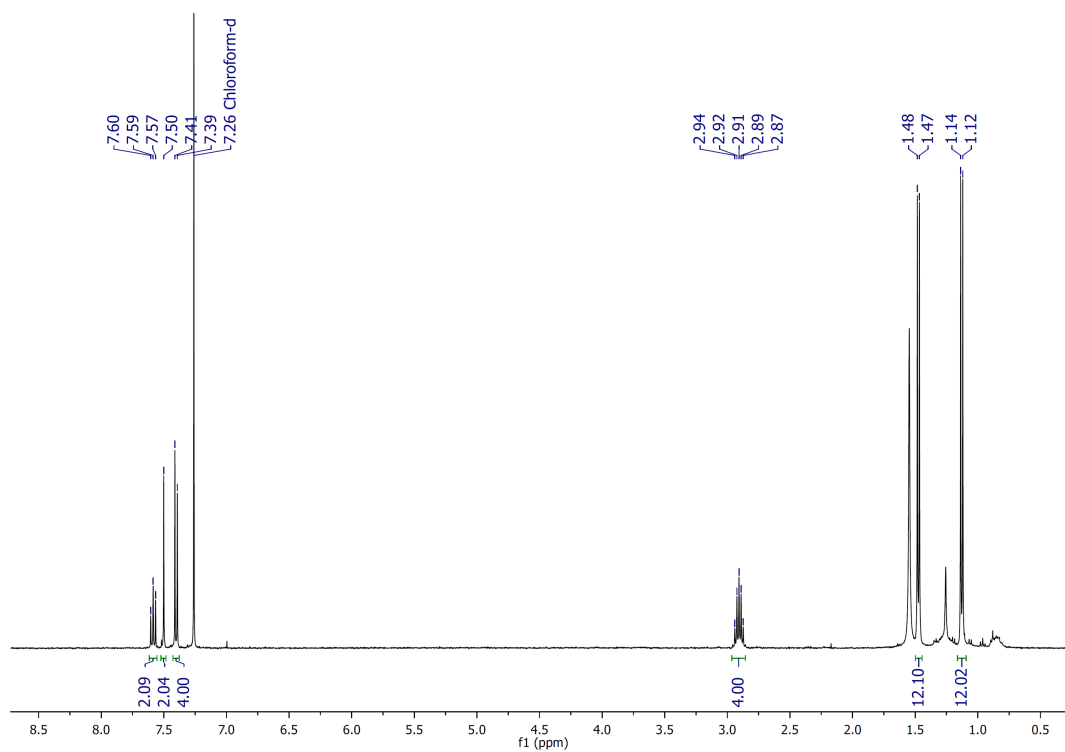

<sup>13</sup>C{<sup>1</sup>H} DEPT Q NMR

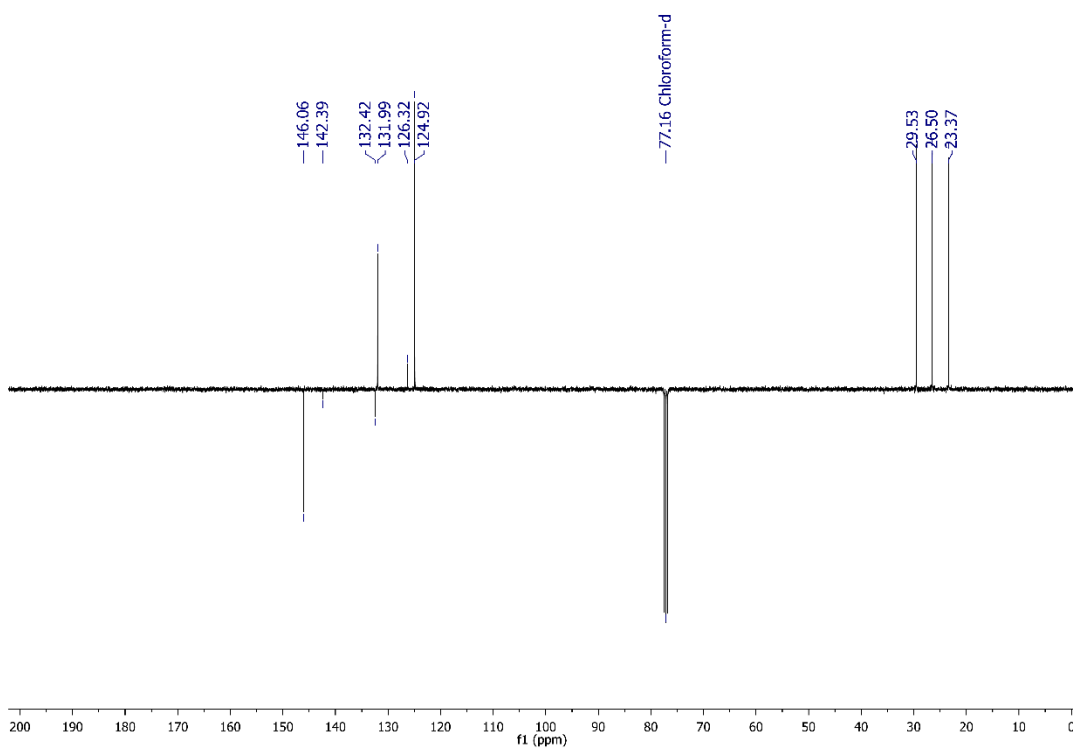

$^{77}\text{Se}$  NMR

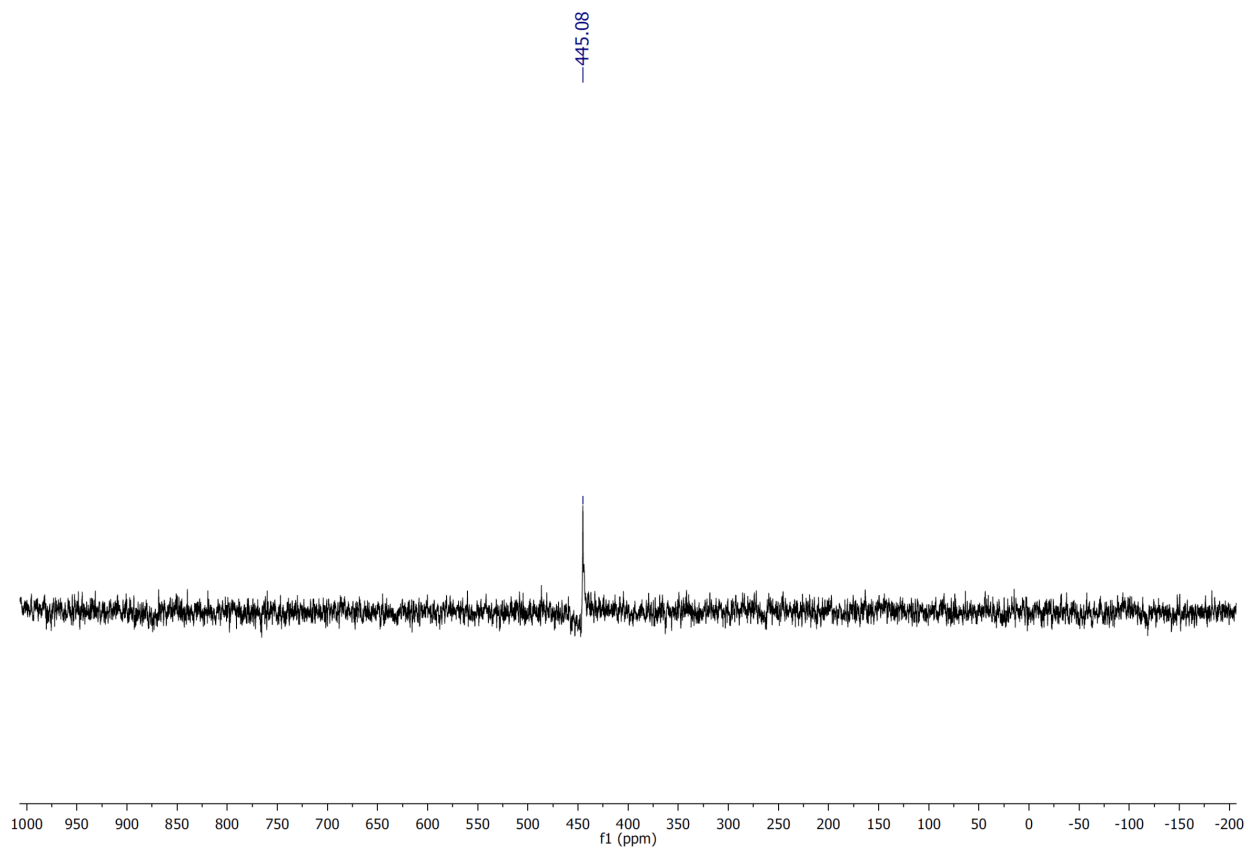

[SeBr(SiPr)]Br<sub>3</sub>  
<sup>1</sup>H NMR

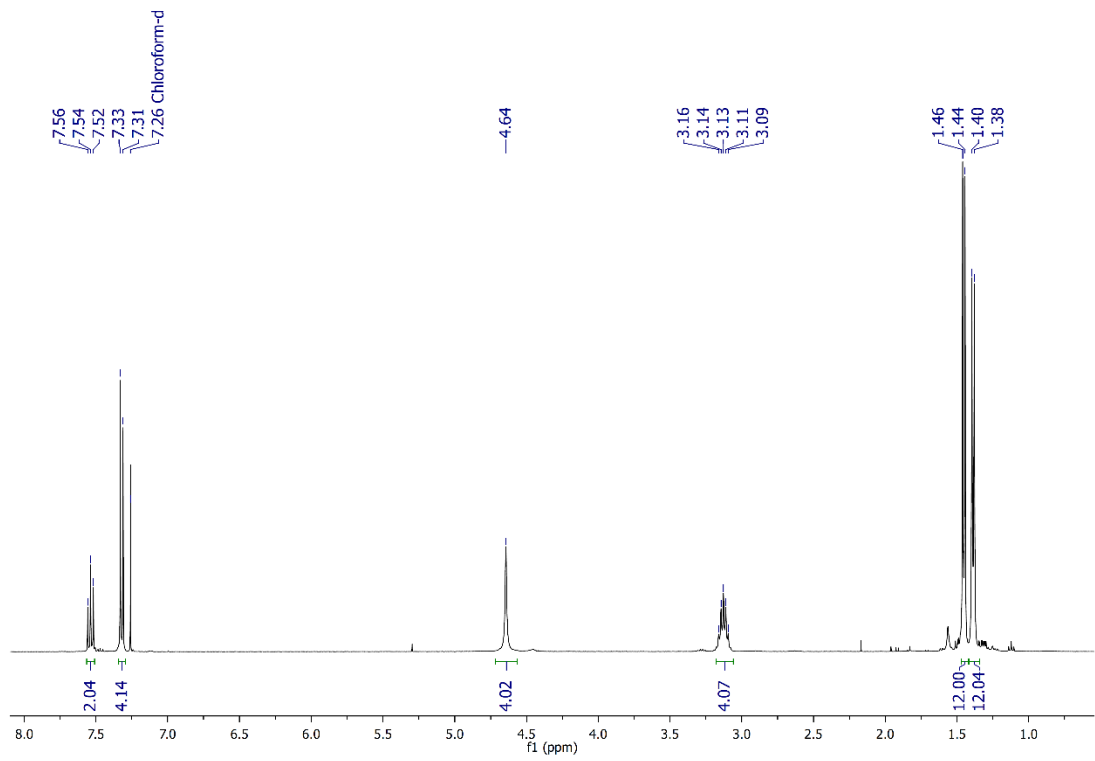

<sup>13</sup>C{<sup>1</sup>H} DEPT Q NMR

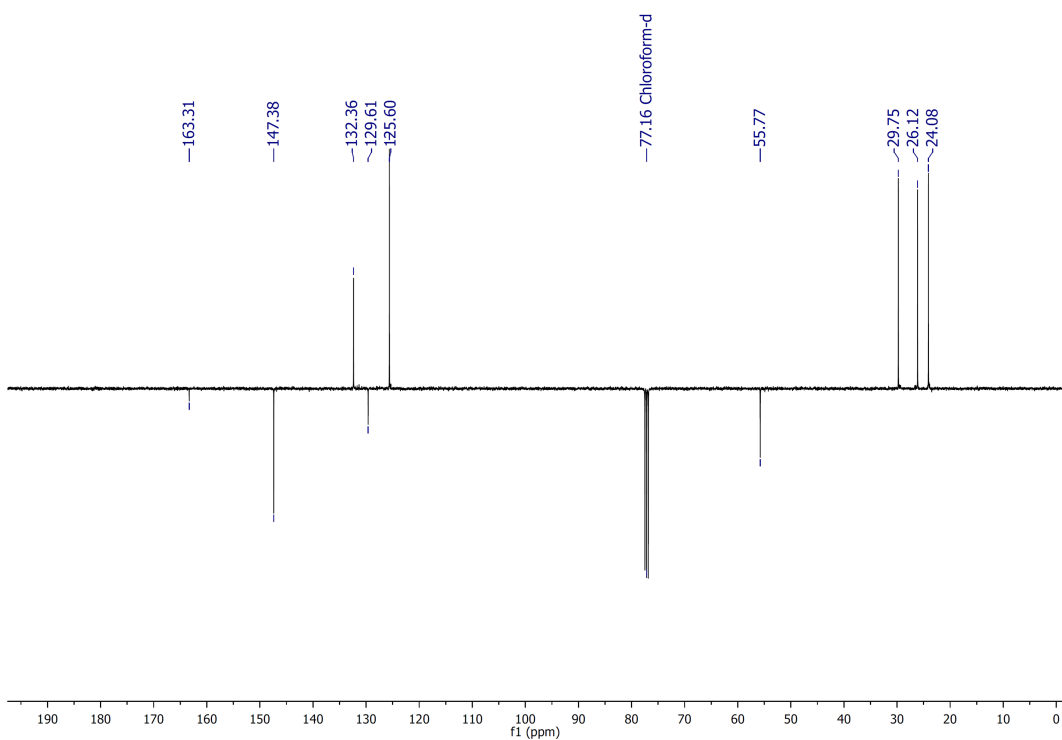

$^{77}\text{Se}$  NMR

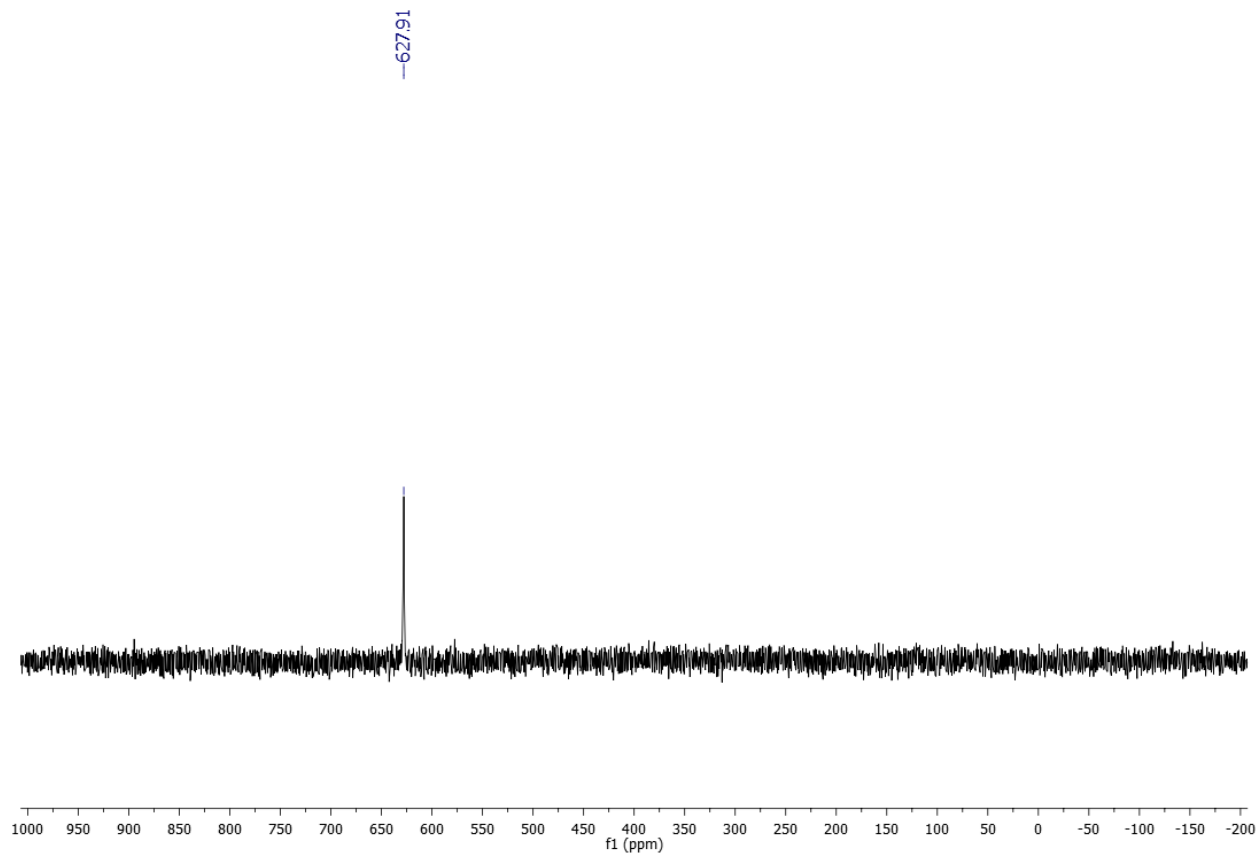

[SeBr<sub>2</sub>(IMes)]  
<sup>1</sup>H NMR

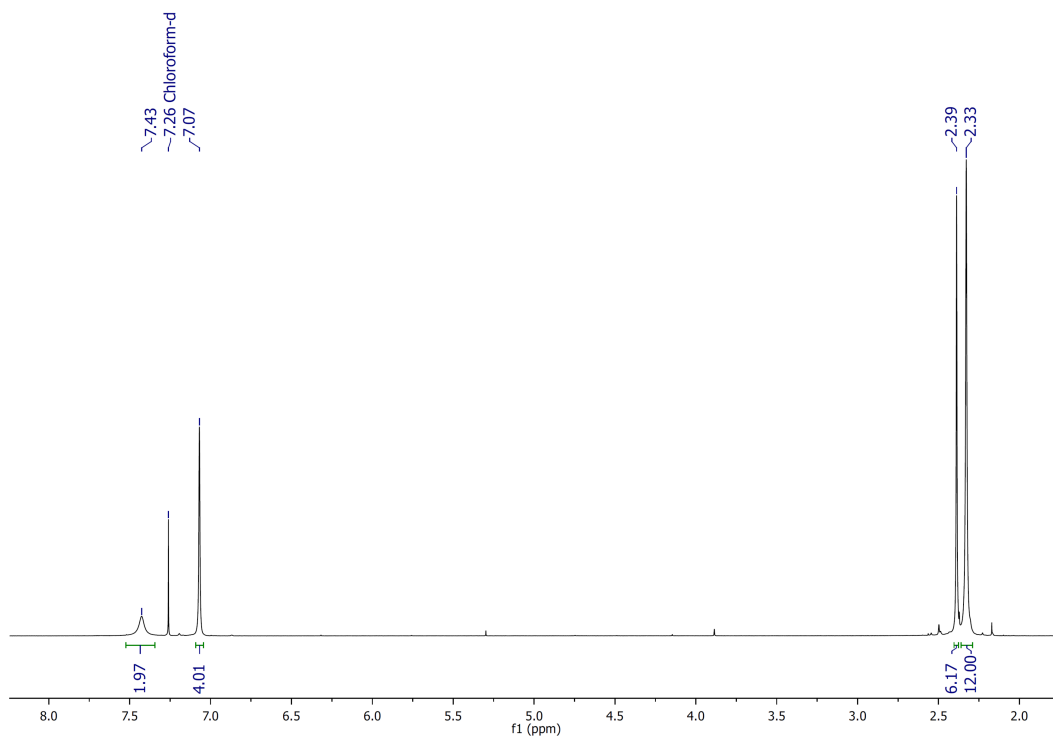

<sup>13</sup>C{<sup>1</sup>H} DEPT Q NMR

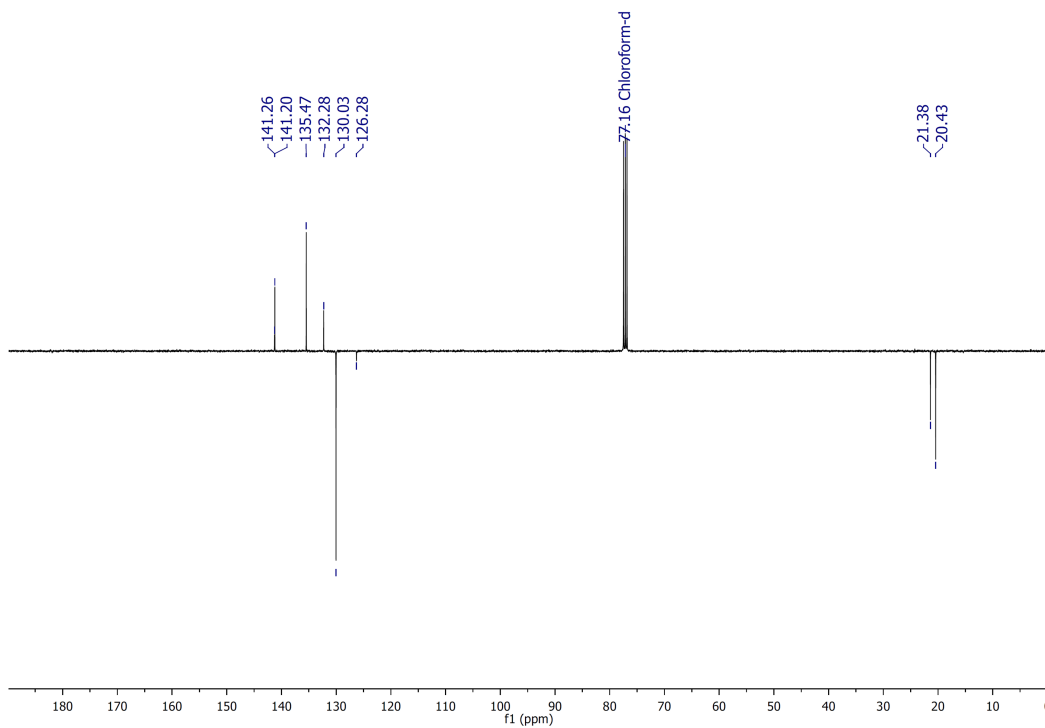

$^{77}\text{Se}$  NMR

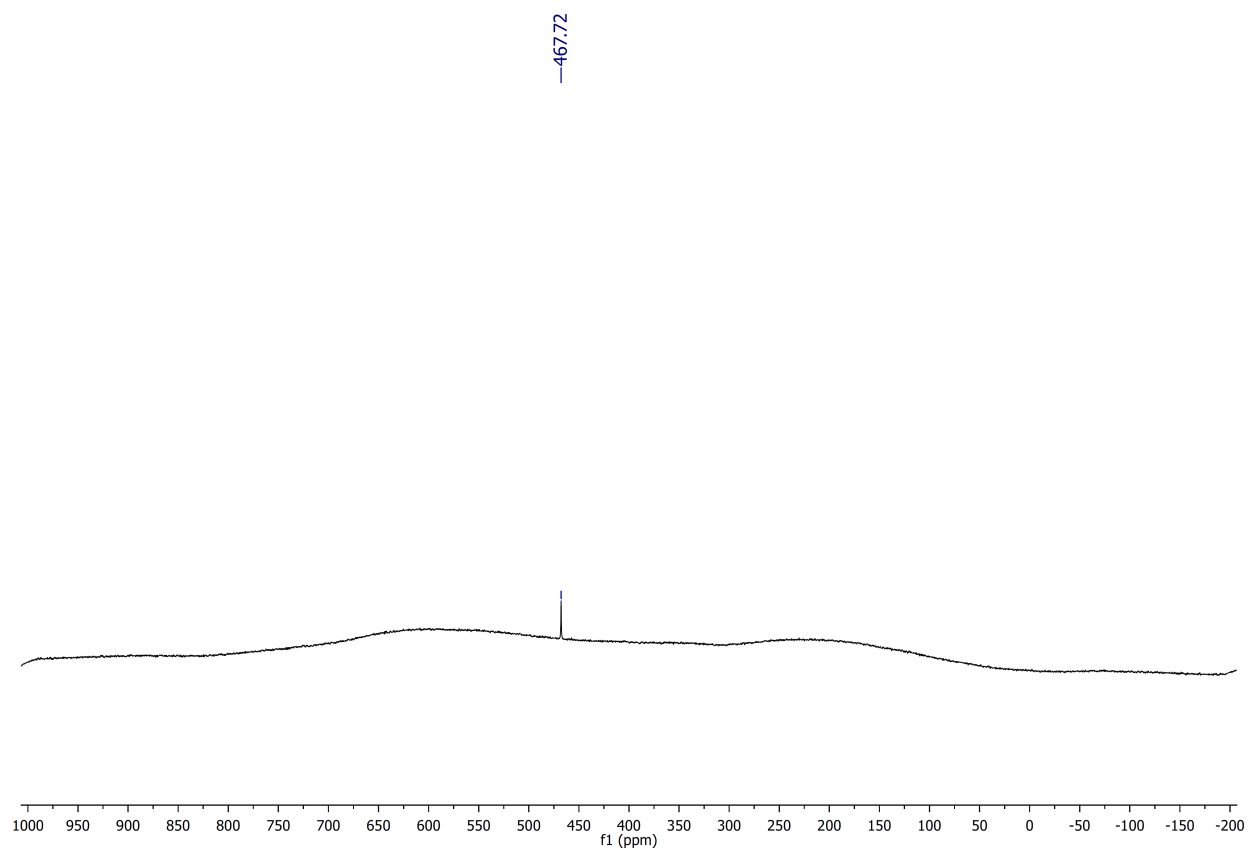

[SeBr<sub>2</sub>(SImes)]

<sup>1</sup>H NMR

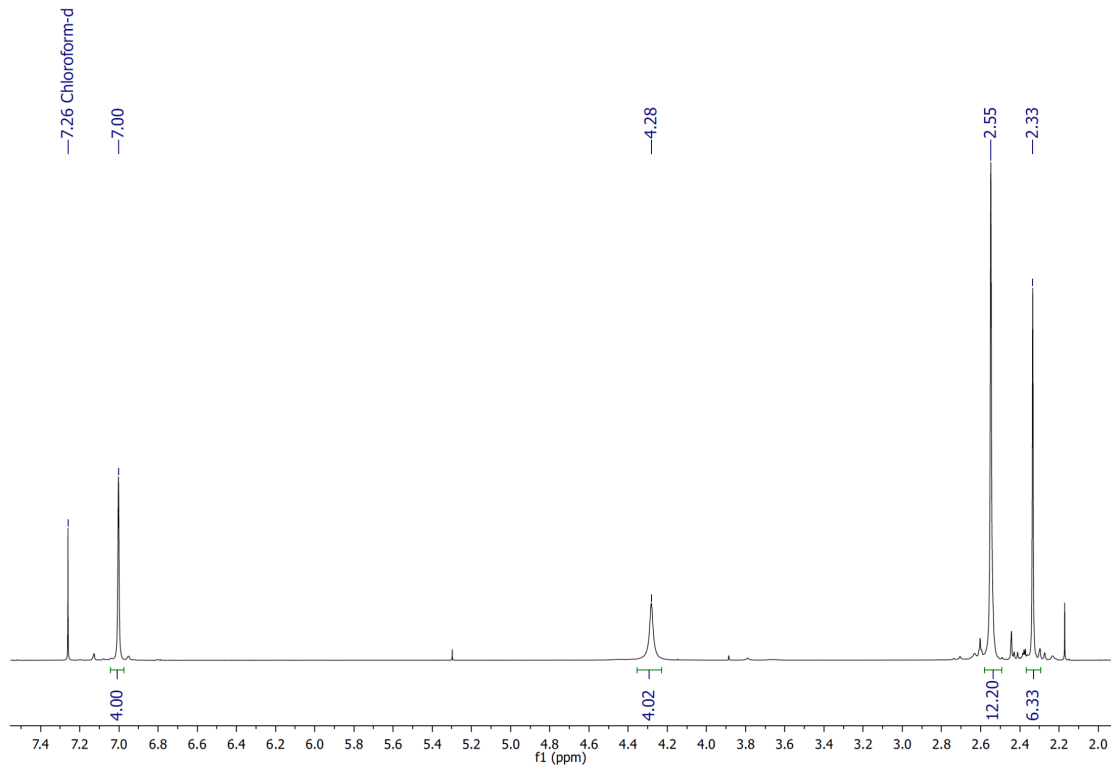

<sup>13</sup>C{<sup>1</sup>H} DEPT Q NMR

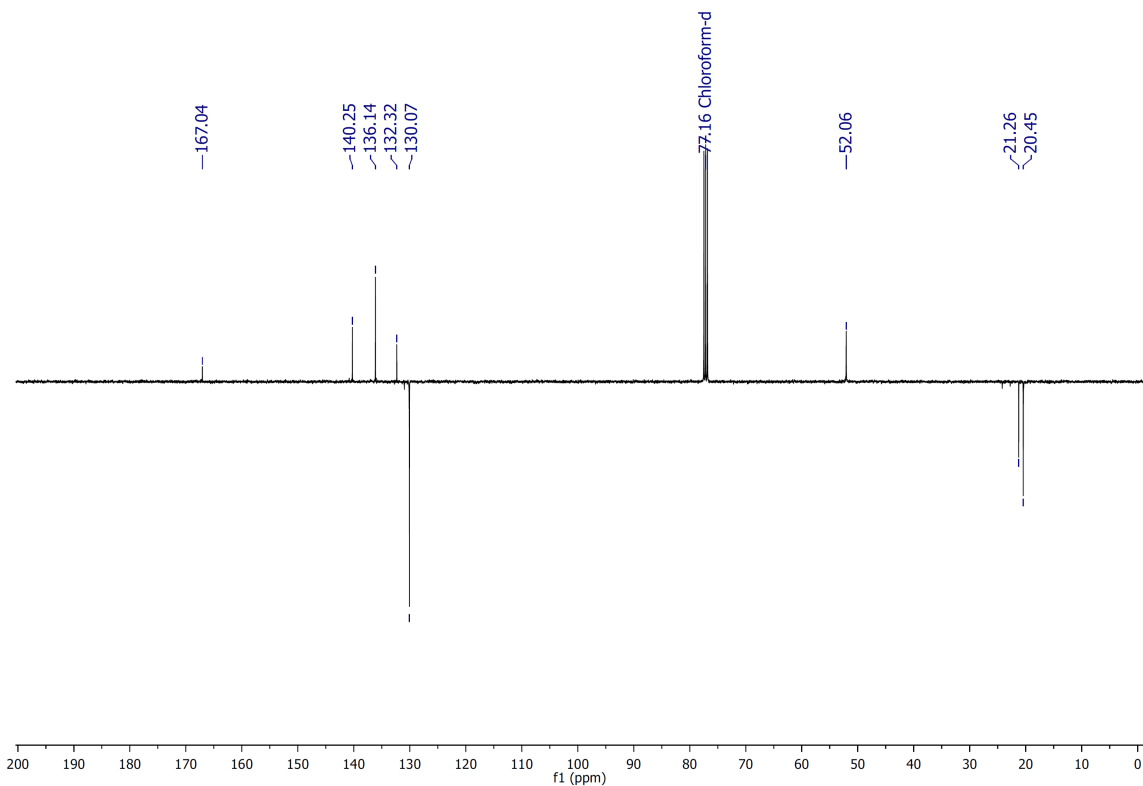

$^{77}\text{Se}$  NMR

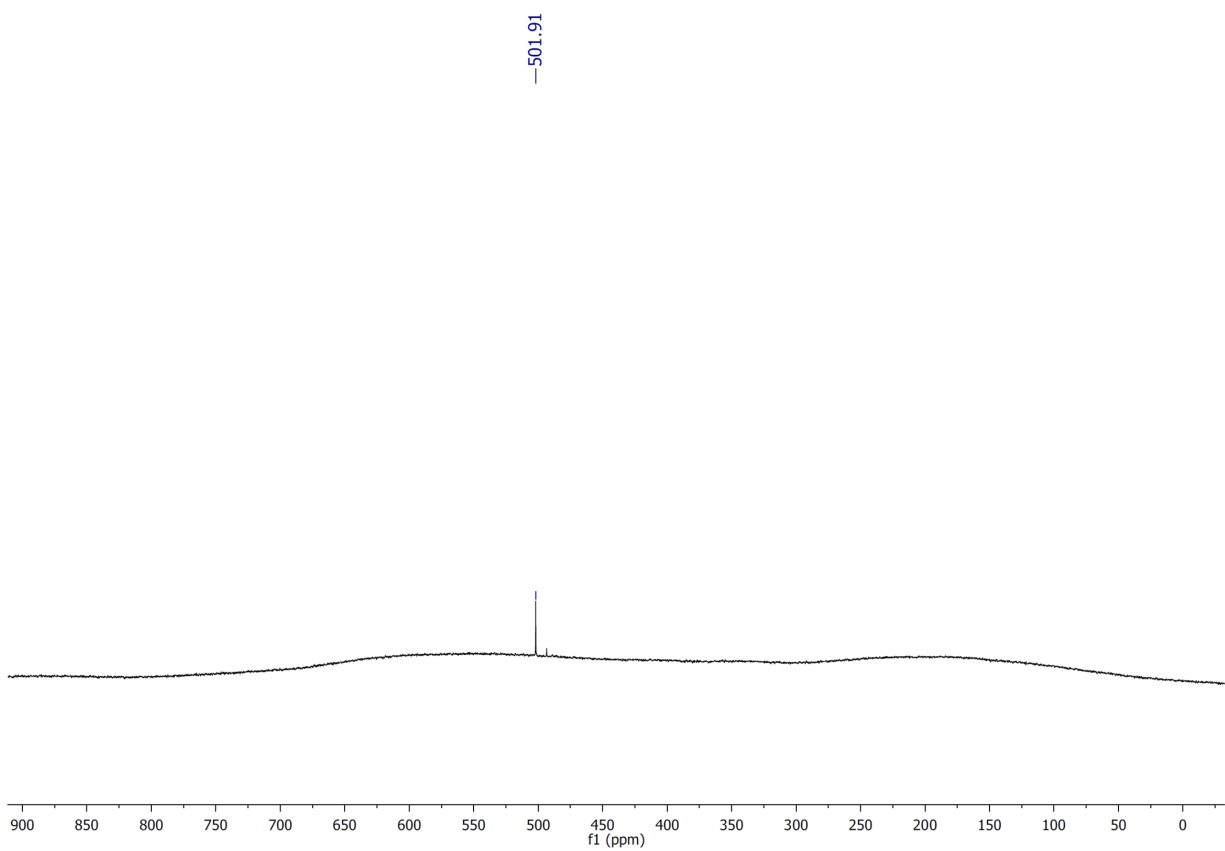



[SeBr<sub>2</sub>(IPr<sup>Me</sup>)]  
<sup>1</sup>H NMR

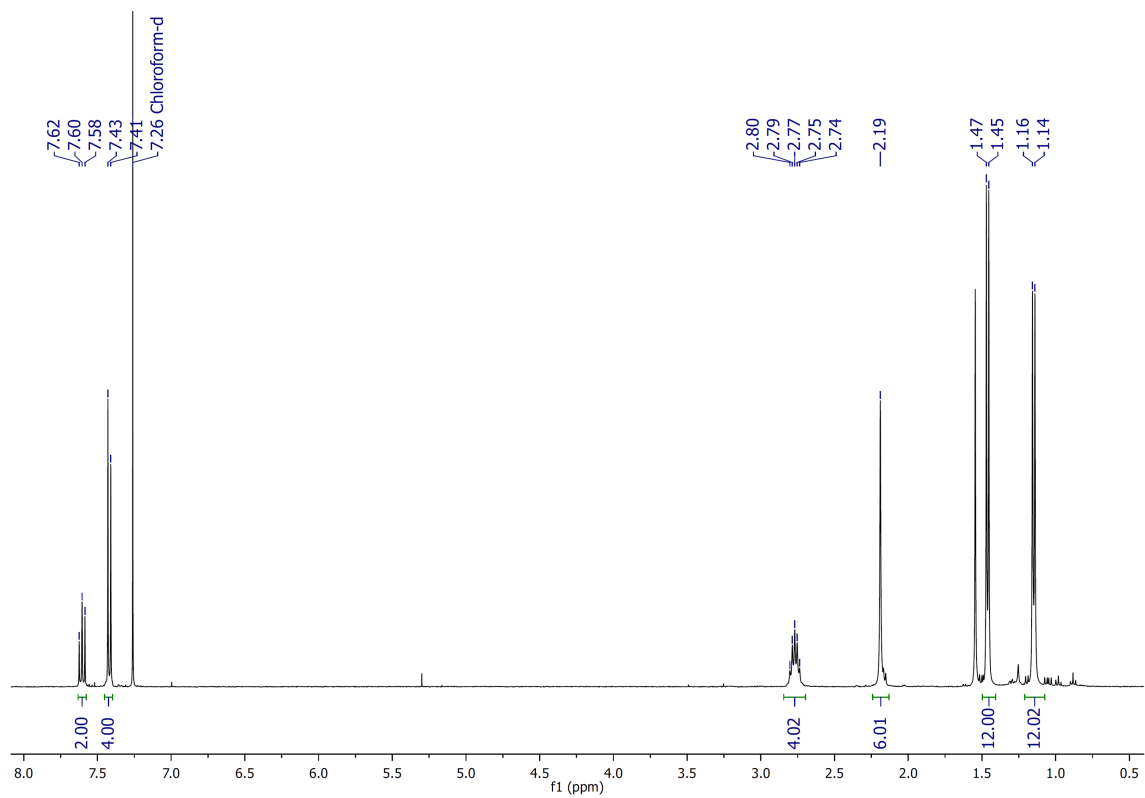

<sup>13</sup>C{<sup>1</sup>H} DEPT Q NMR

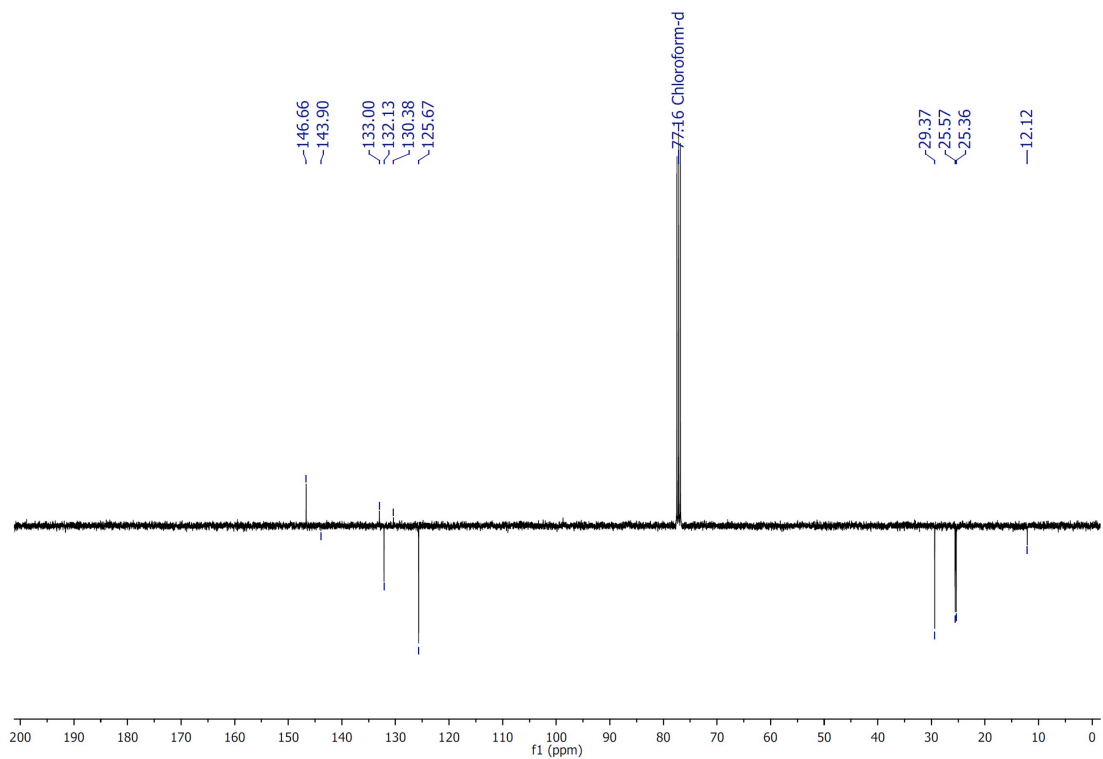

$^{77}\text{Se}$  NMR

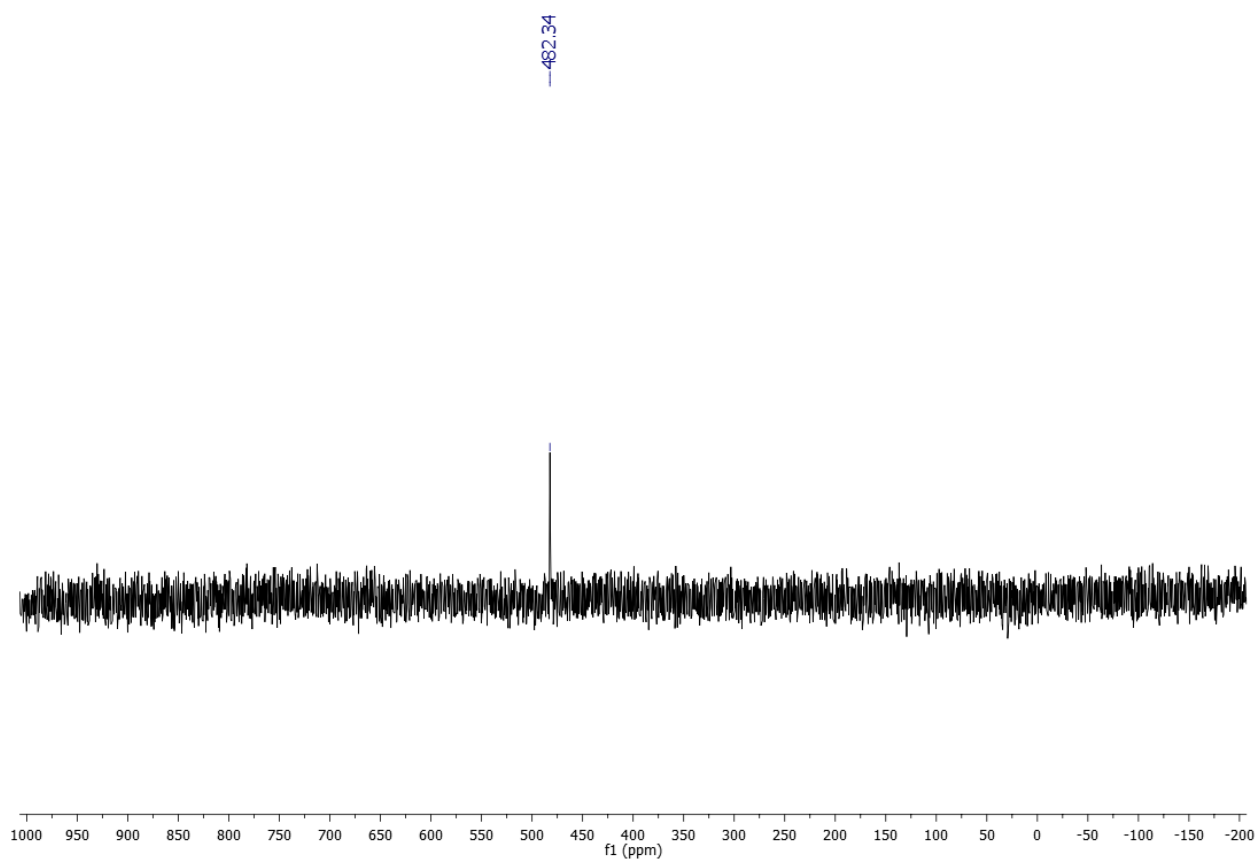

[SeBr(IPr<sup>Cl</sup>)]Br<sub>3</sub>  
<sup>1</sup>H NMR

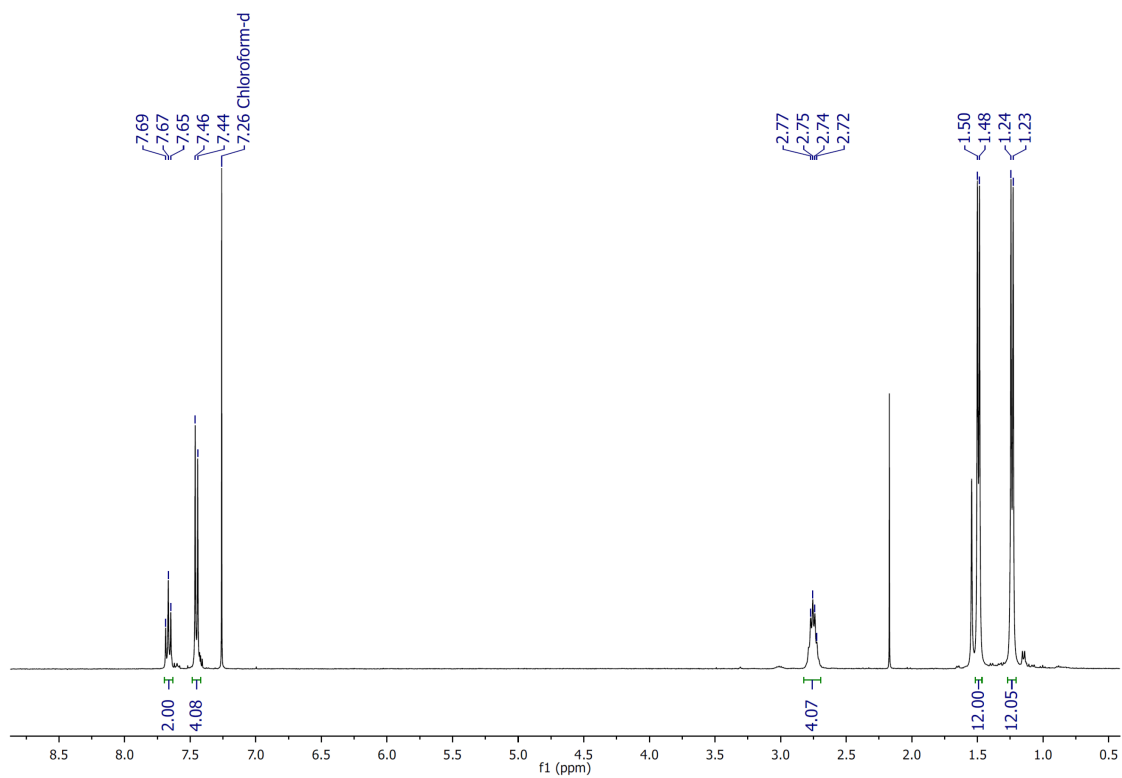

<sup>13</sup>C{<sup>1</sup>H} DEPT Q NMR

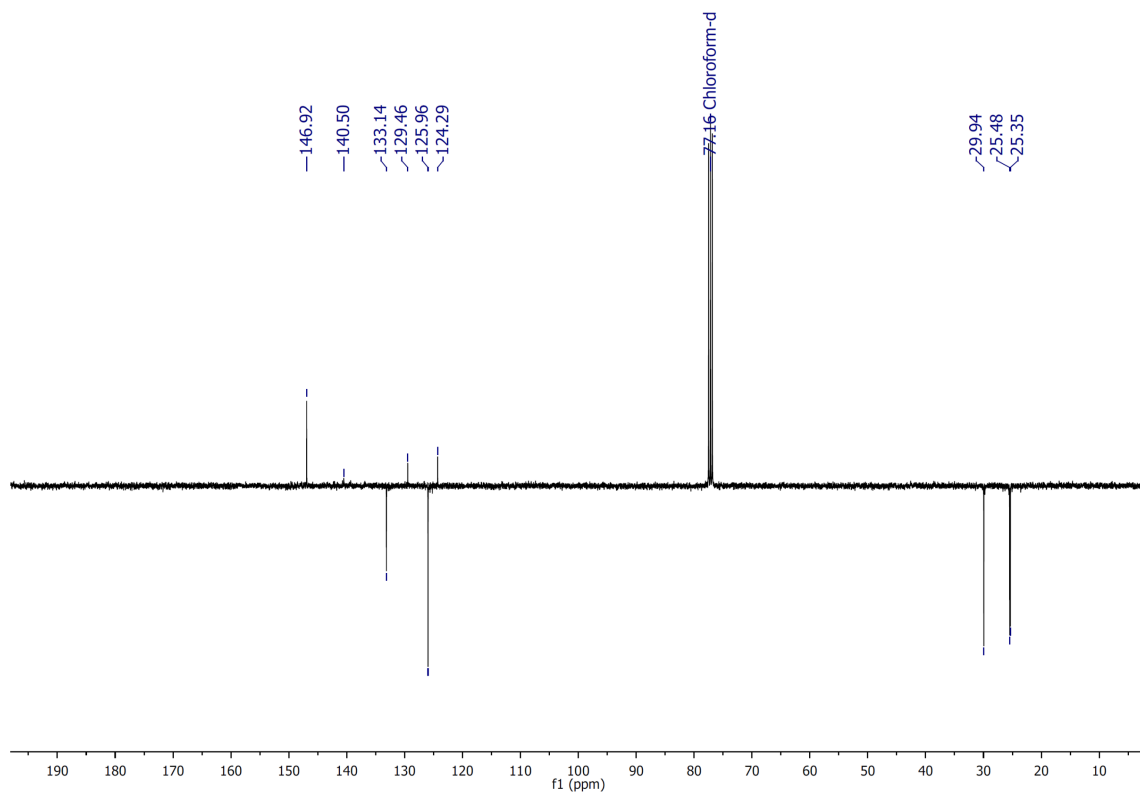

$^{77}\text{Se}$  NMR

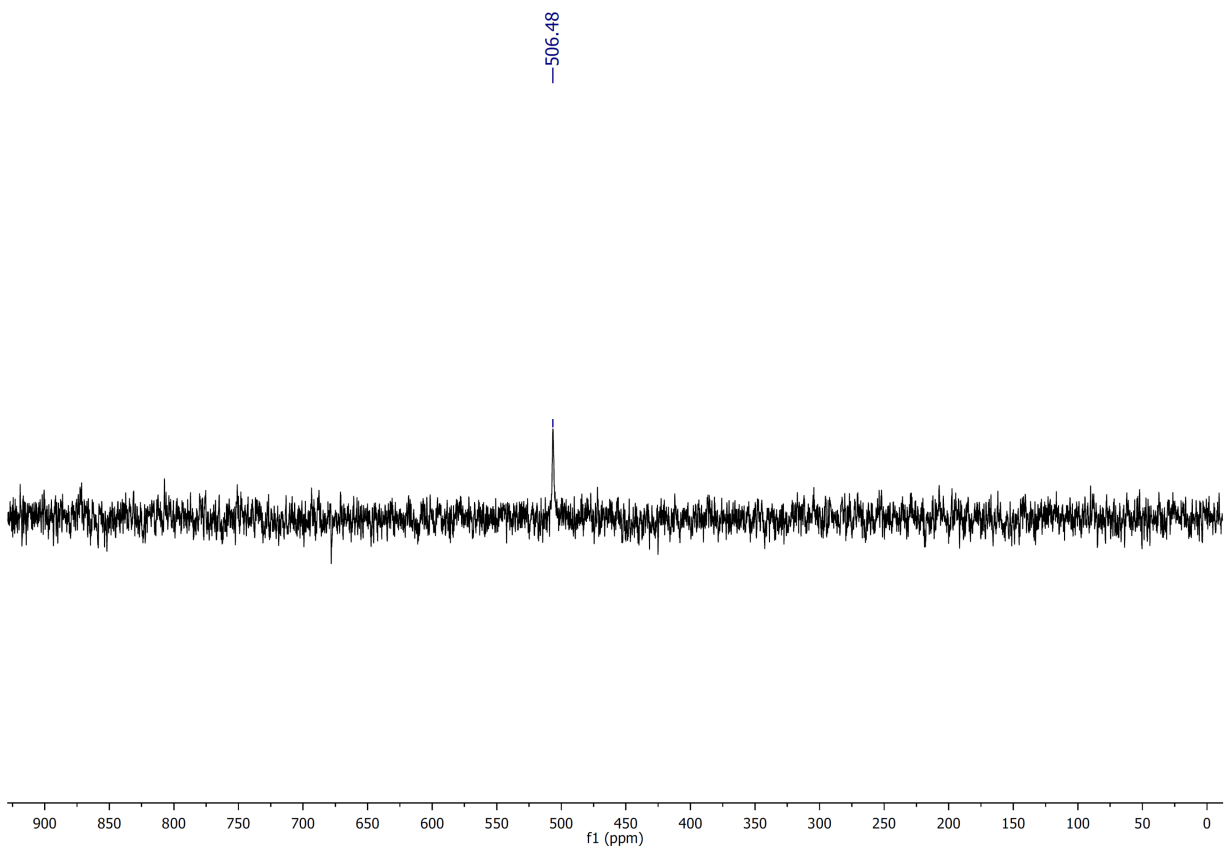

[SeBr<sub>2</sub>(ICy)]  
<sup>1</sup>H NMR

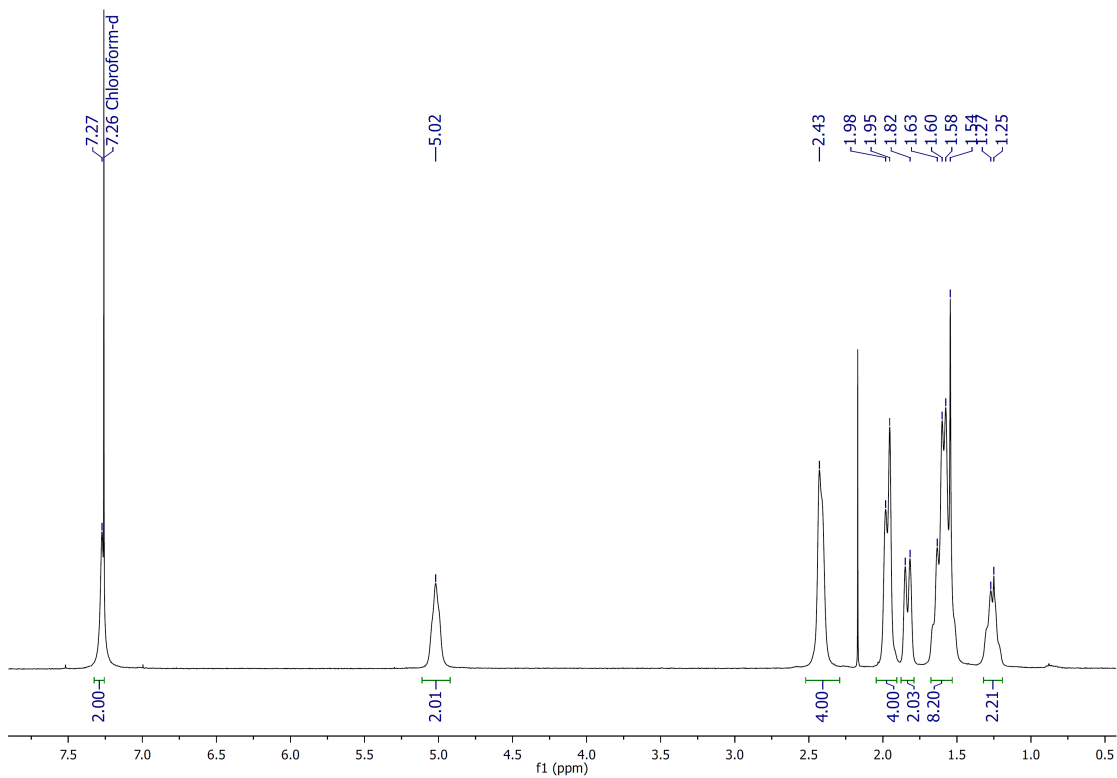

<sup>13</sup>C{<sup>1</sup>H} DEPT Q NMR

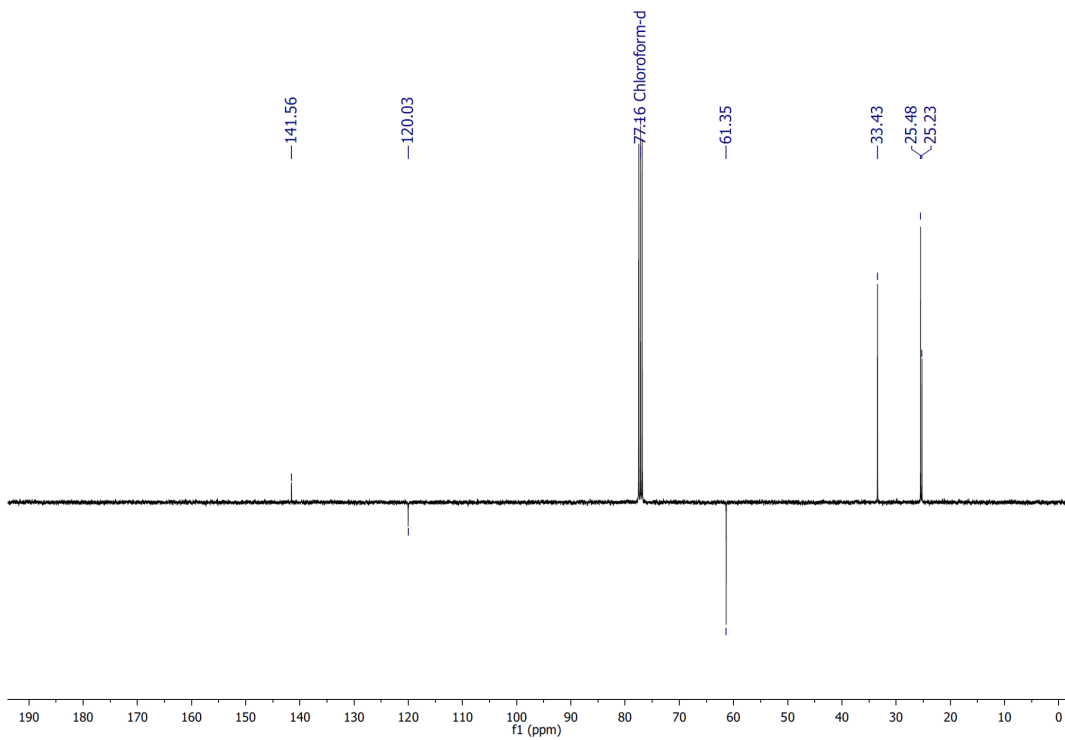

$^{77}\text{Se}$  NMR

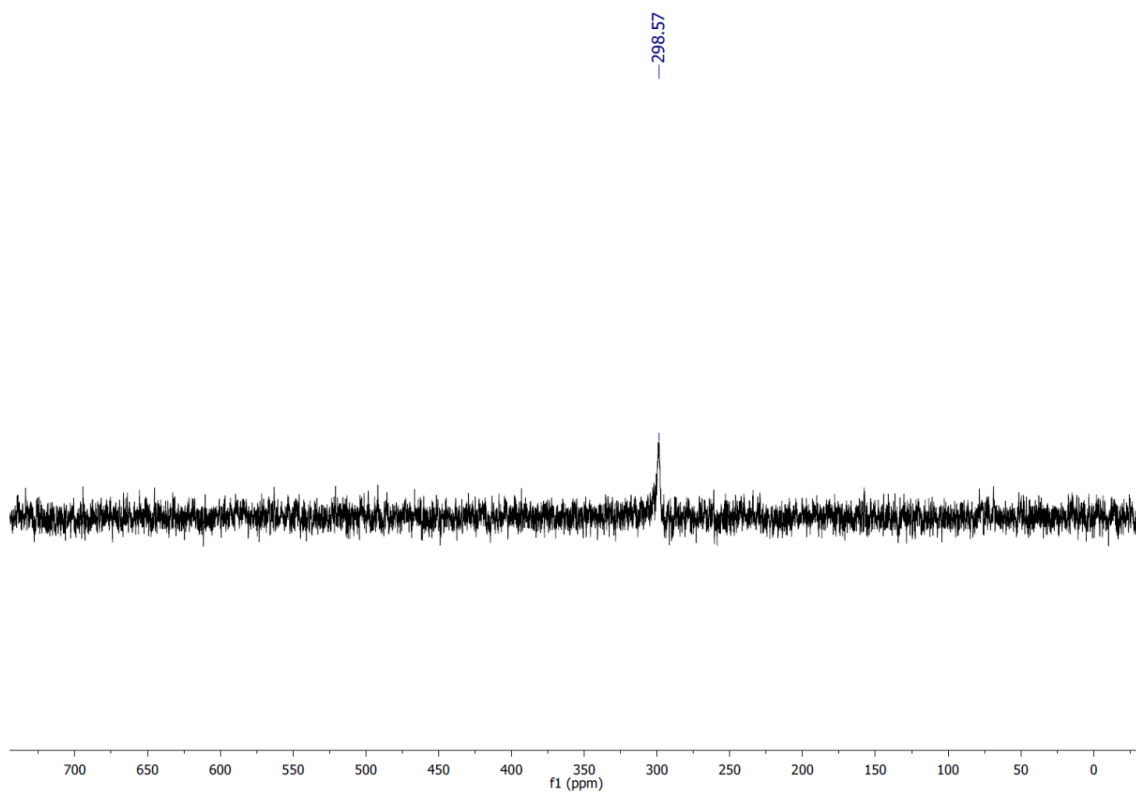

[SeBr<sub>2</sub>(IPr\*)]  
<sup>1</sup>H NMR

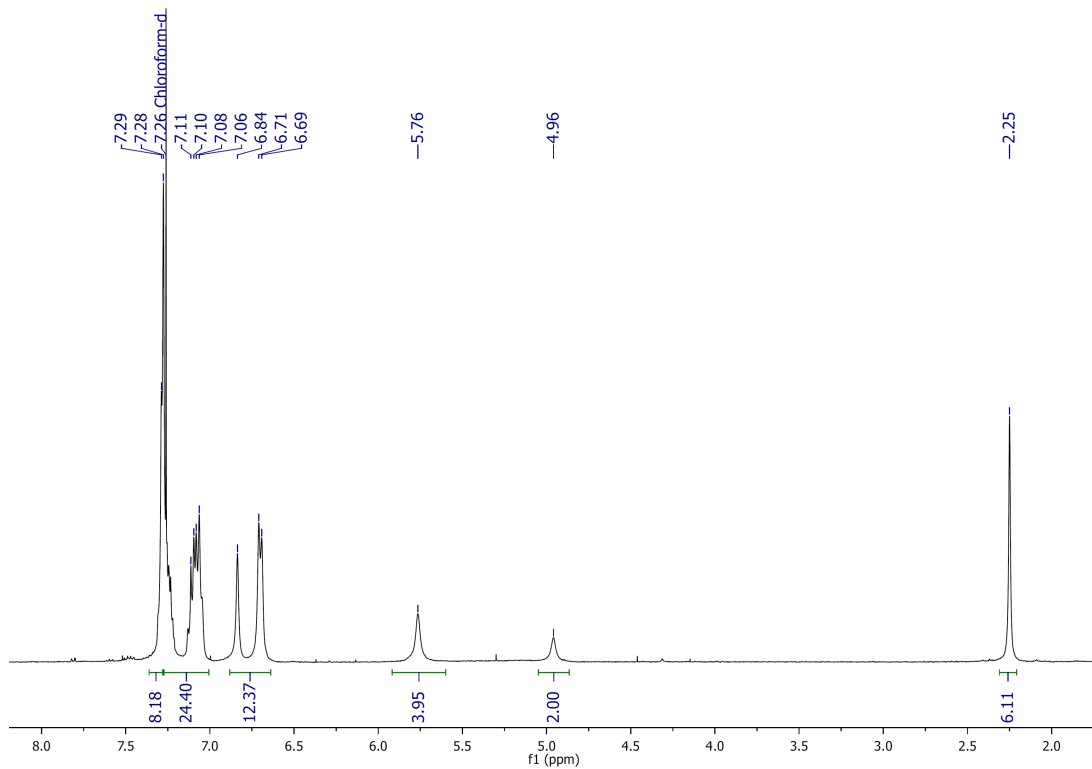

<sup>13</sup>C{<sup>1</sup>H} DEPT Q NMR

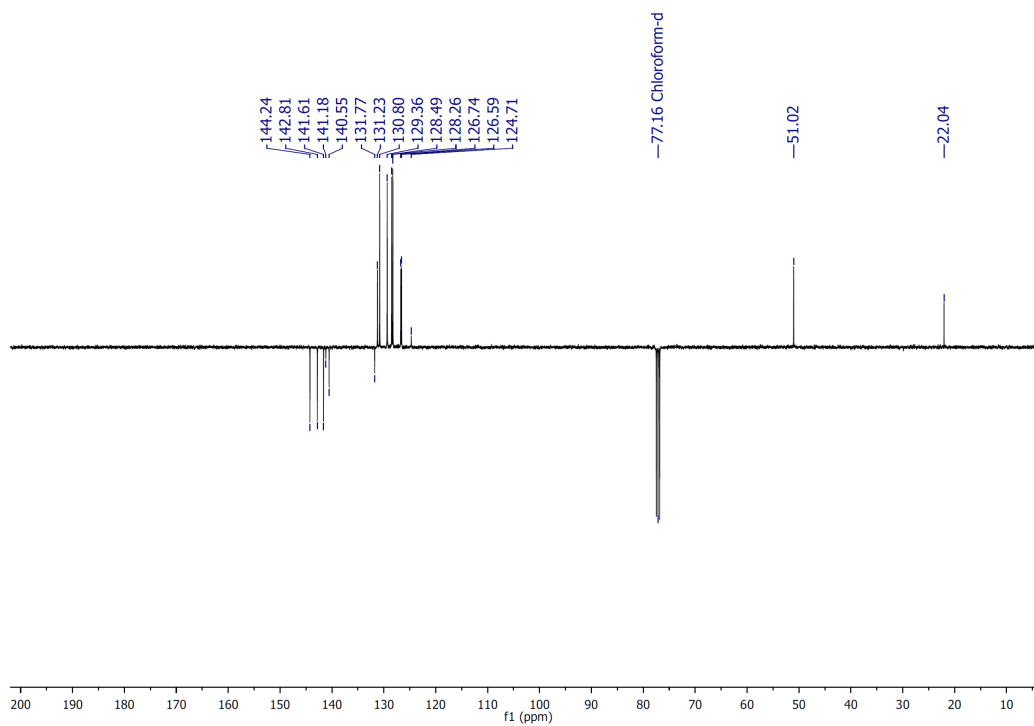

$^{77}\text{Se}$  NMR

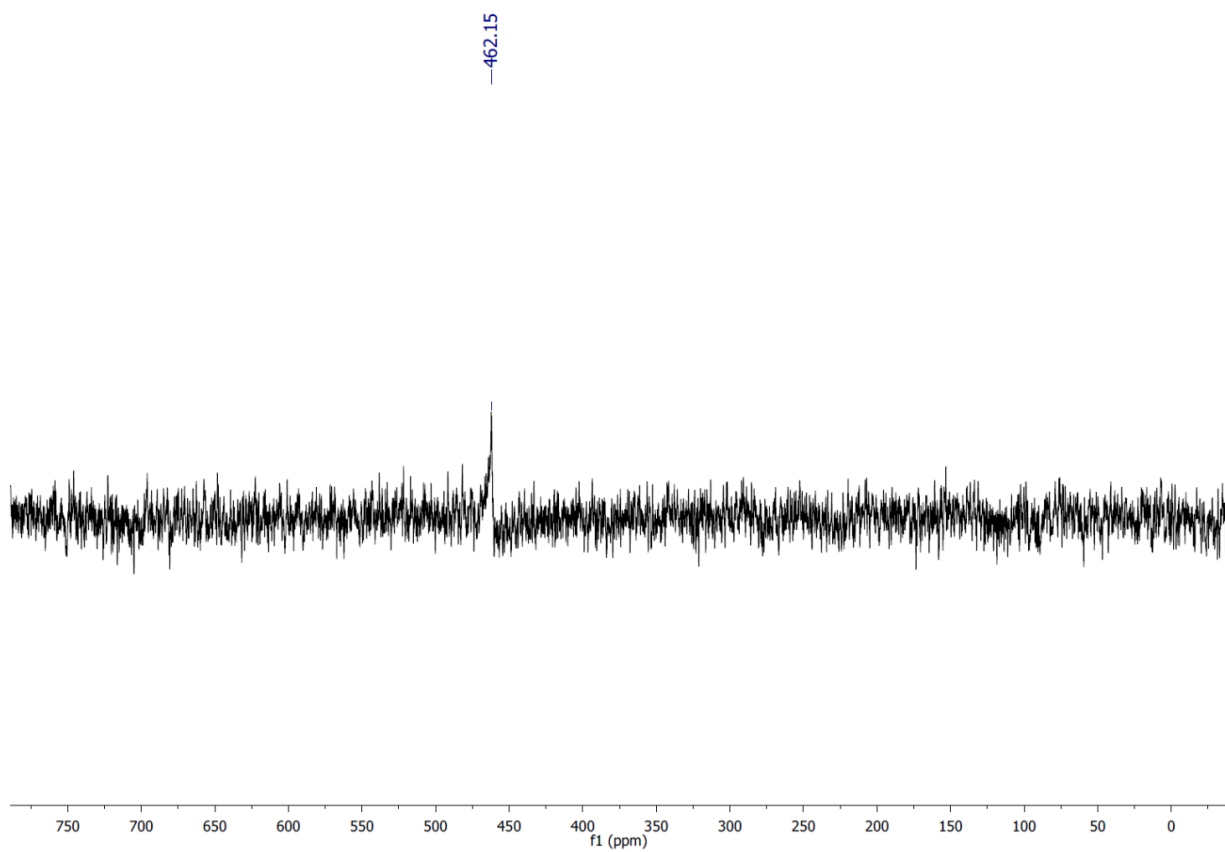



[(Br<sub>2</sub>)·S(IPr)]  
<sup>1</sup>H NMR

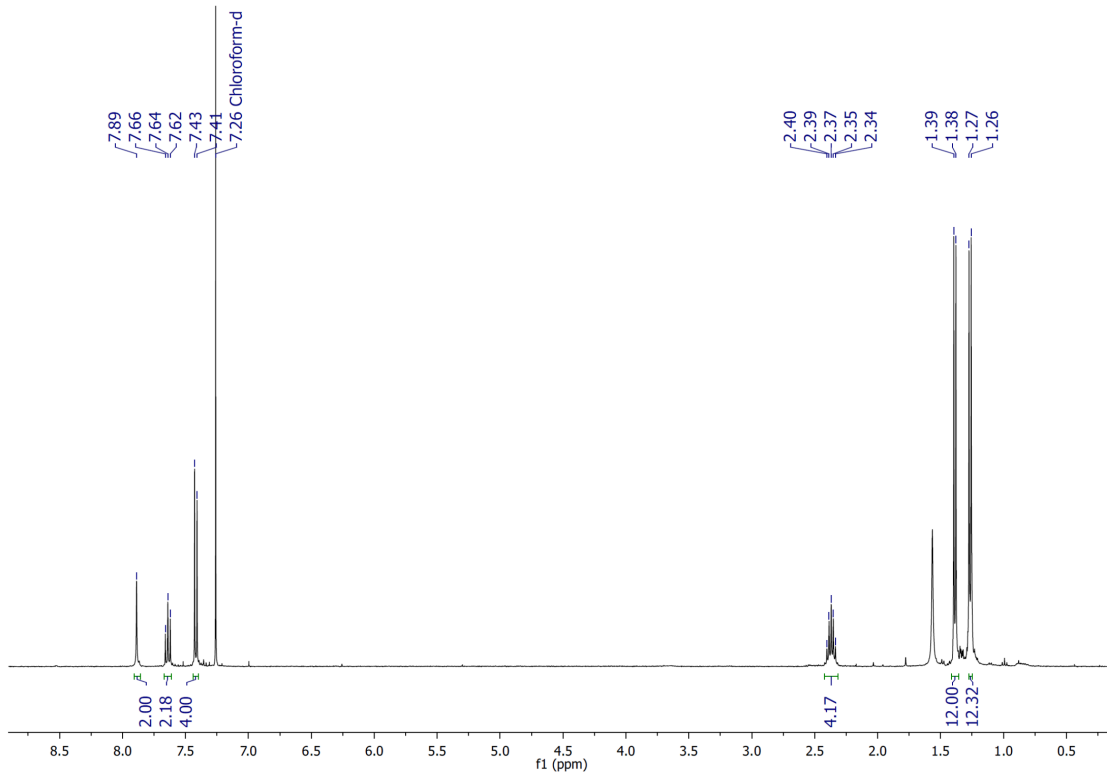

<sup>13</sup>C{<sup>1</sup>H} DEPT Q NMR

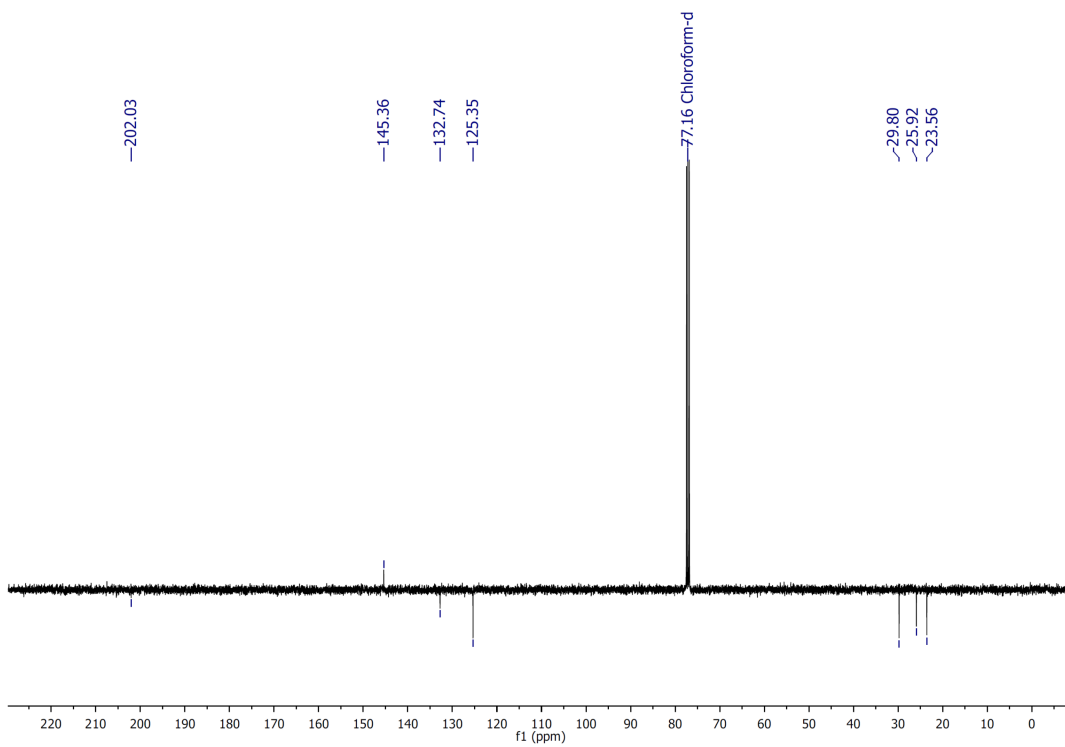

[(Br<sub>2</sub>)<sub>2</sub>S(SiPr)]  
<sup>1</sup>H NMR

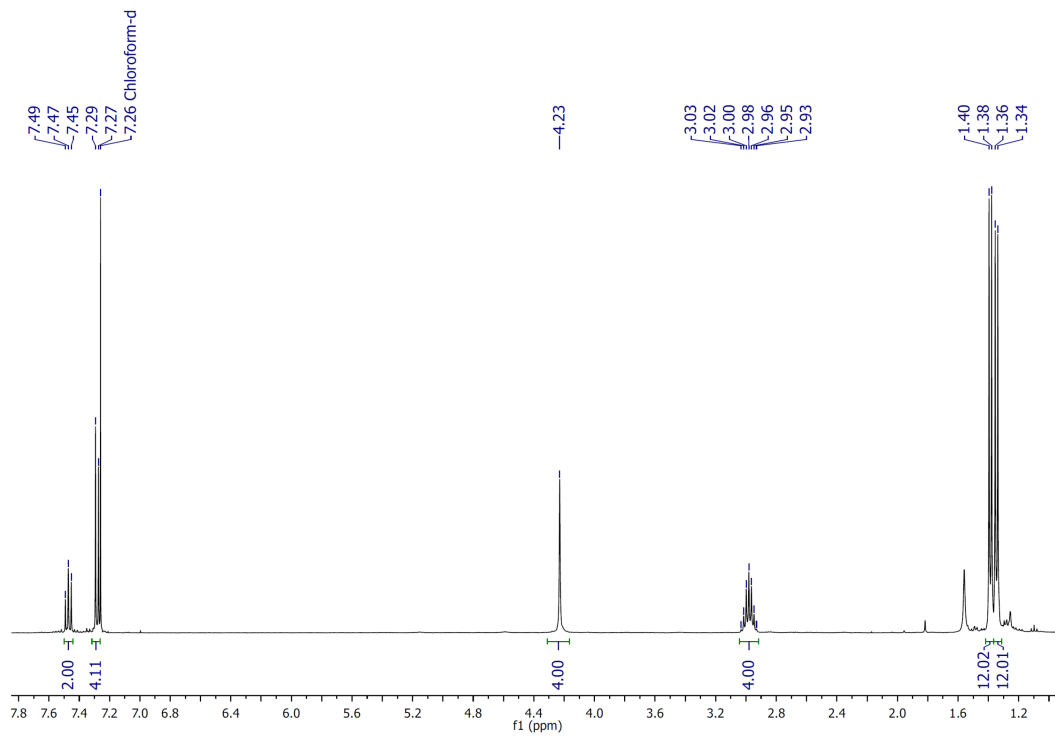

<sup>13</sup>C{<sup>1</sup>H} DEPT Q NMR

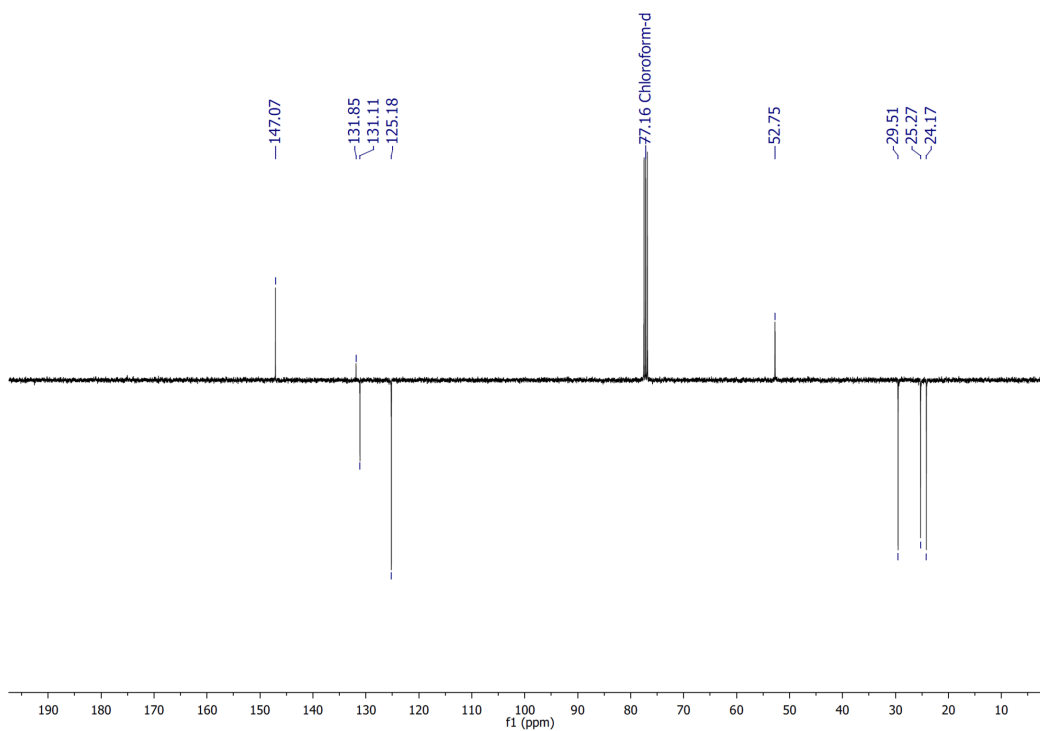

[(Br<sub>2</sub>)·S(IMes)]  
<sup>1</sup>H NMR

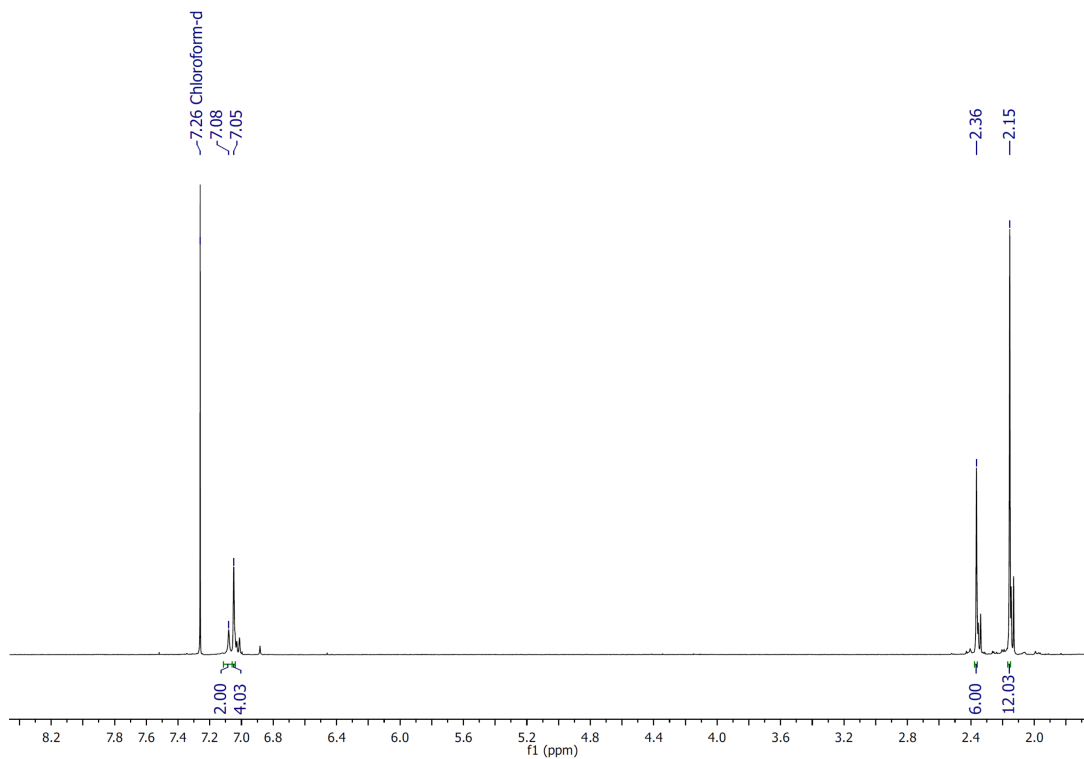

<sup>13</sup>C{<sup>1</sup>H} DEPT Q NMR

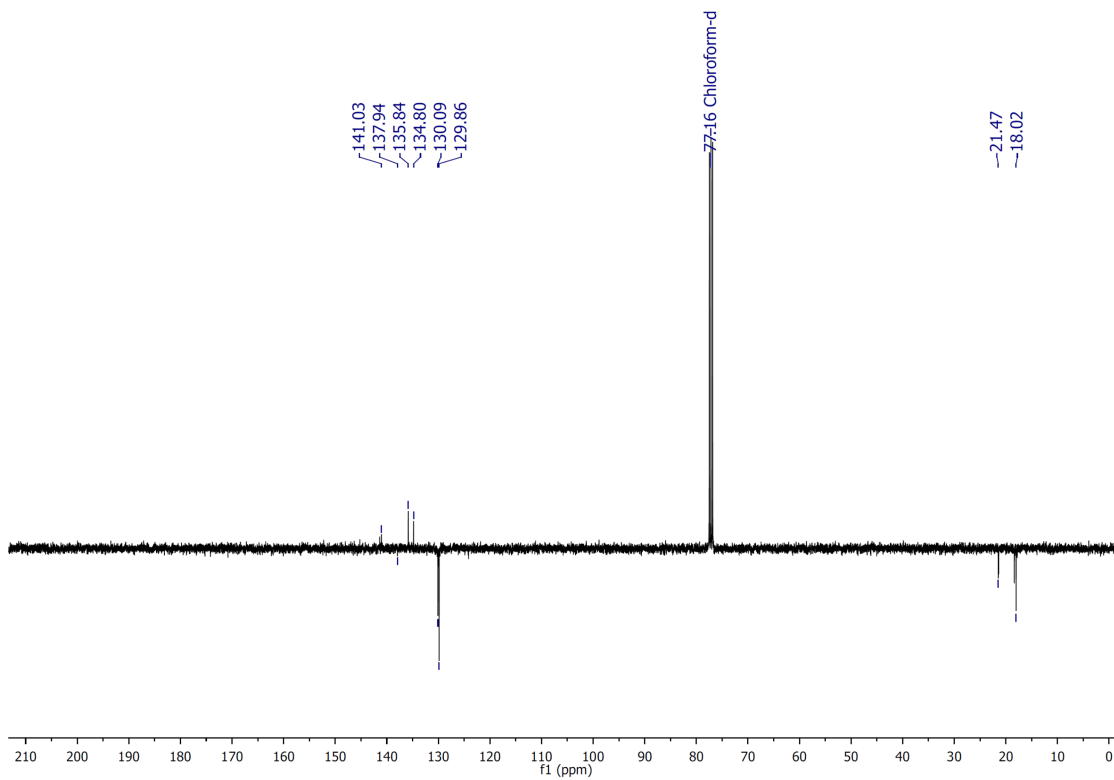

**[(Br<sub>2</sub>)·S(SiMes)<sub>2</sub>]**  
<sup>1</sup>H NMR

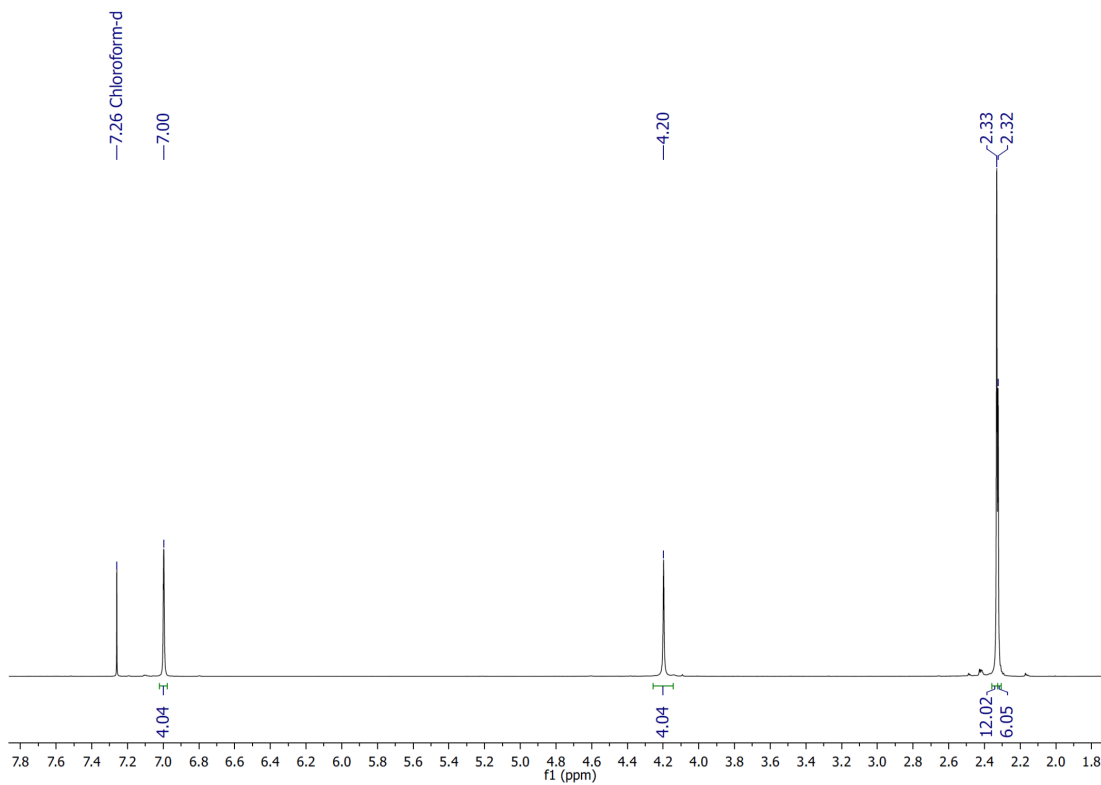

<sup>13</sup>C{<sup>1</sup>H} DEPT Q NMR

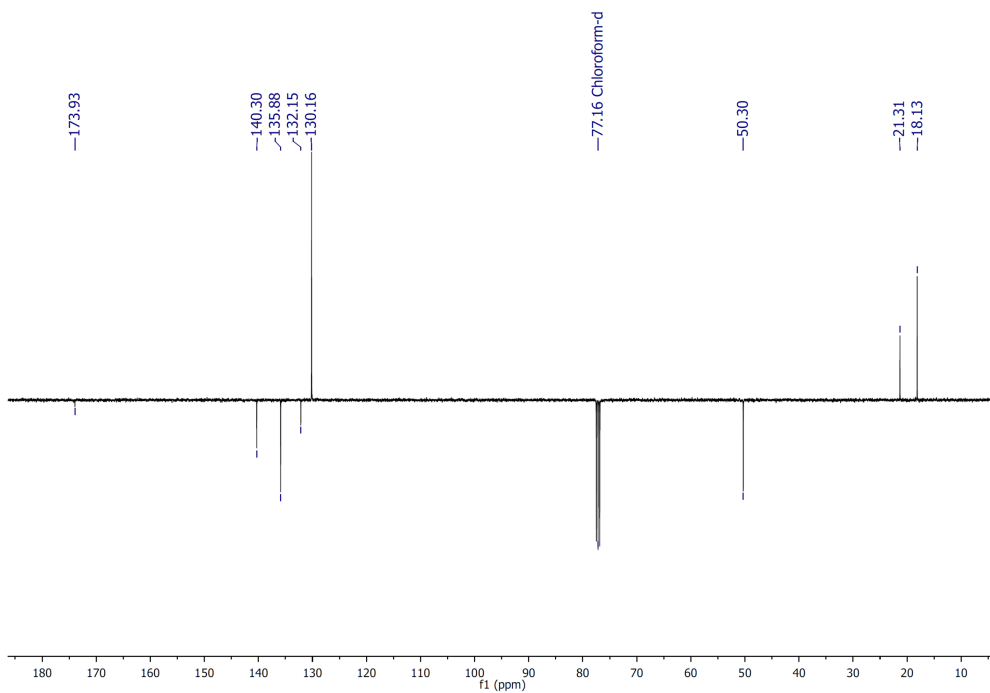

[SBr·(IPr<sup>Me</sup>)]Br<sub>3</sub>  
<sup>1</sup>H NMR

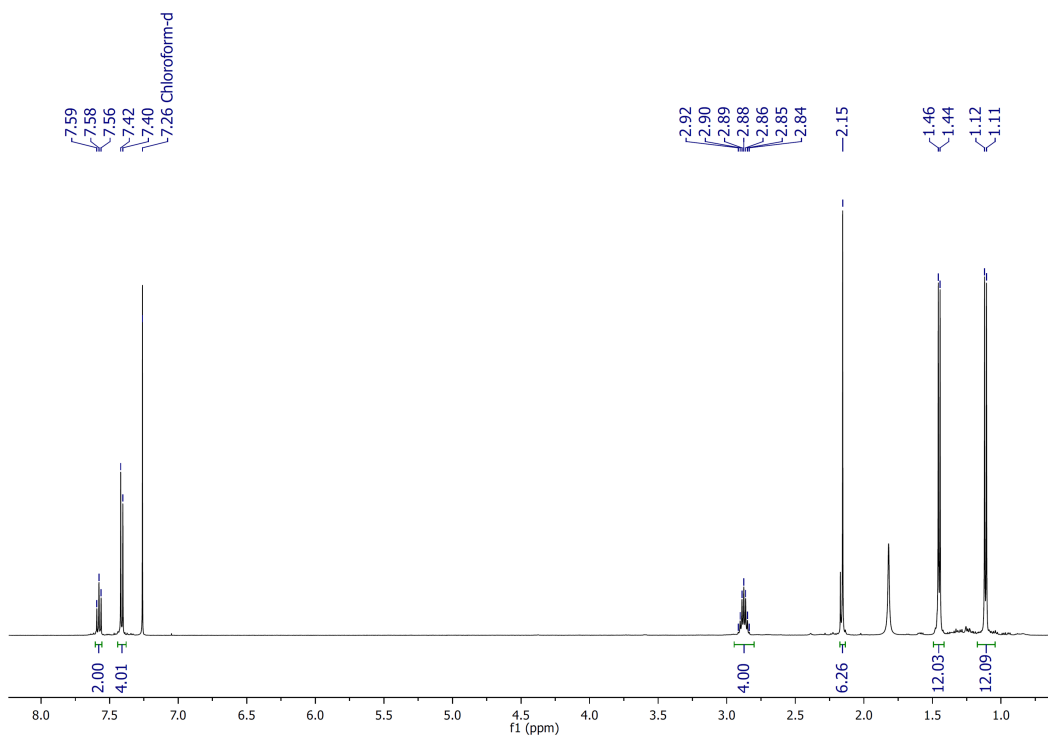

<sup>13</sup>C{<sup>1</sup>H} DEPT Q NMR

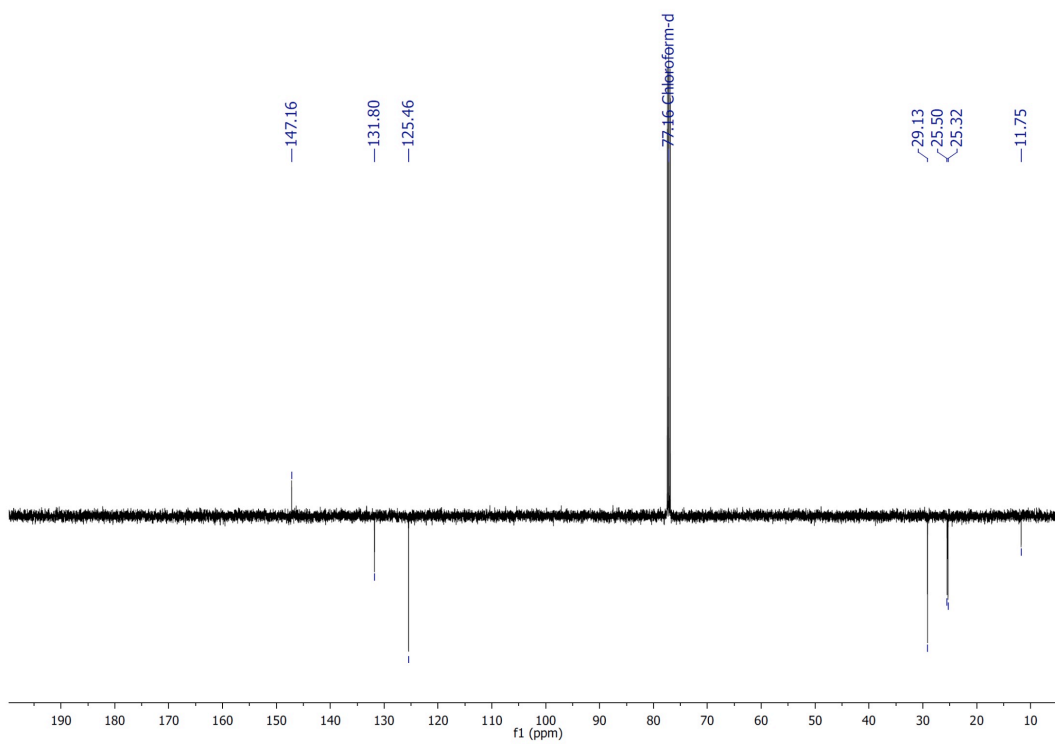

[(Br<sub>2</sub>)·S(IPr<sup>Cl</sup>)]  
<sup>1</sup>H NMR

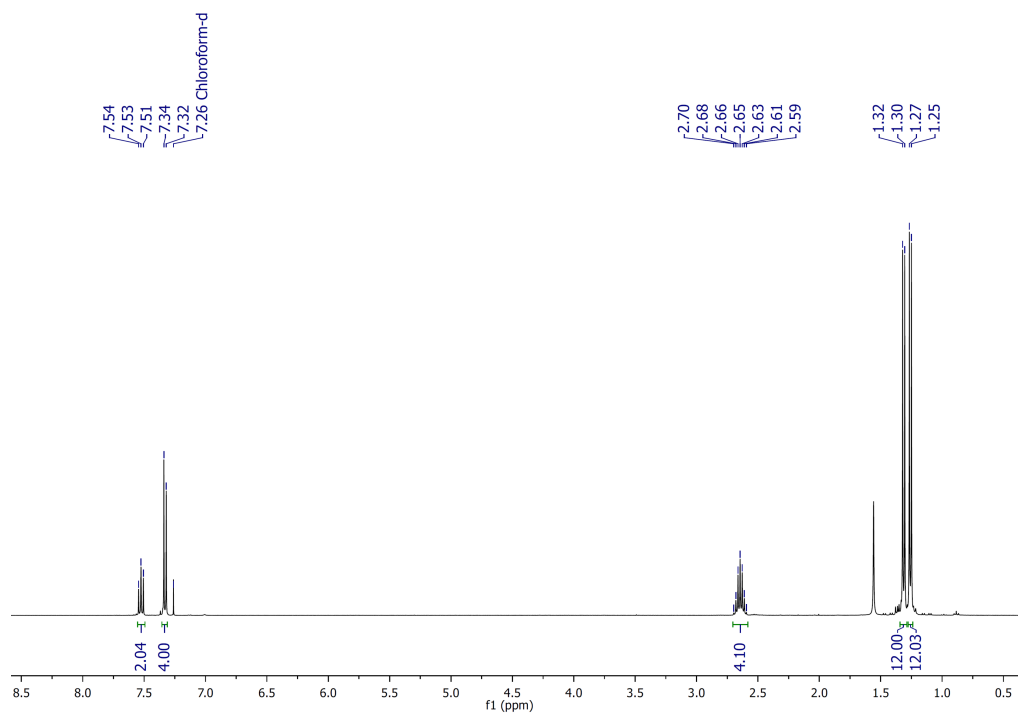

<sup>13</sup>C{<sup>1</sup>H} DEPT Q NMR

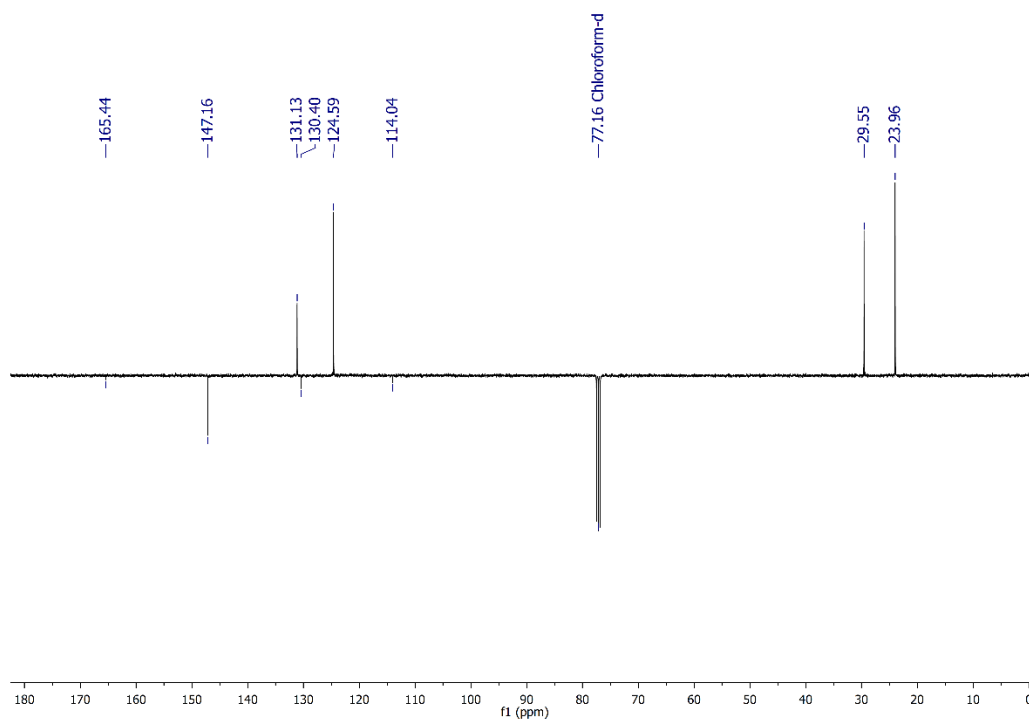

[SBr·(ICy)]Br  
<sup>1</sup>H NMR

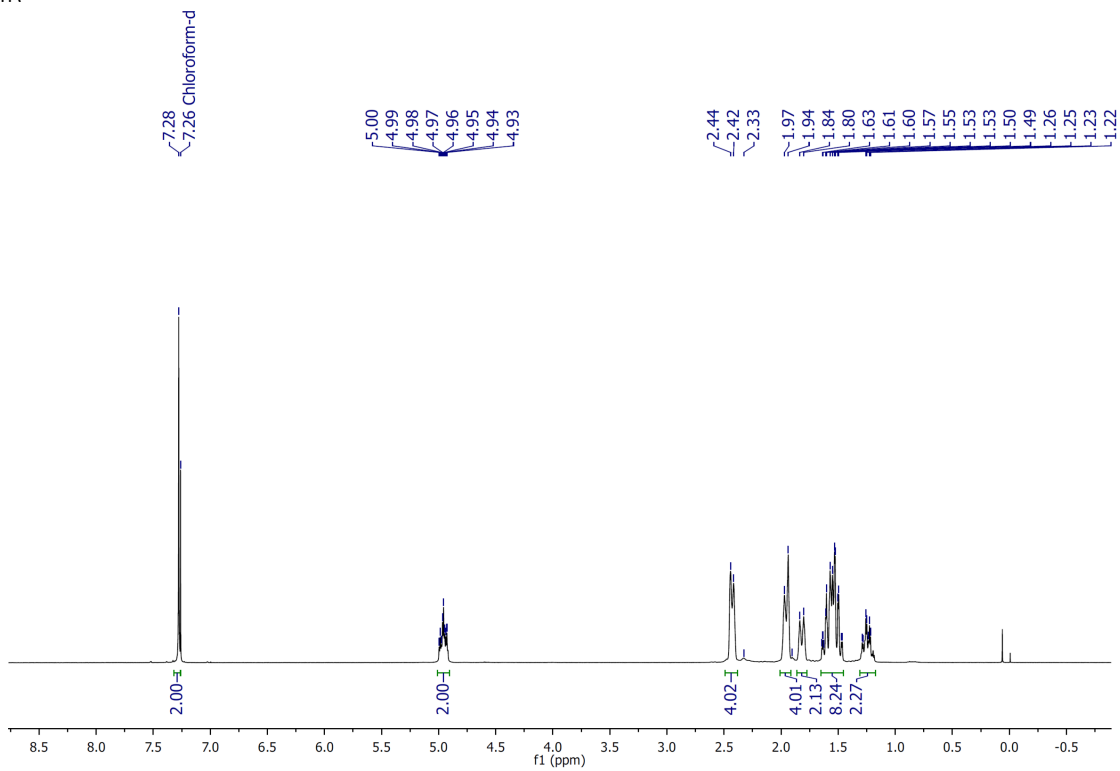

<sup>13</sup>C{<sup>1</sup>H} DEPT Q NMR

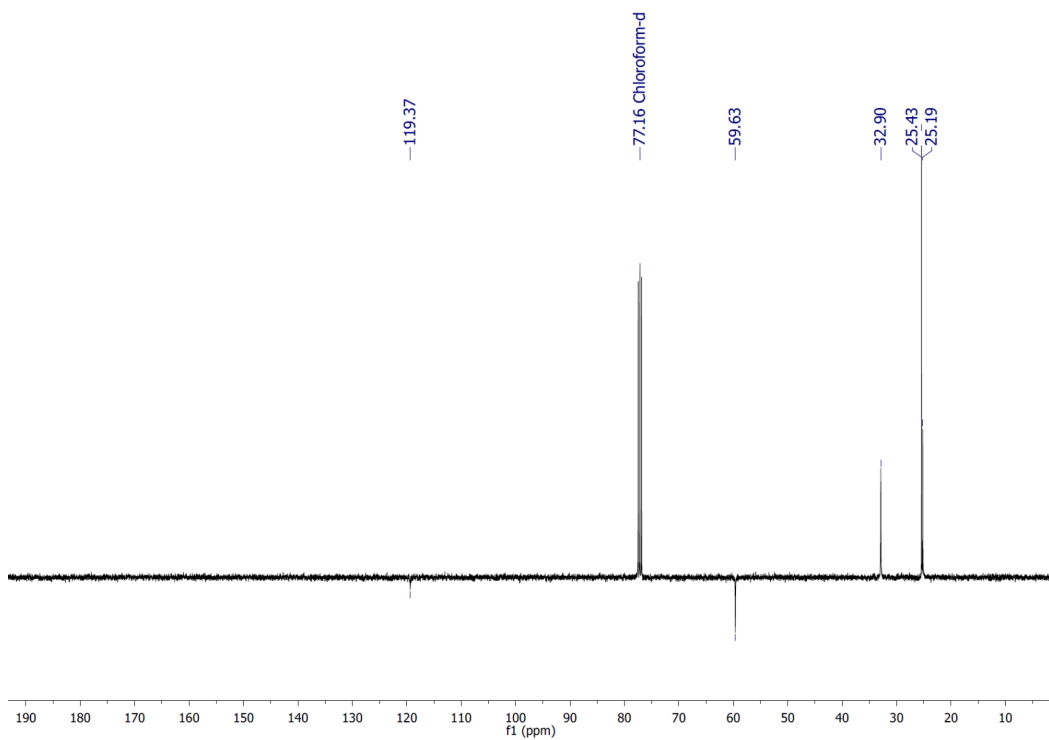

[SeCl<sub>2</sub>(IPr)]  
<sup>1</sup>H NMR

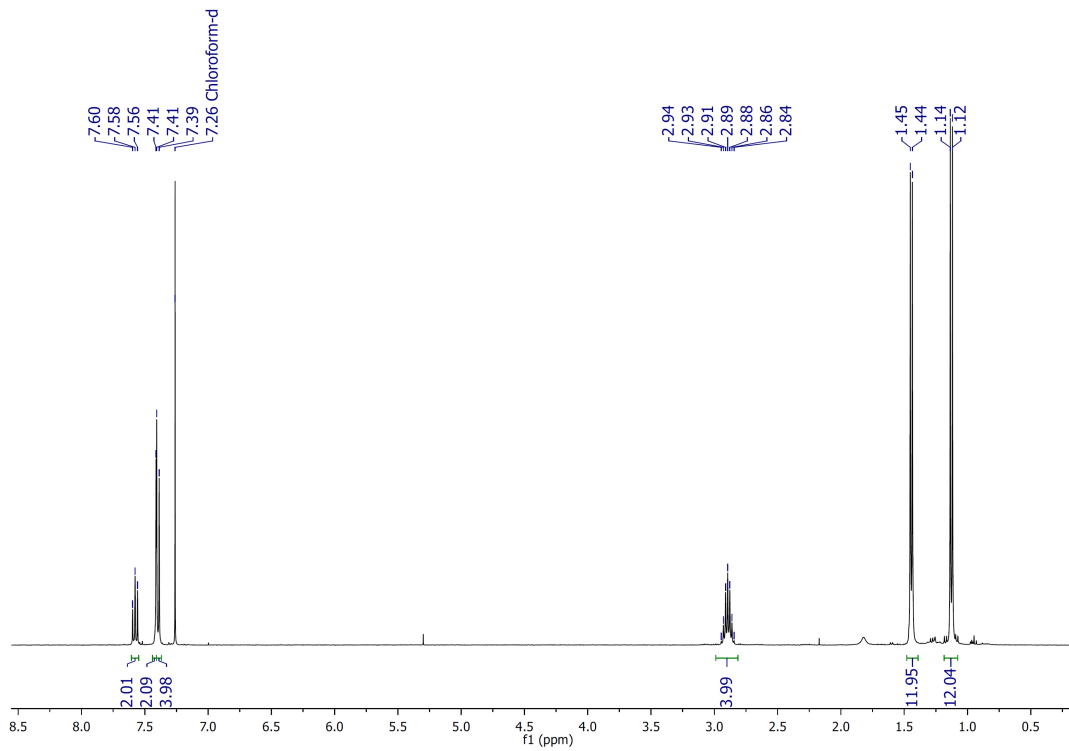

<sup>13</sup>C{<sup>1</sup>H} DEPT Q NMR

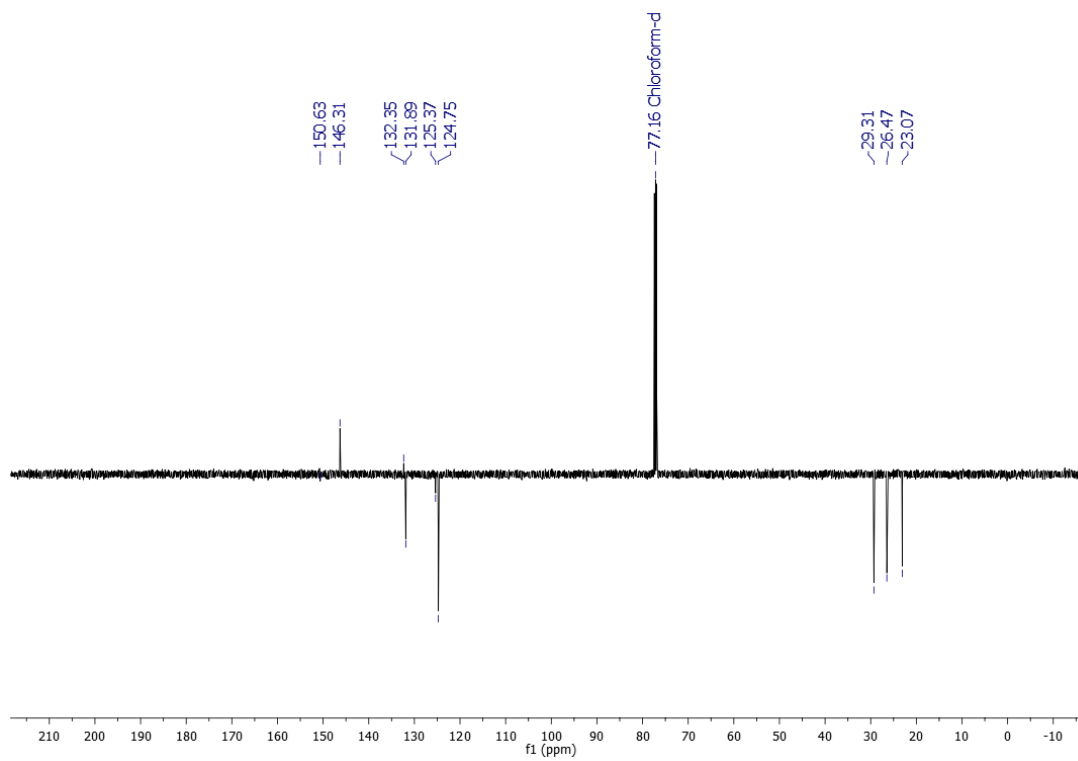



$^{77}\text{Se}$  NMR

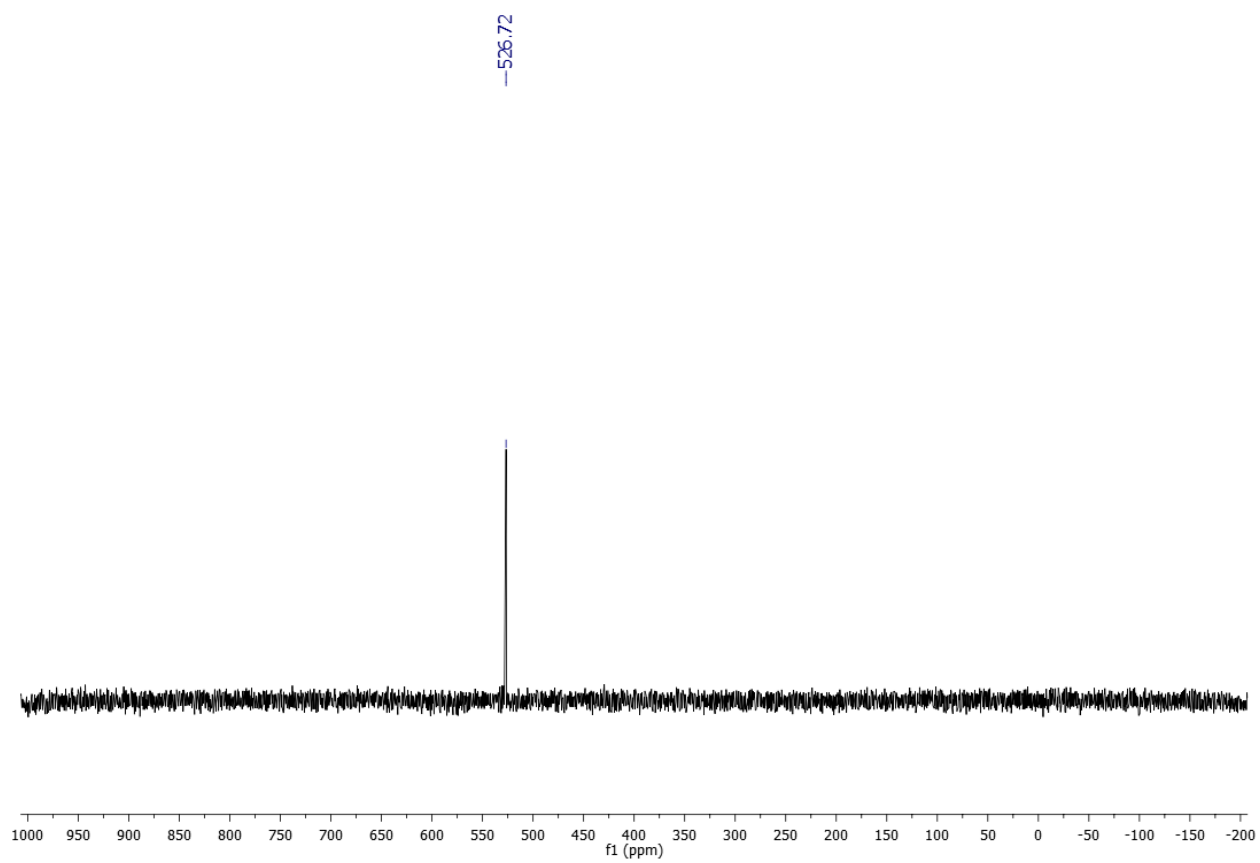

[SeCl<sub>2</sub>(SIPr)]  
<sup>1</sup>H NMR

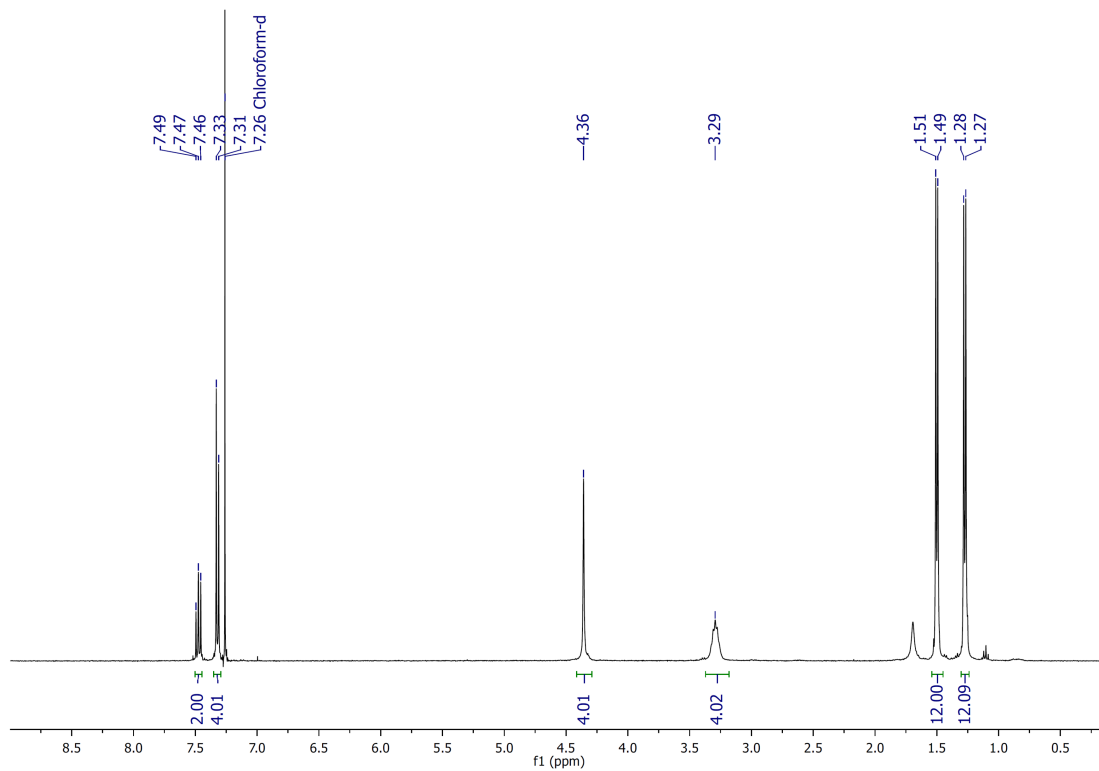

<sup>13</sup>C{<sup>1</sup>H} DEPT Q NMR

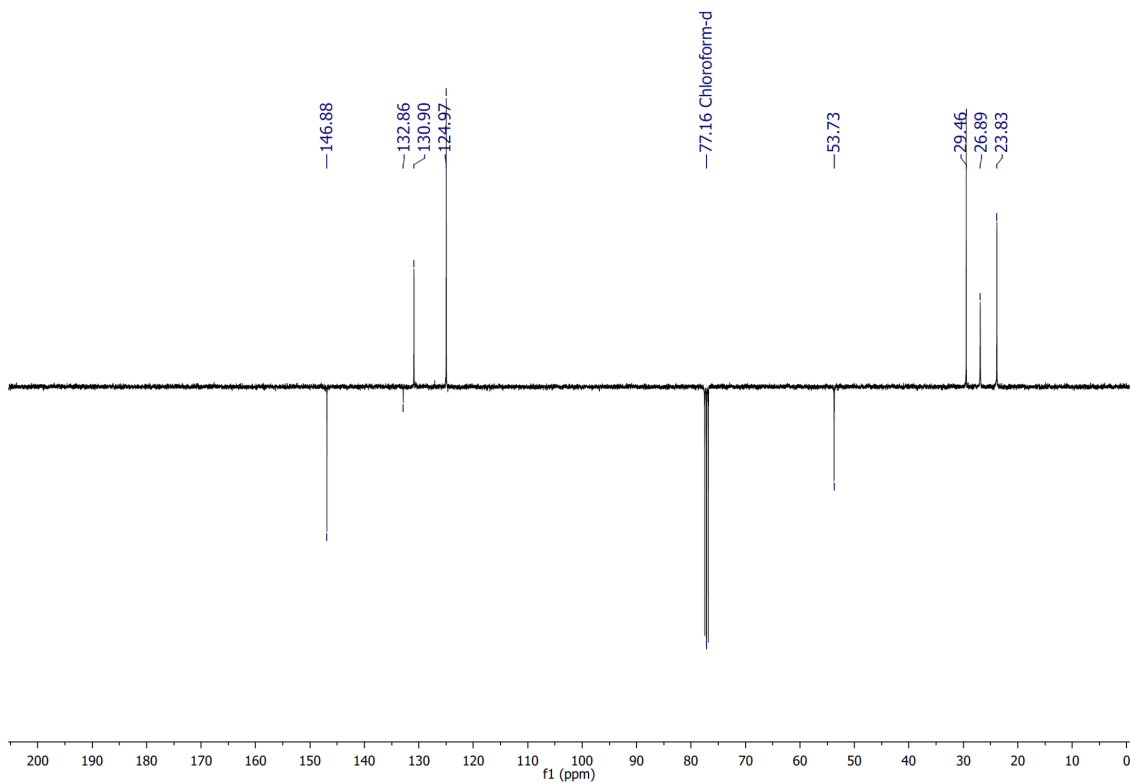

$^{77}\text{Se}$  NMR

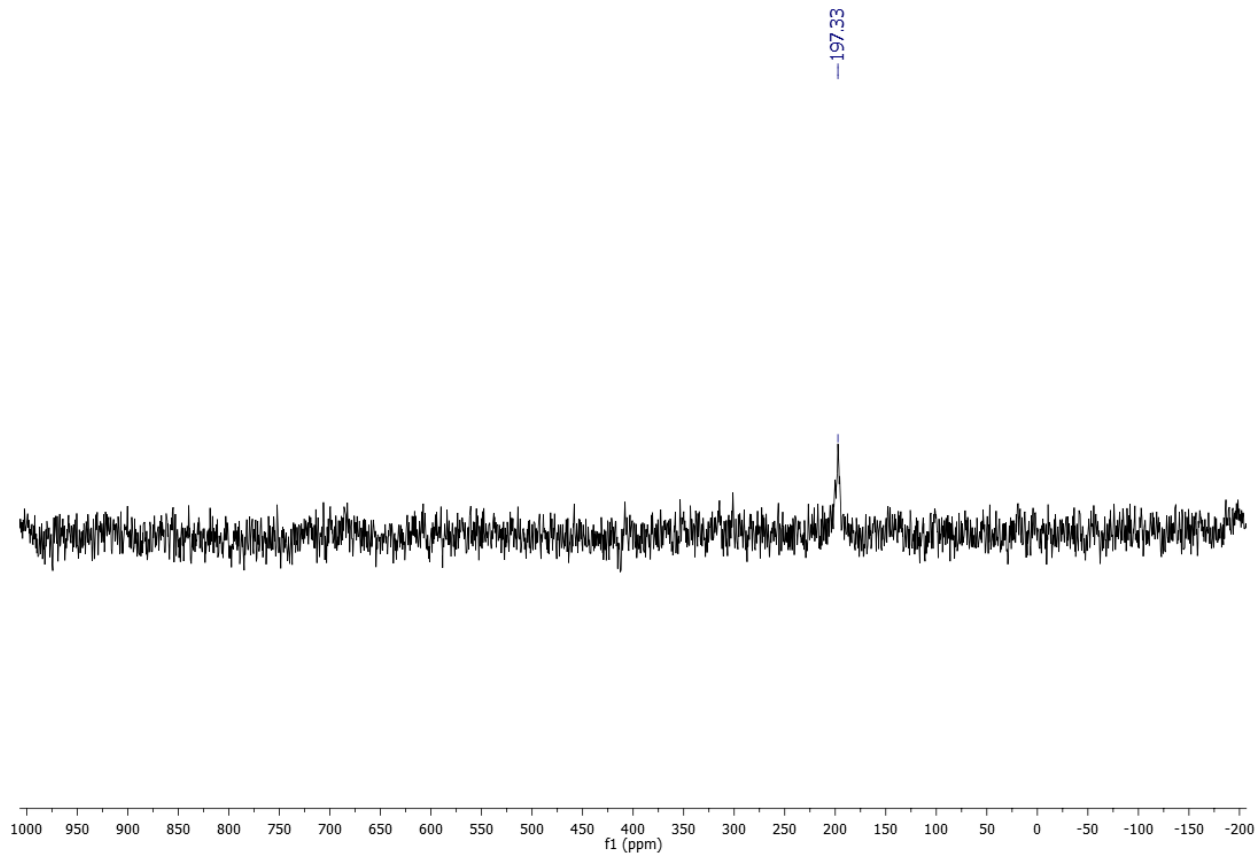

[SeCl<sub>2</sub>(IMes)]  
<sup>1</sup>H NMR

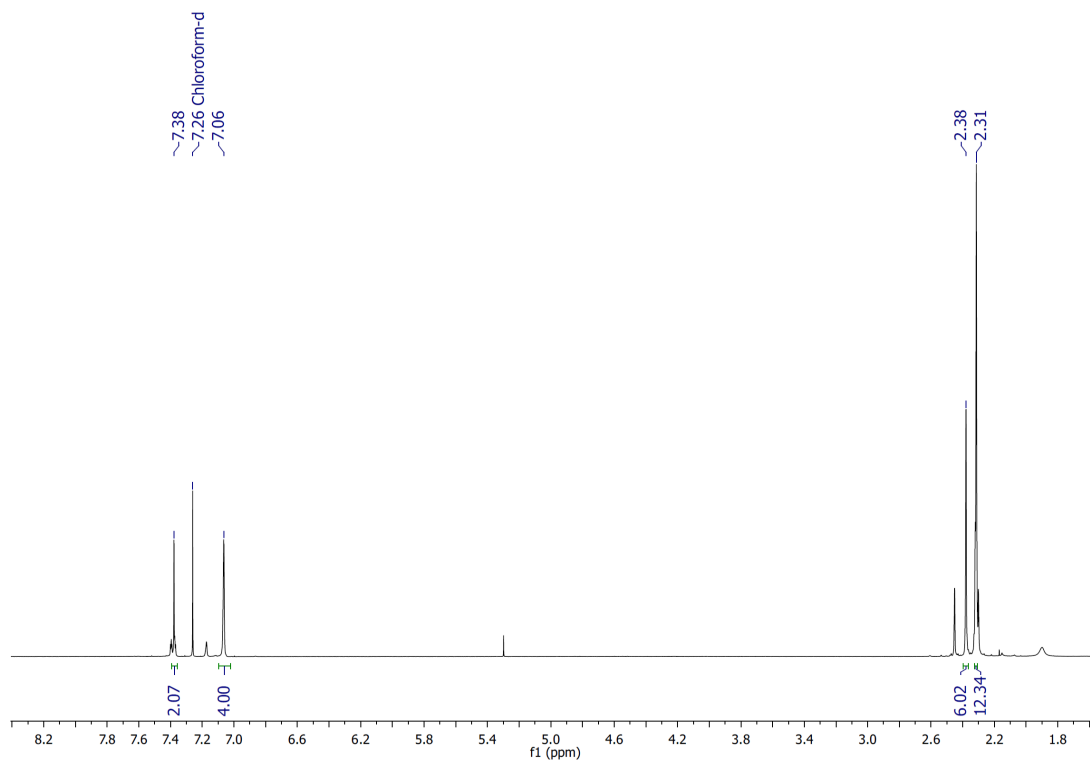

<sup>13</sup>C{<sup>1</sup>H} DEPT Q NMR

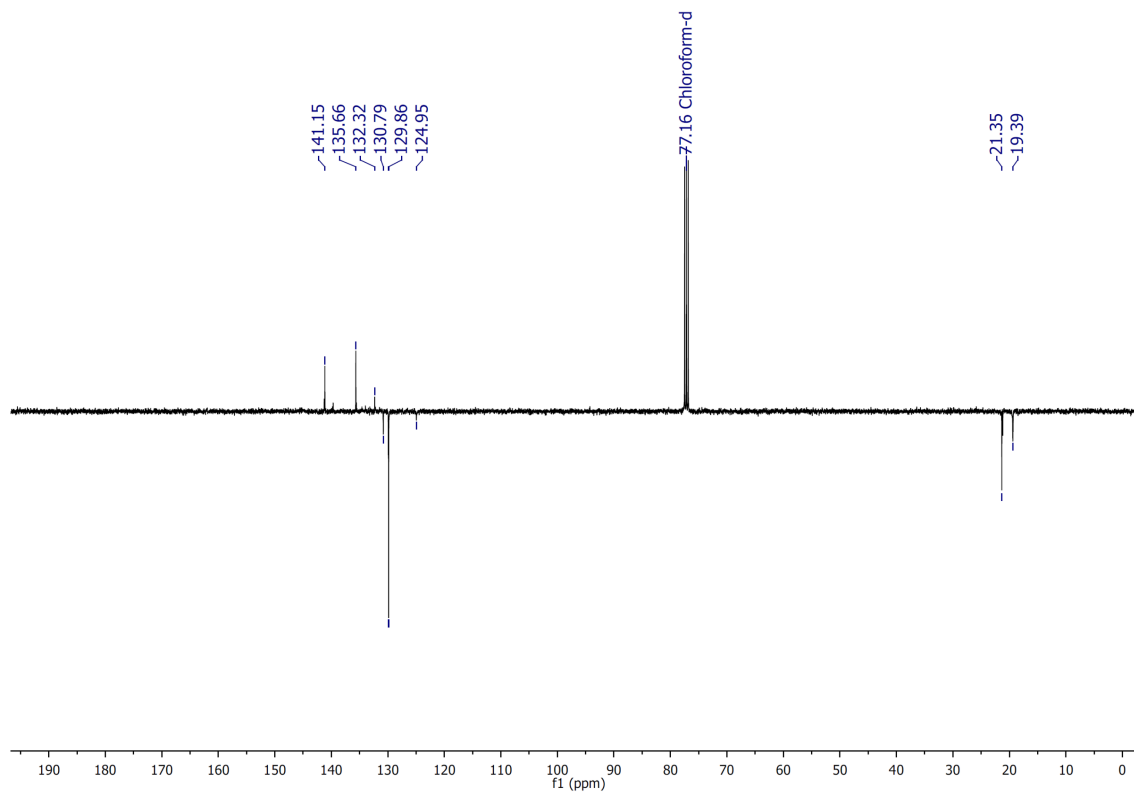

$^{77}\text{Se}$  NMR

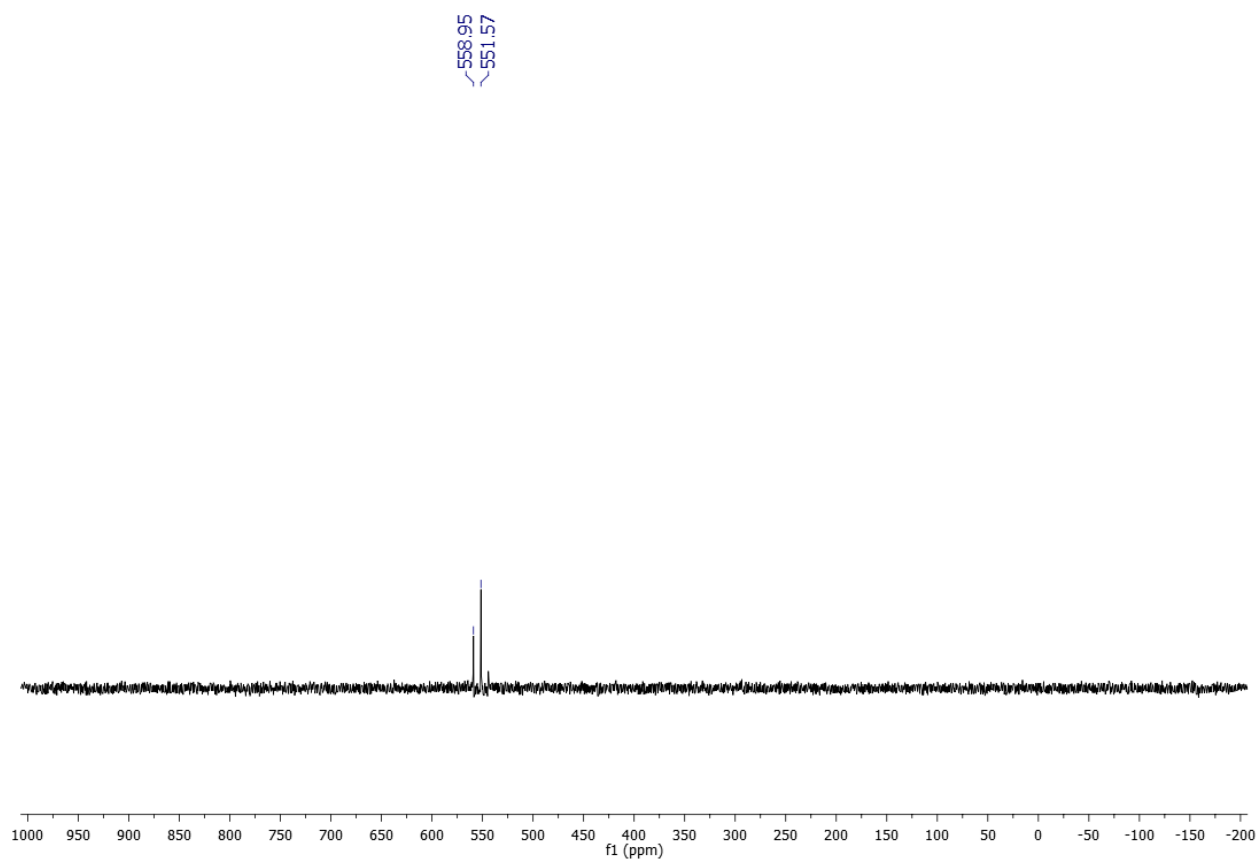

[SeCl<sub>2</sub>(SImes)]  
<sup>1</sup>H NMR

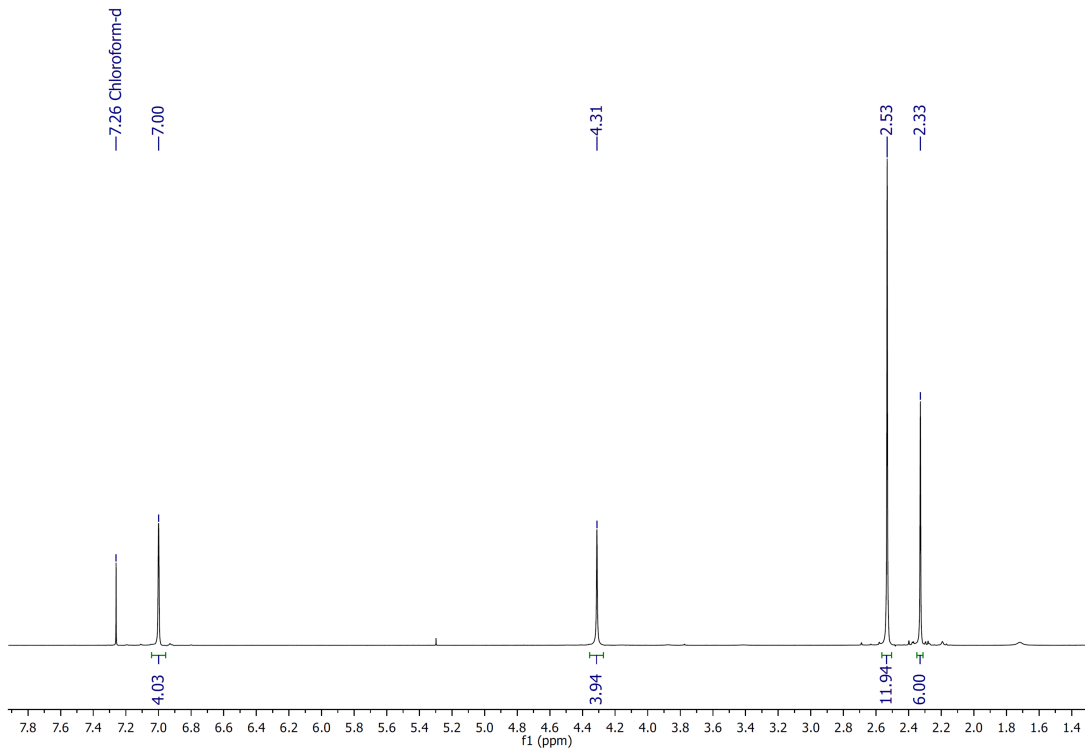

<sup>13</sup>C{<sup>1</sup>H} DEPT Q NMR

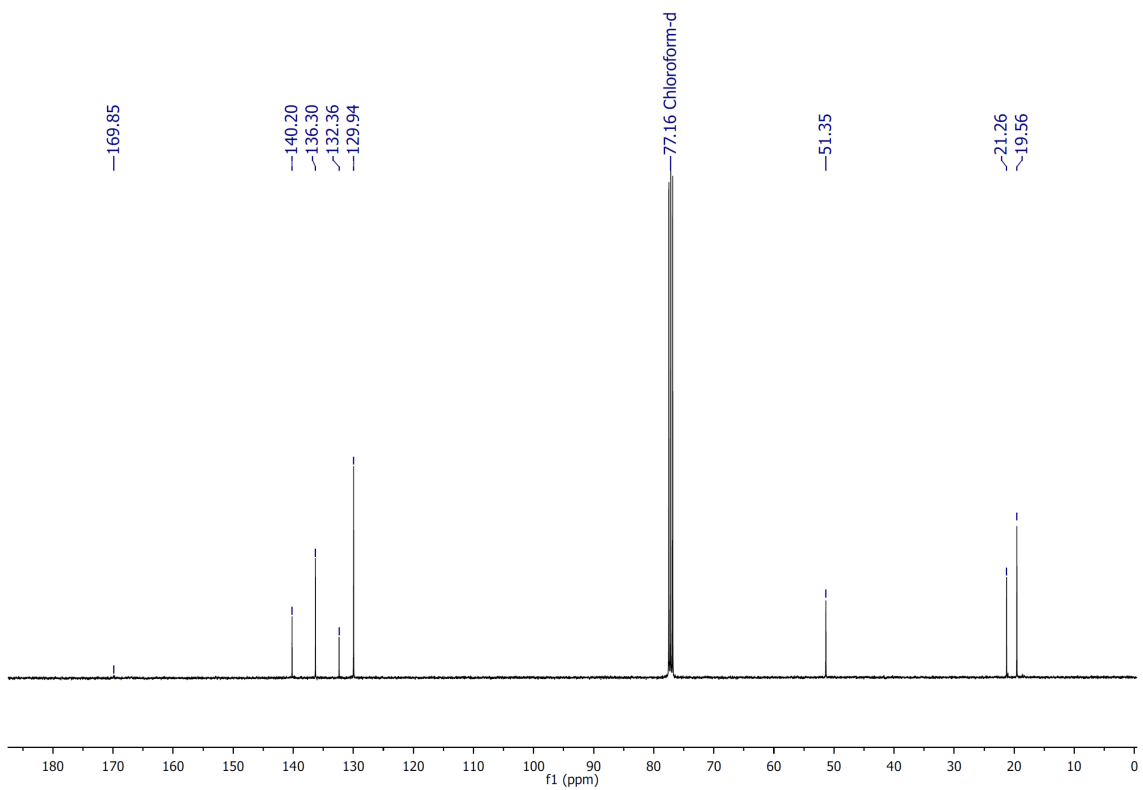

$^{77}\text{Se}$  NMR

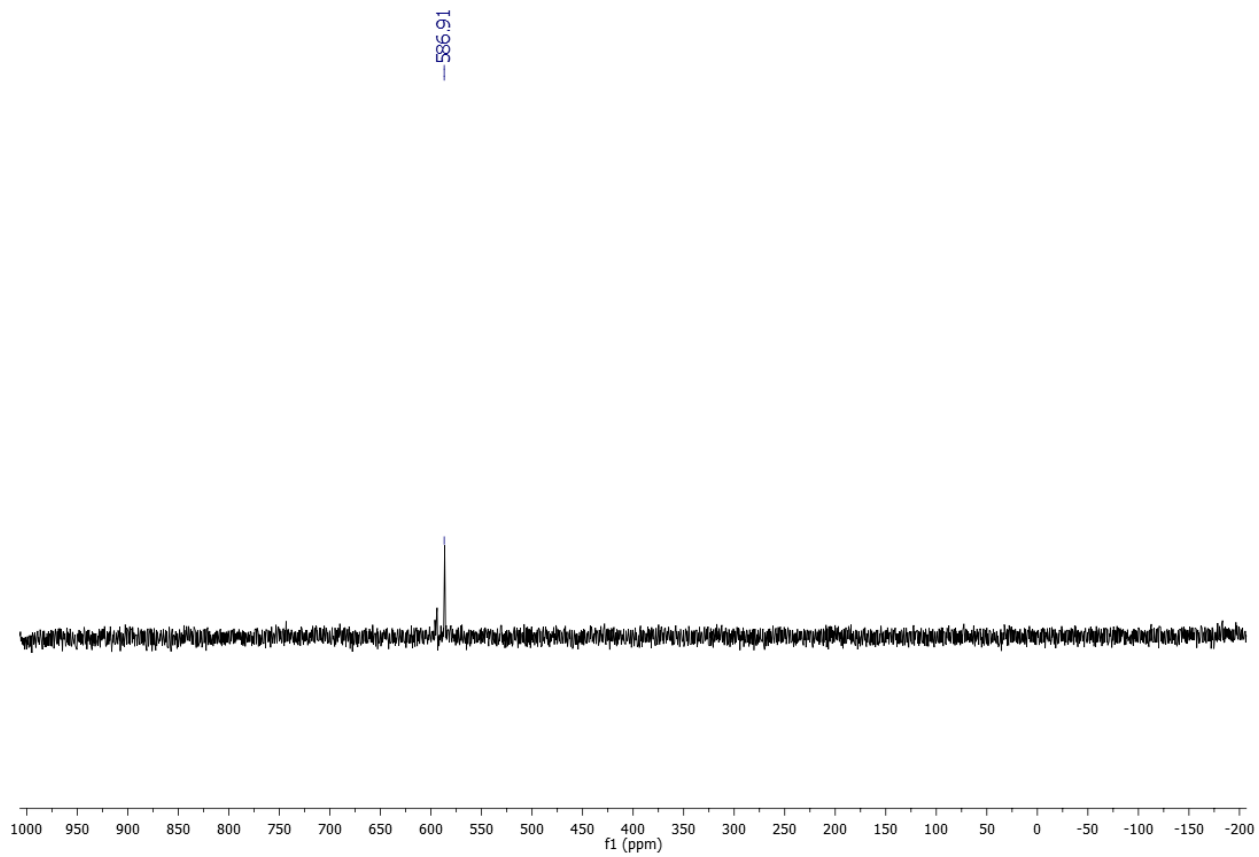

[SeCl<sub>2</sub>(IPr<sup>Me</sup>)]  
<sup>1</sup>H NMR

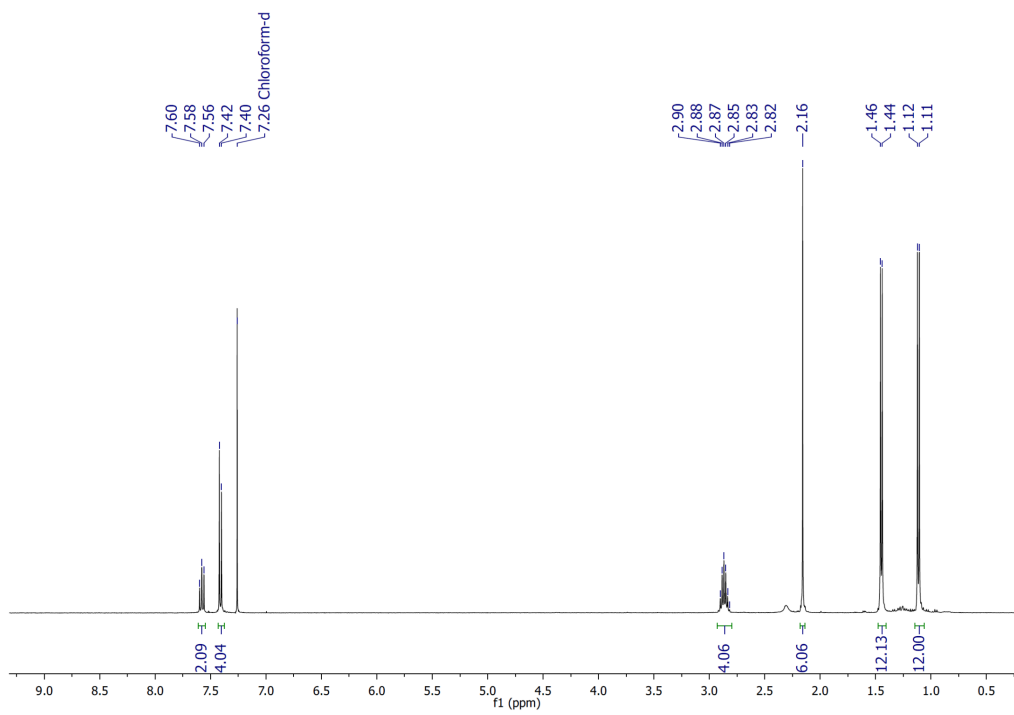

<sup>13</sup>C{<sup>1</sup>H} DEPT Q NMR

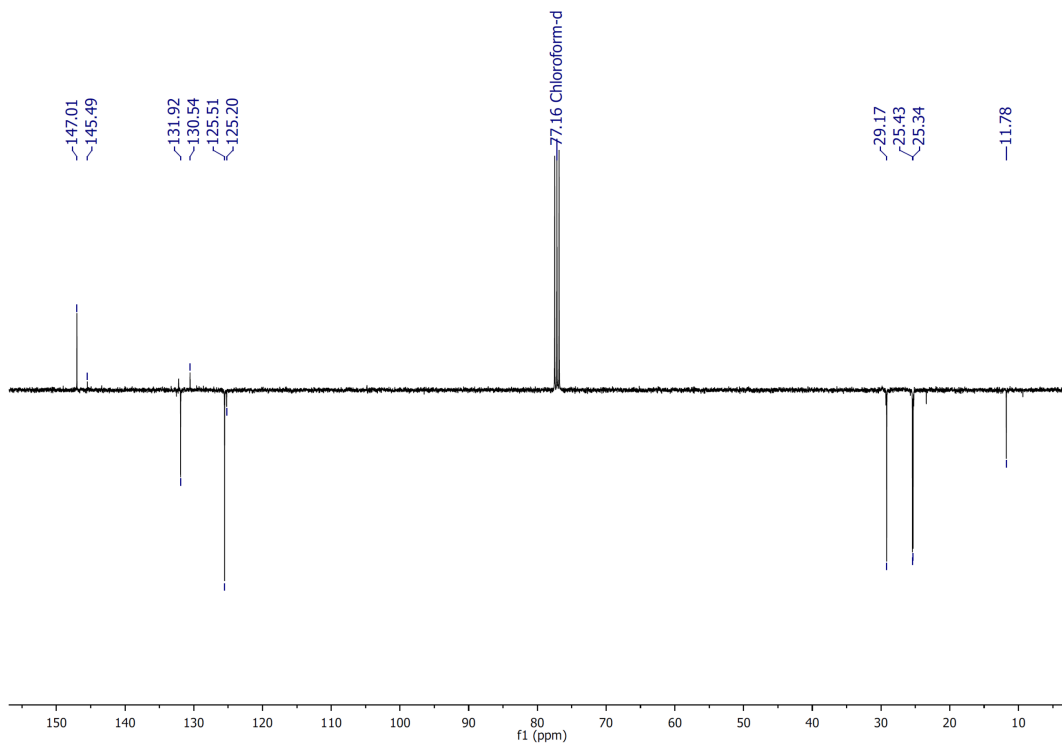



$^{77}\text{Se}$  NMR

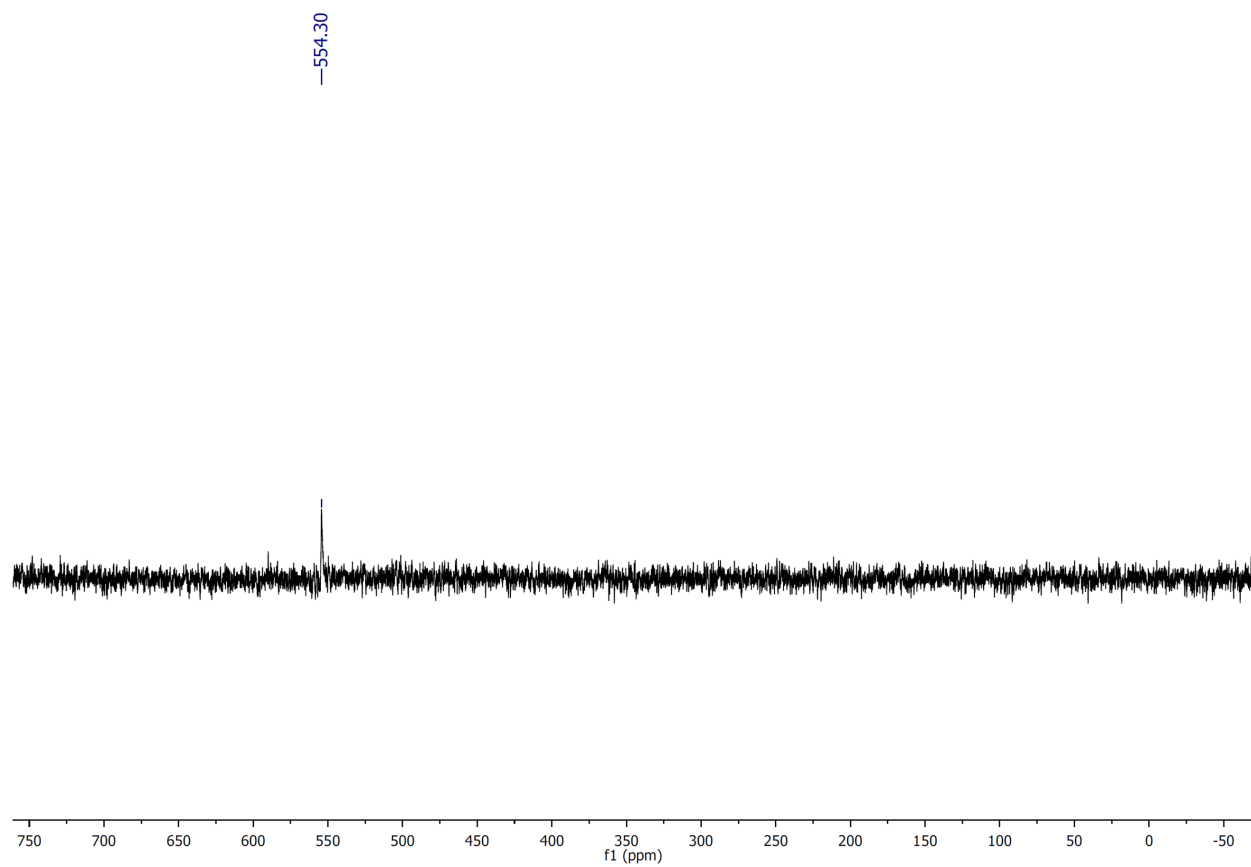

[SeCl<sub>2</sub>(IPr<sup>Cl</sup>)]  
<sup>1</sup>H NMR

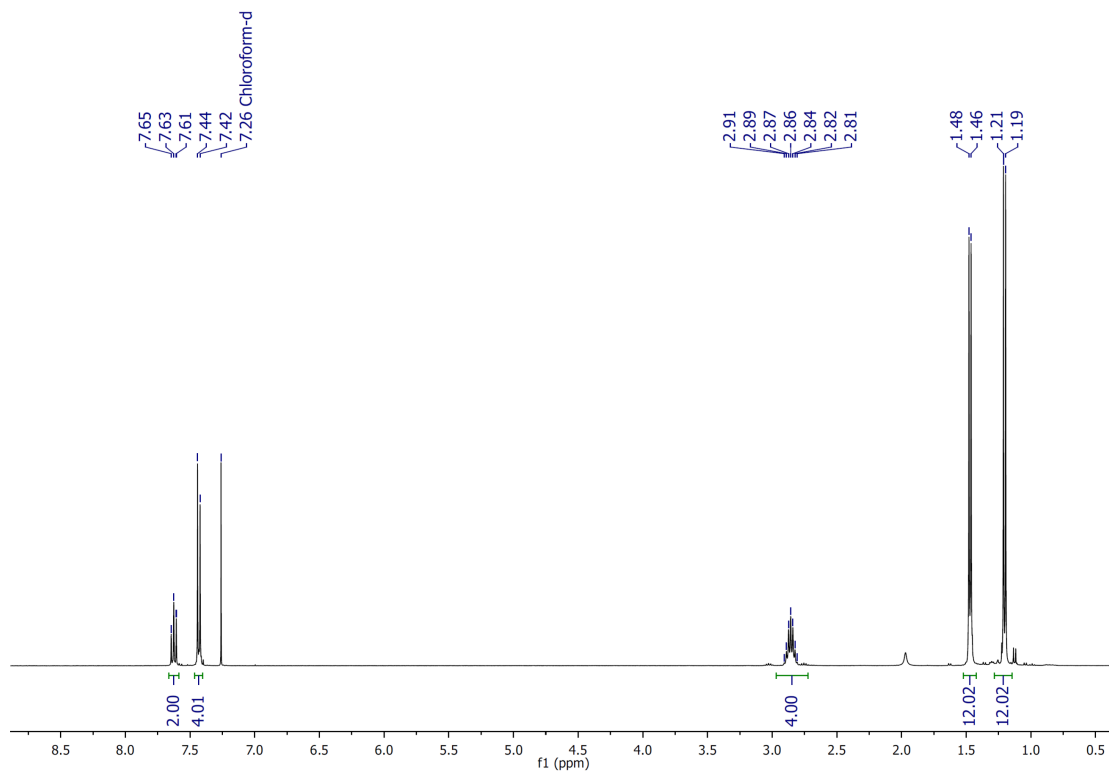

<sup>13</sup>C{<sup>1</sup>H} DEPT Q NMR

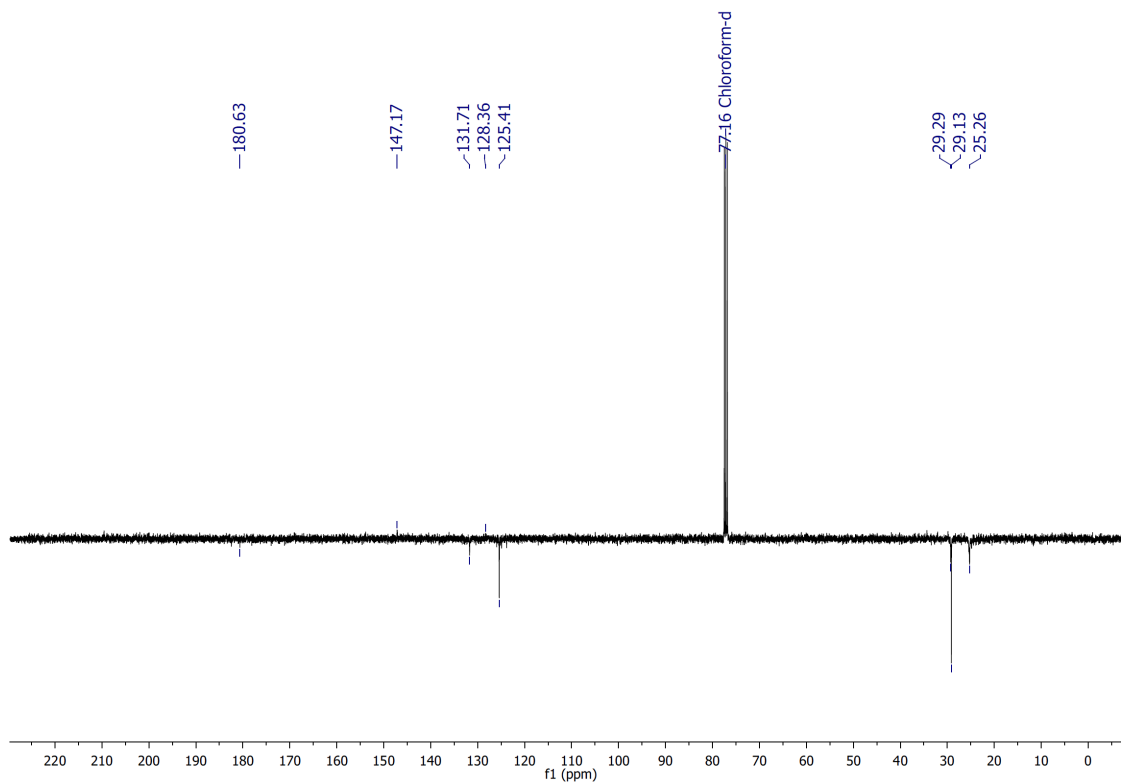

$^{77}\text{Se}$  NMR

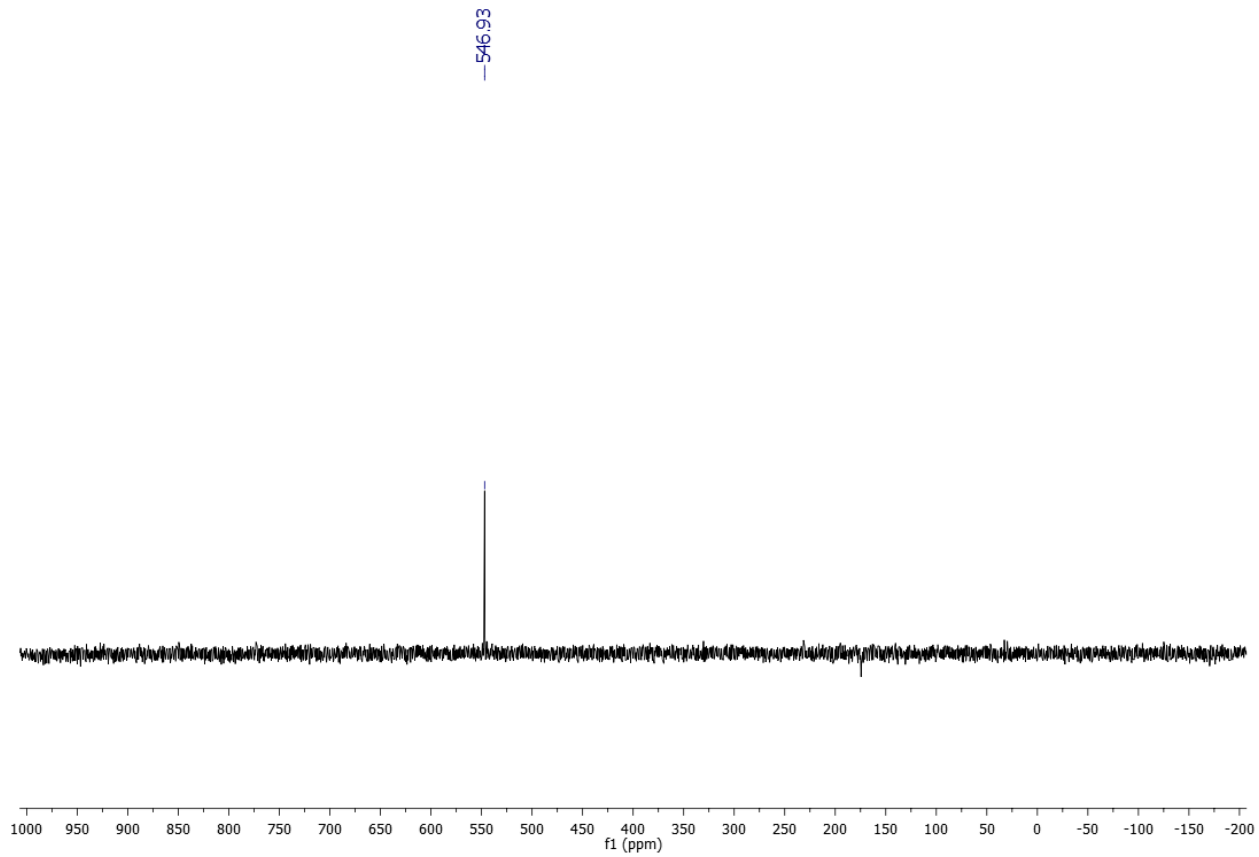

[SeCl<sub>2</sub>(ICy)]  
<sup>1</sup>H NMR

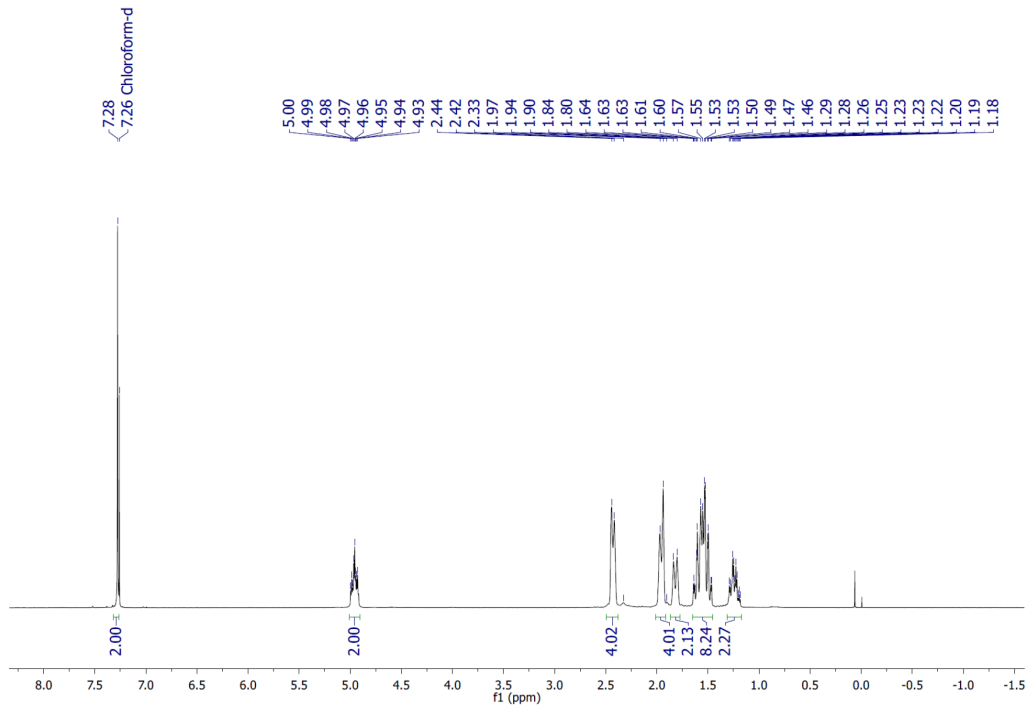

<sup>13</sup>C{<sup>1</sup>H} DEPT Q NMR

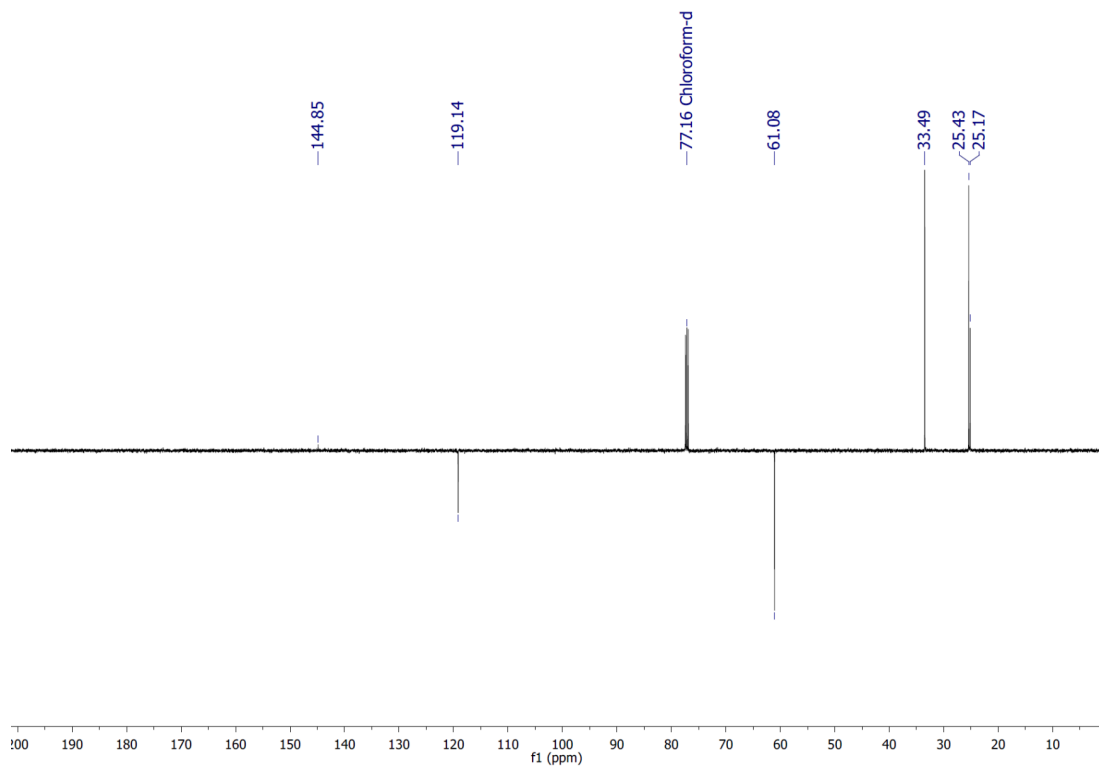

$^{77}\text{Se}$  NMR

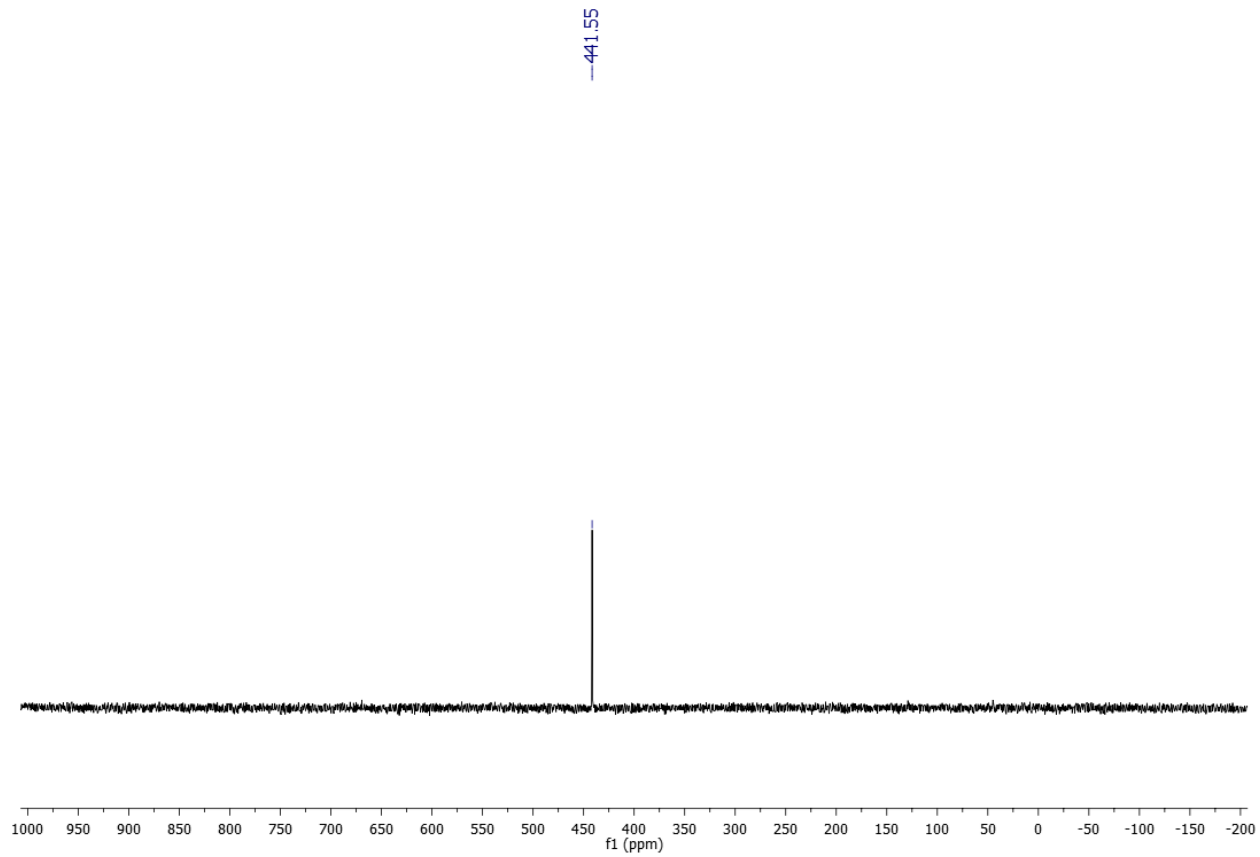

[SeCl<sub>2</sub>(IPr\*)]  
<sup>1</sup>H NMR

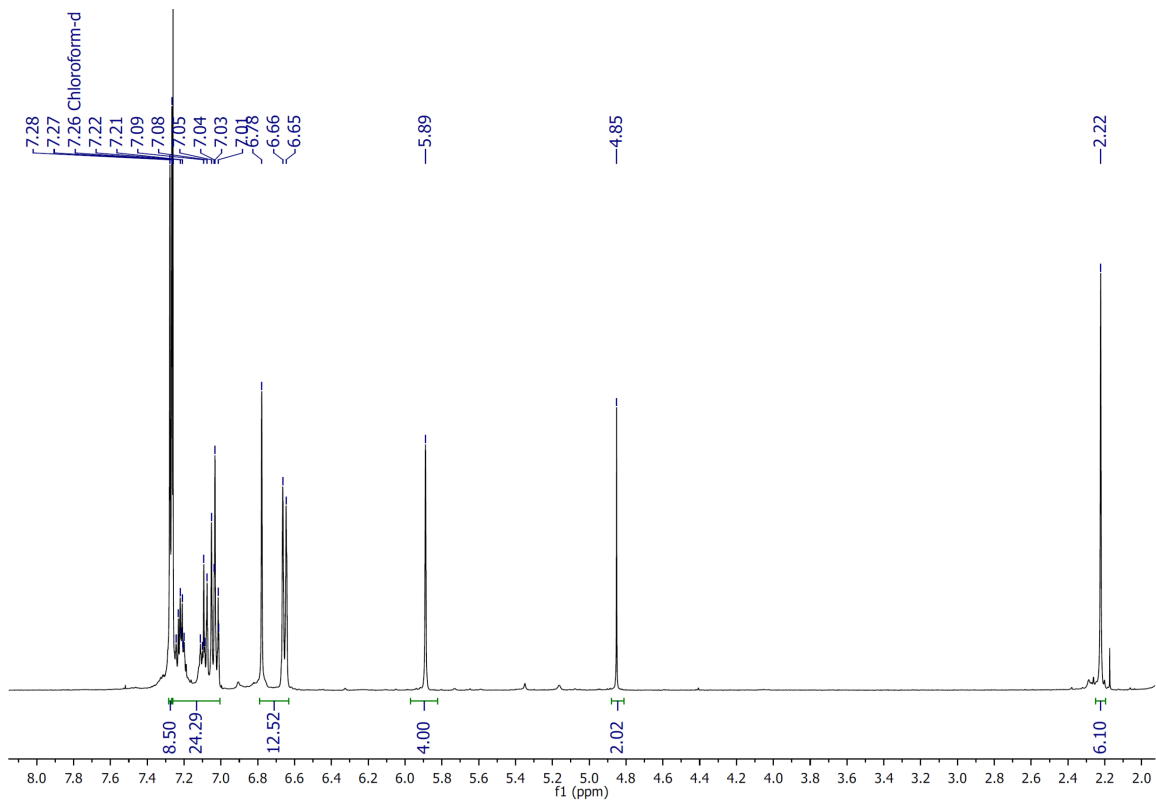

<sup>13</sup>C{<sup>1</sup>H} DEPT Q NMR

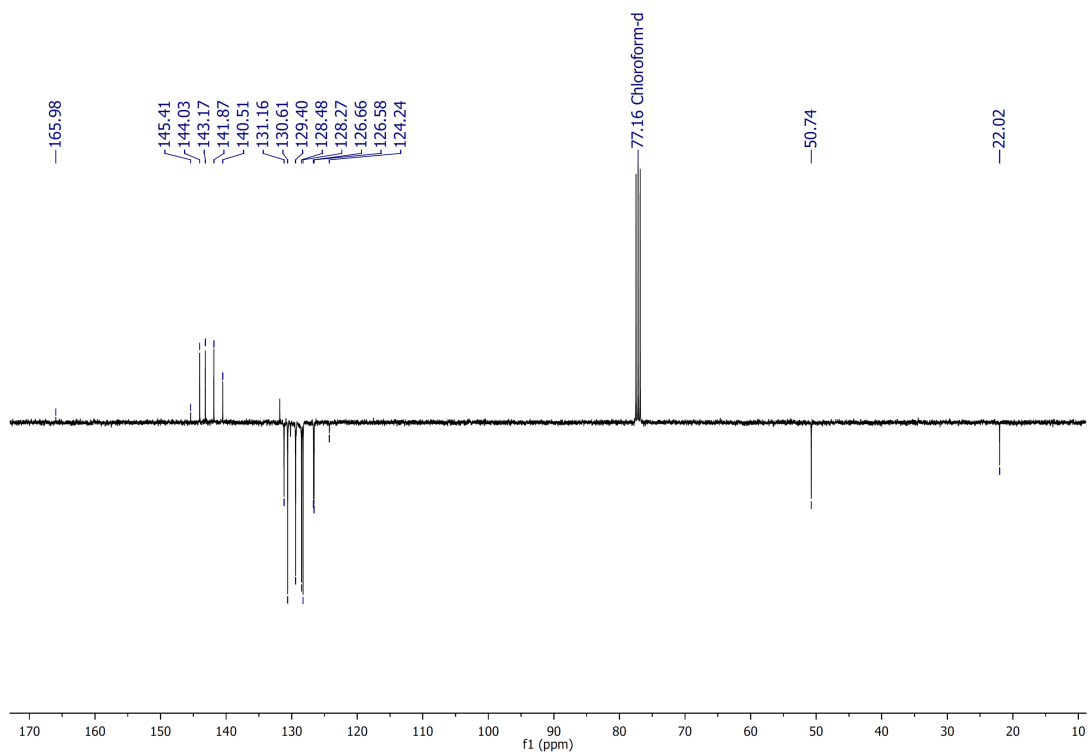

$^{77}\text{Se}$  NMR

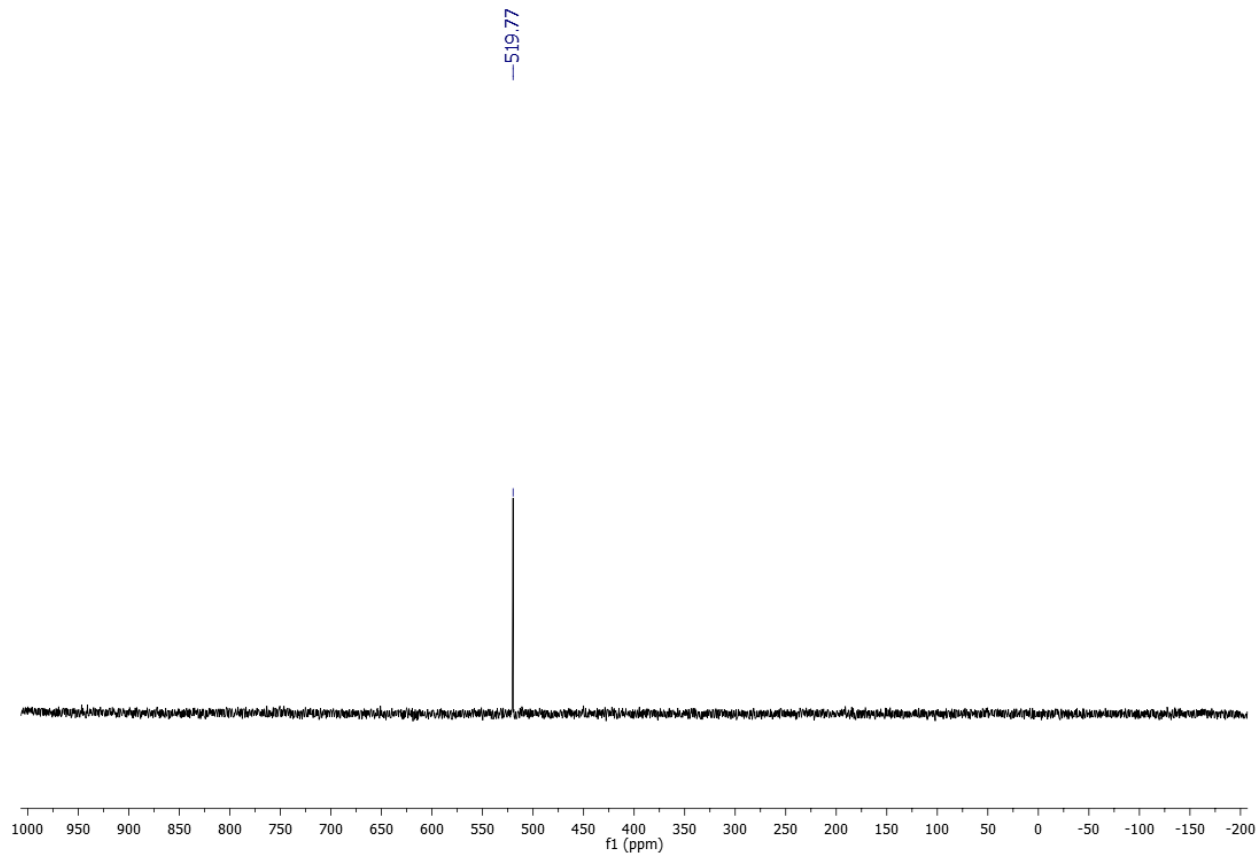

# Reaction of [S(SiMes)] with SO<sub>2</sub>Cl<sub>2</sub>

<sup>1</sup>H NMR

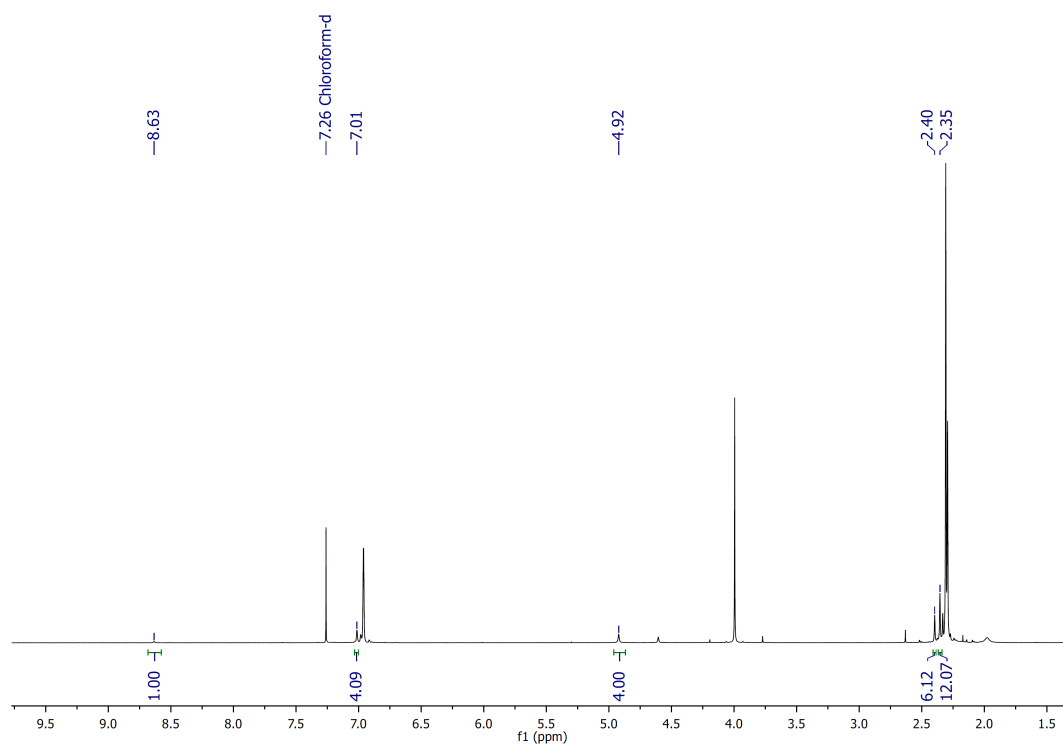



[(I<sub>2</sub>)-Se(IPr)]  
<sup>1</sup>H NMR

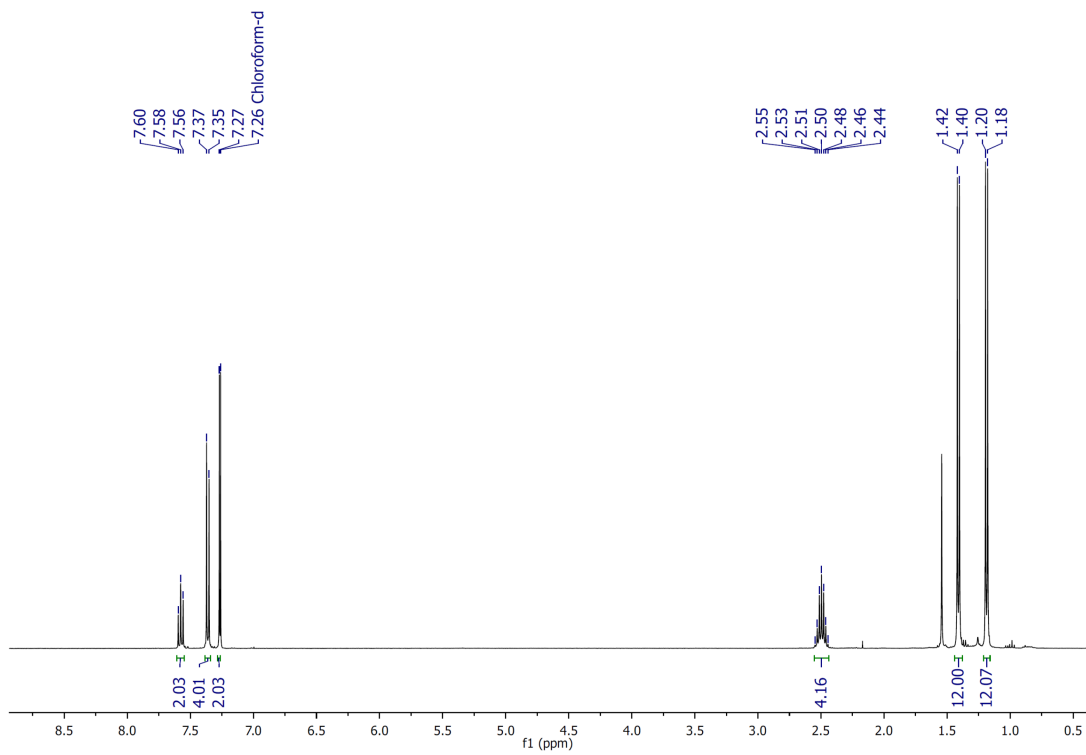

<sup>13</sup>C{<sup>1</sup>H} DEPT Q NMR

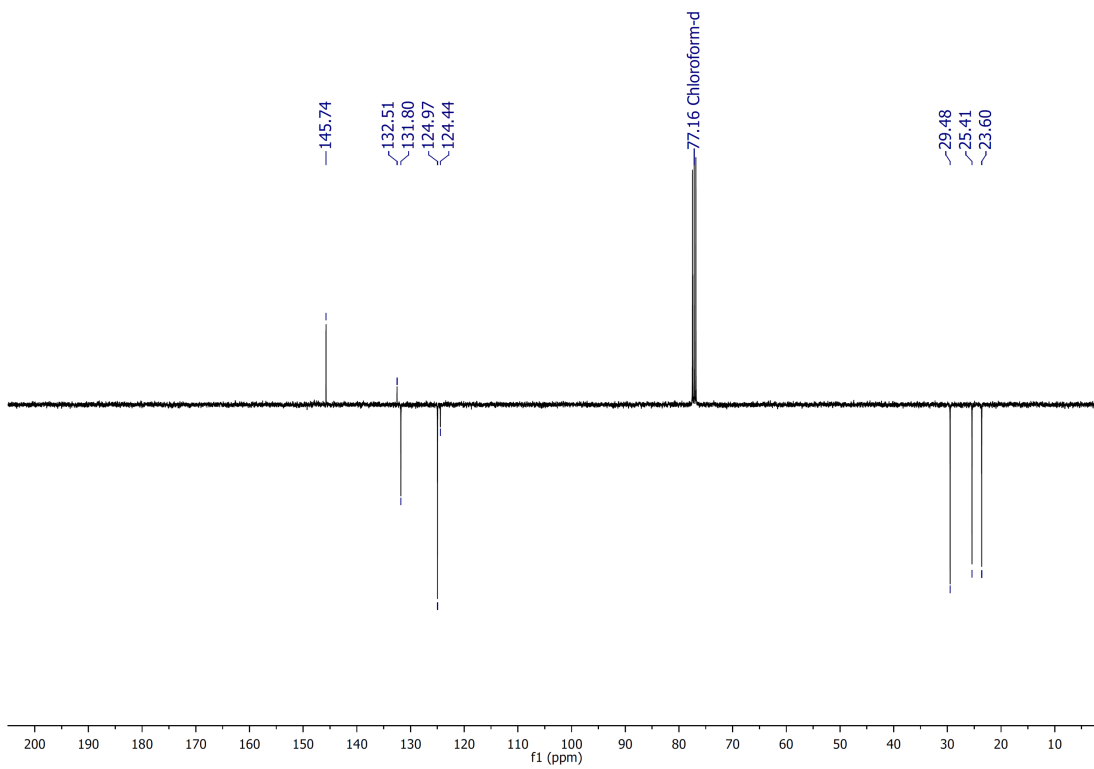

$^{77}\text{Se}$  NMR

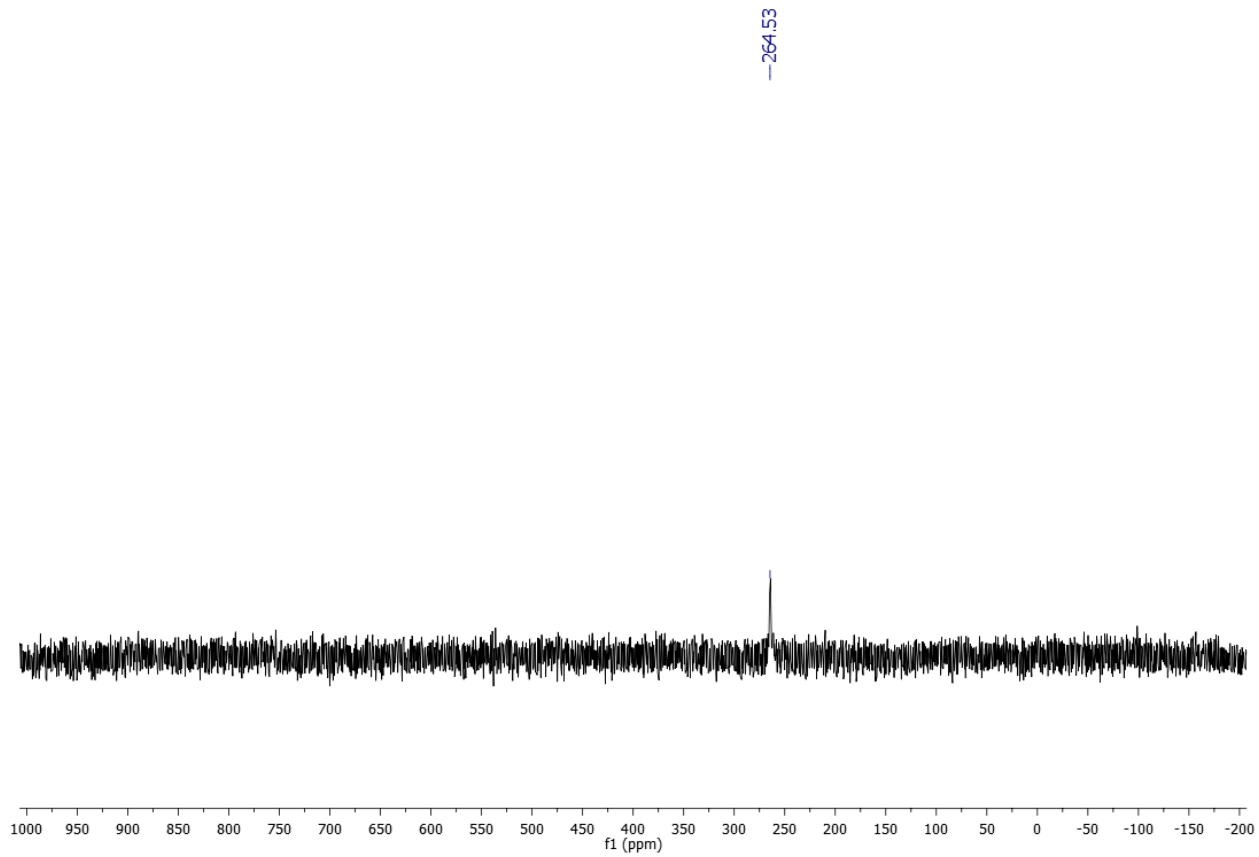

$[\{\text{Se}(\text{SIPr})_2(\mu\text{-I})\}]_5$   
 $^1\text{H}$  NMR

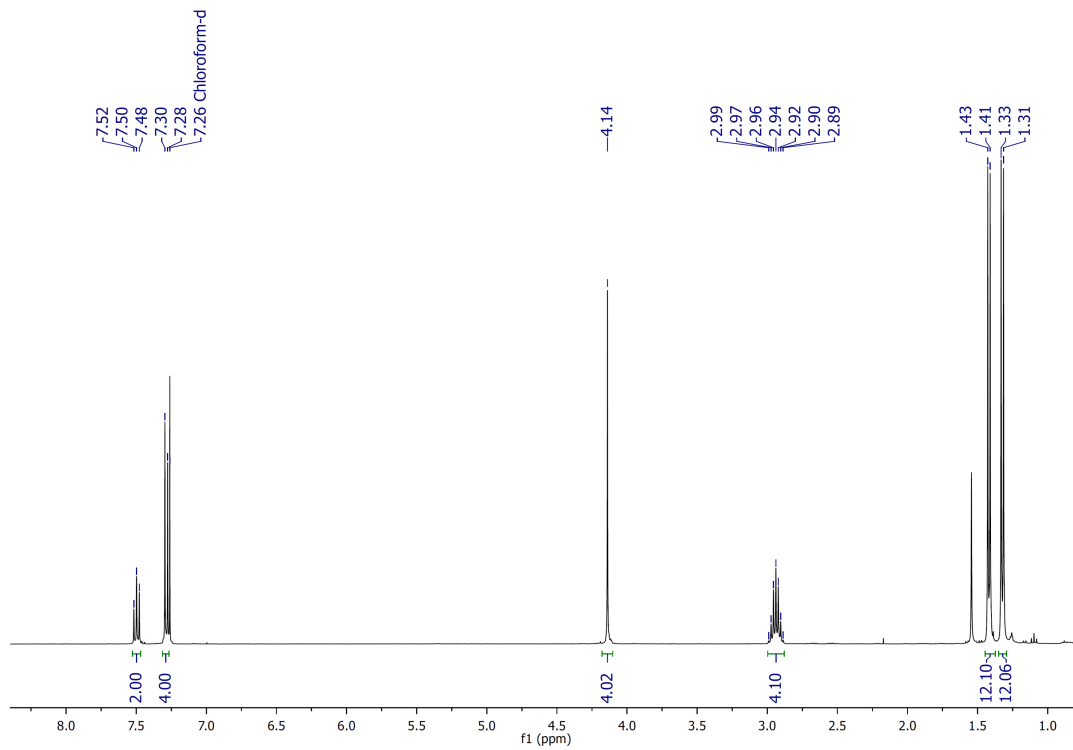

$^{13}\text{C}\{^1\text{H}\}$  DEPT Q NMR

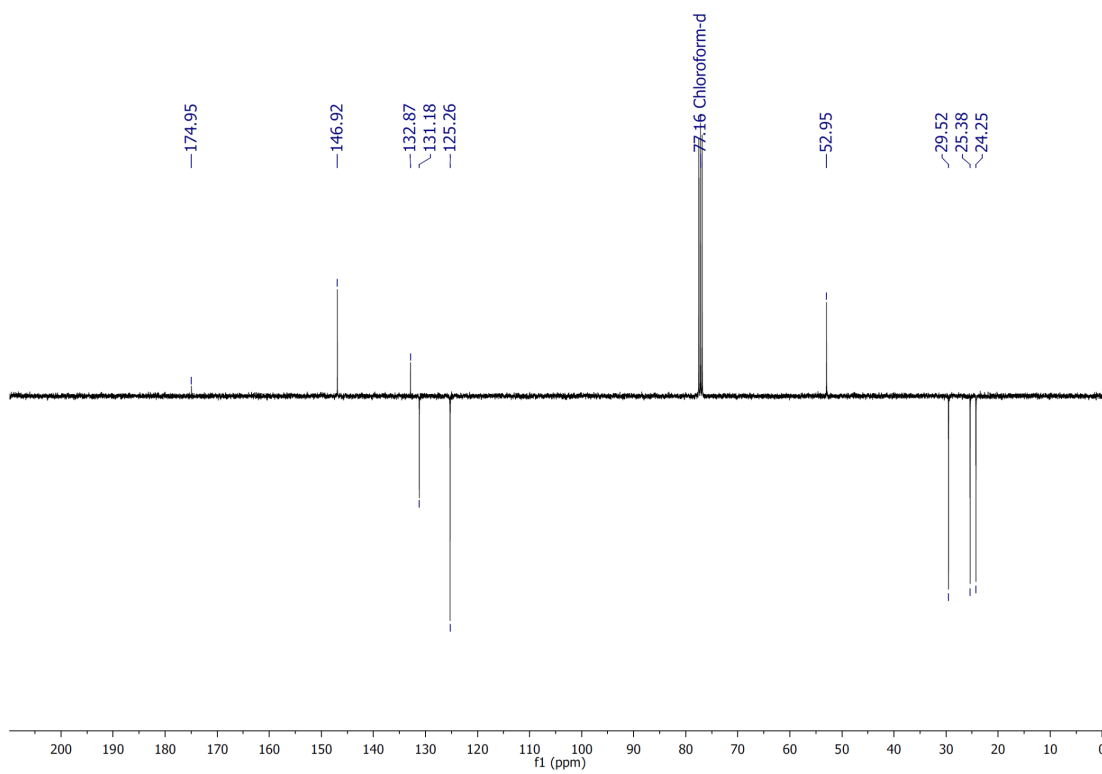

$^{77}\text{Se}$  NMR

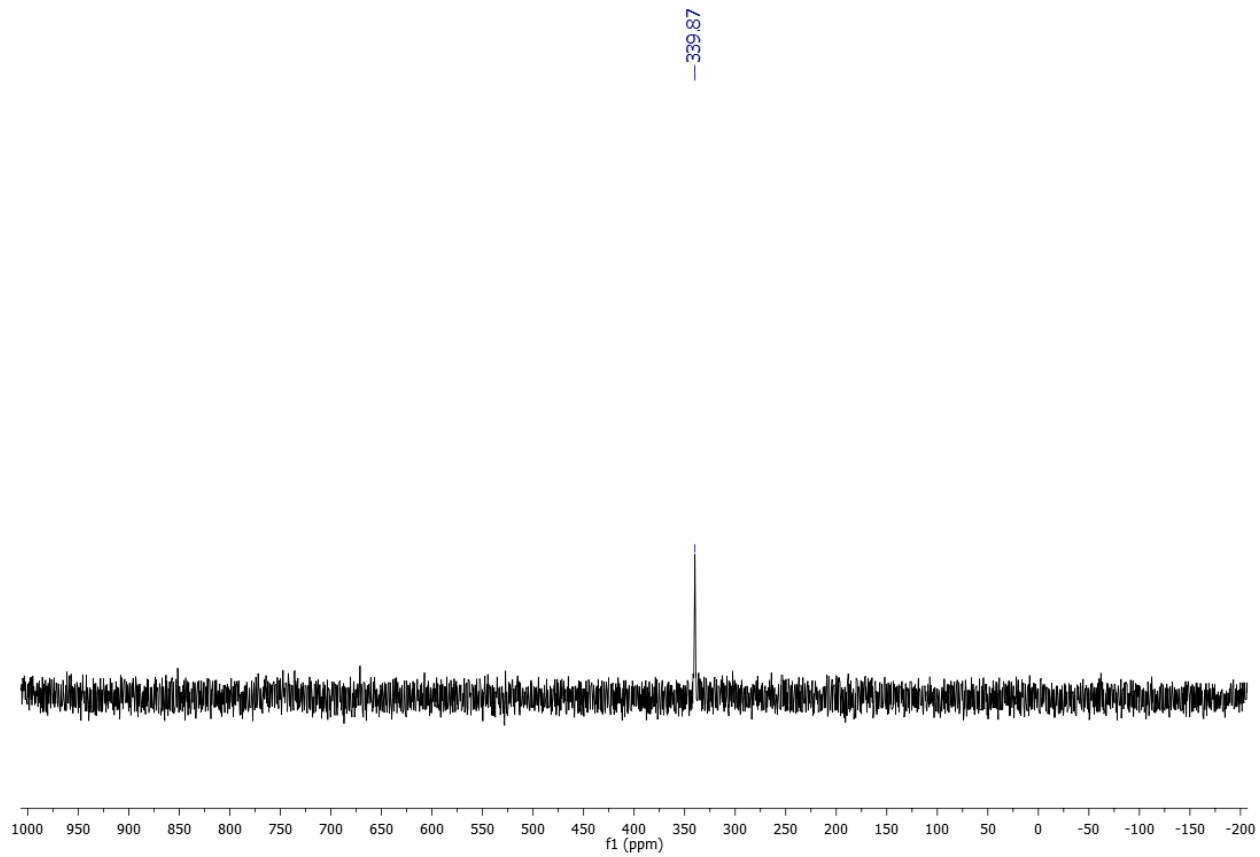

**[(I<sub>2</sub>)-Se(IMes)]**  
<sup>1</sup>H NMR

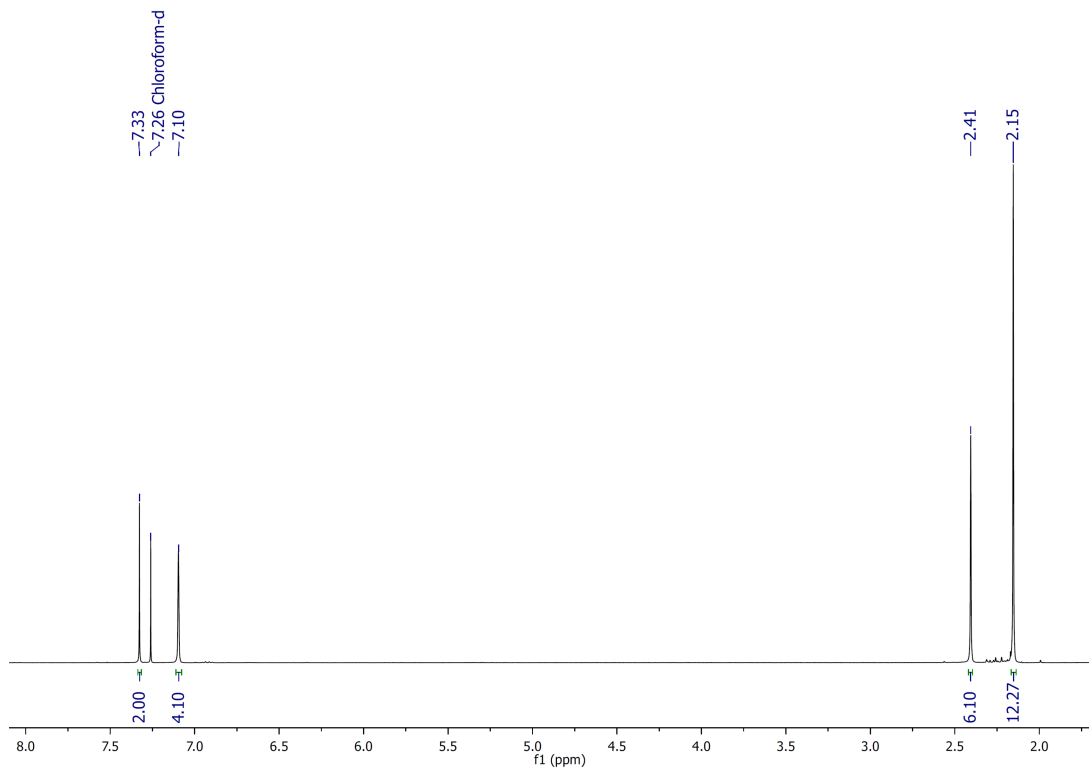

<sup>13</sup>C{<sup>1</sup>H} DEPT Q NMR

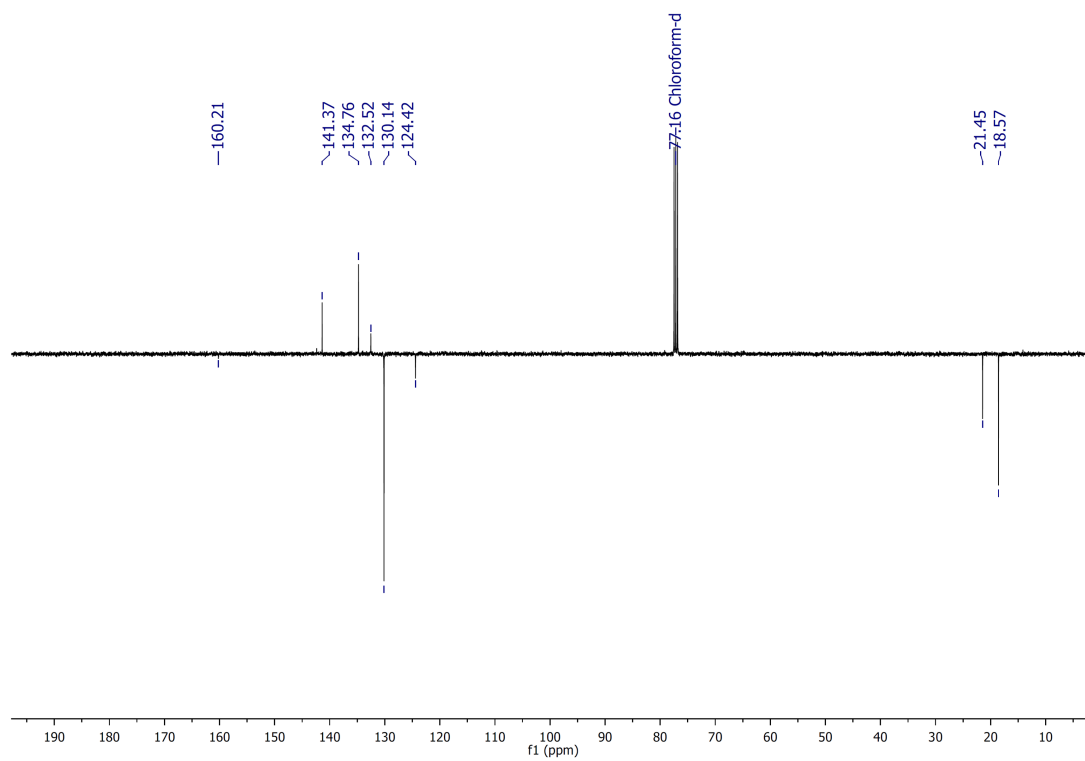

$^{77}\text{Se}$  NMR

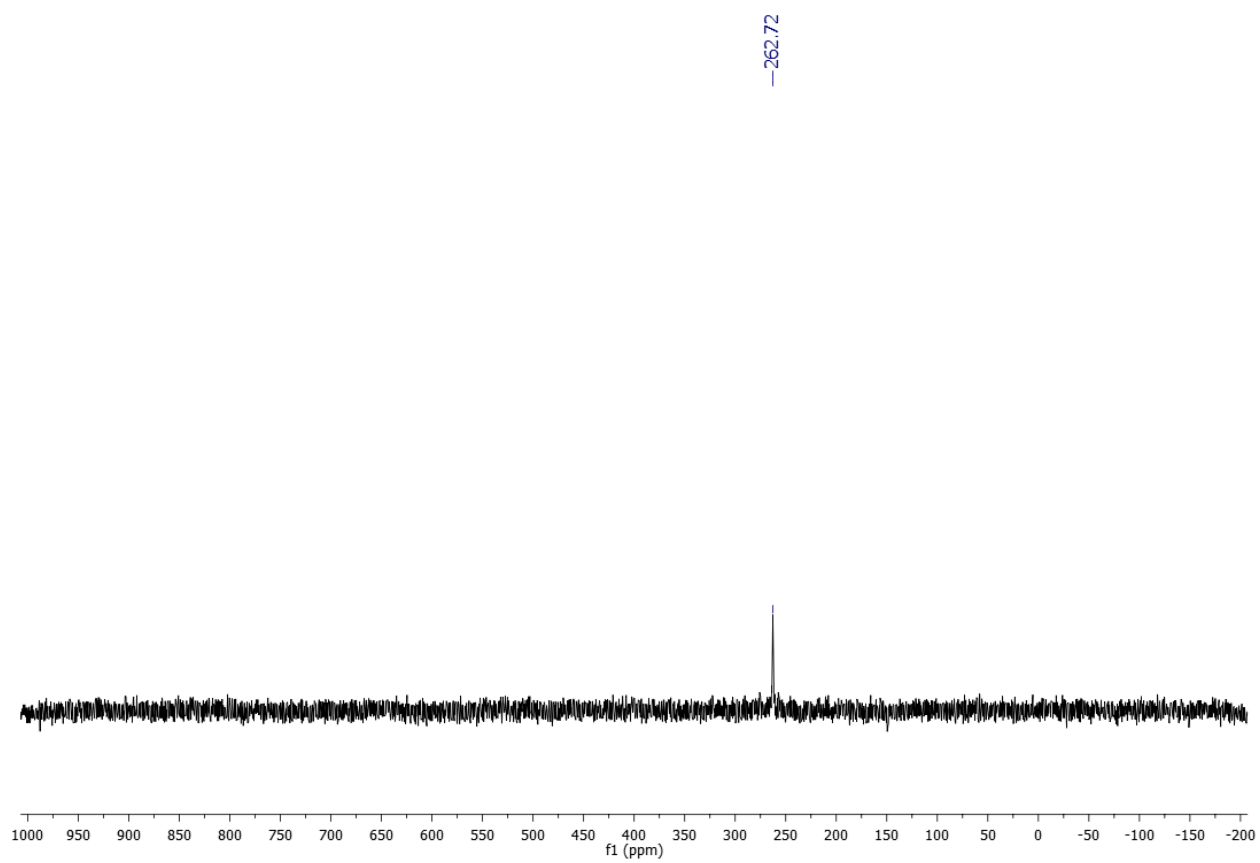

**[(I<sub>2</sub>)-Se(SIMes)]**

<sup>1</sup>H NMR

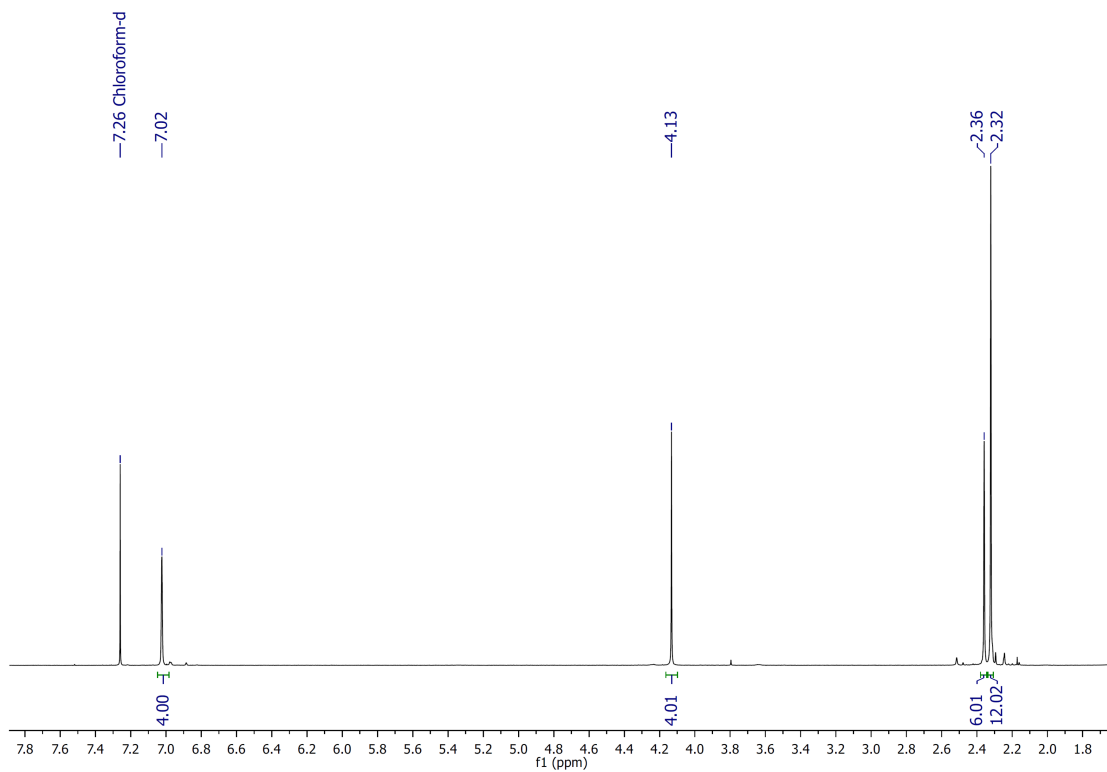

<sup>13</sup>C{<sup>1</sup>H} DEPT Q NMR

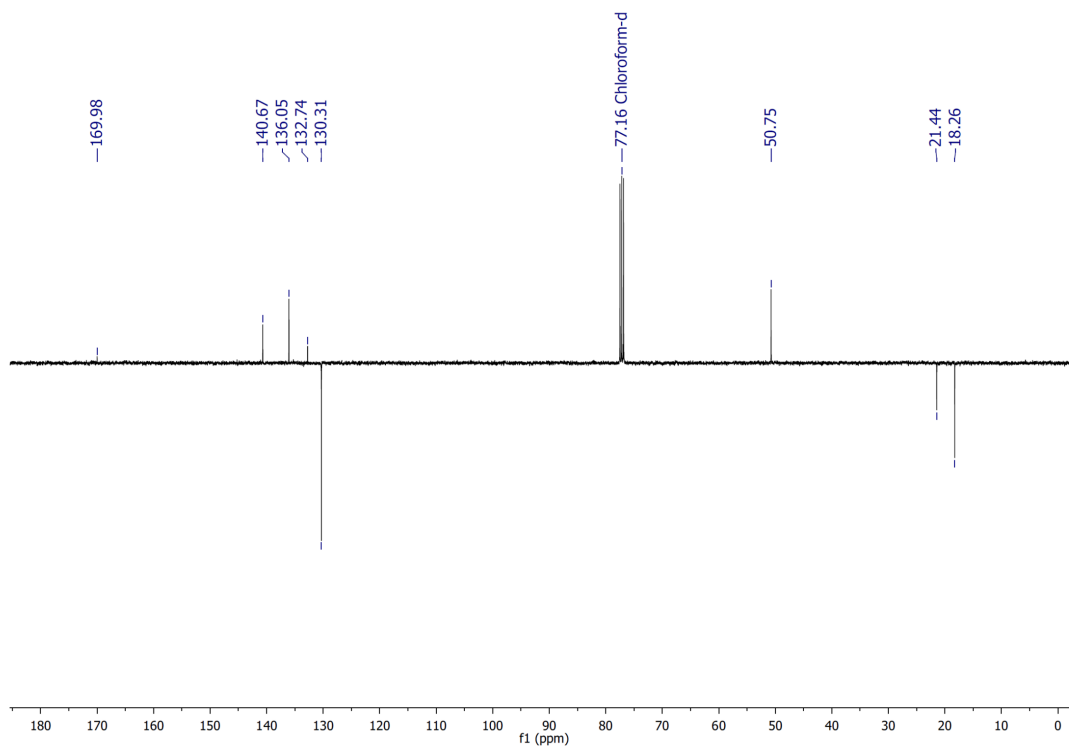

$^{77}\text{Se}$  NMR

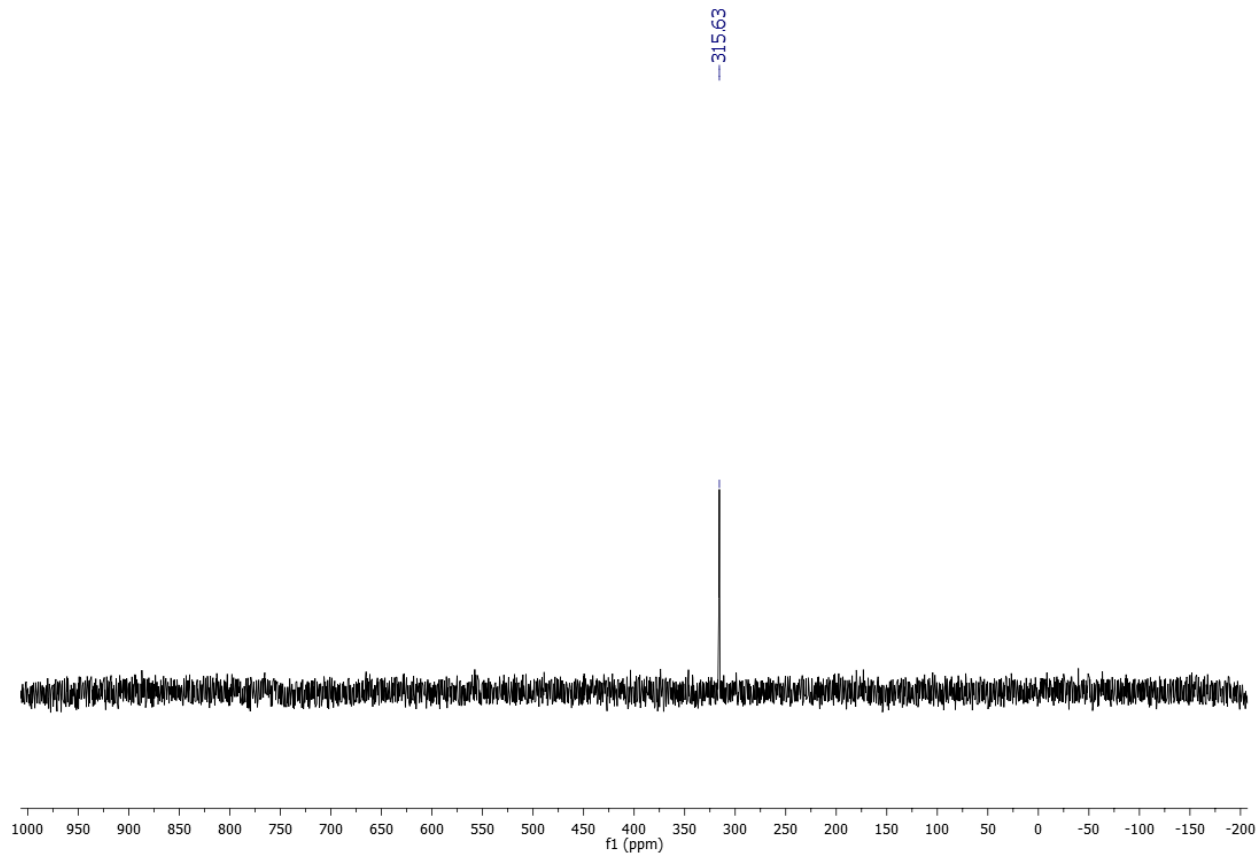



[Se(IPr<sup>Me</sup>)]<sub>3</sub>  
<sup>1</sup>H NMR

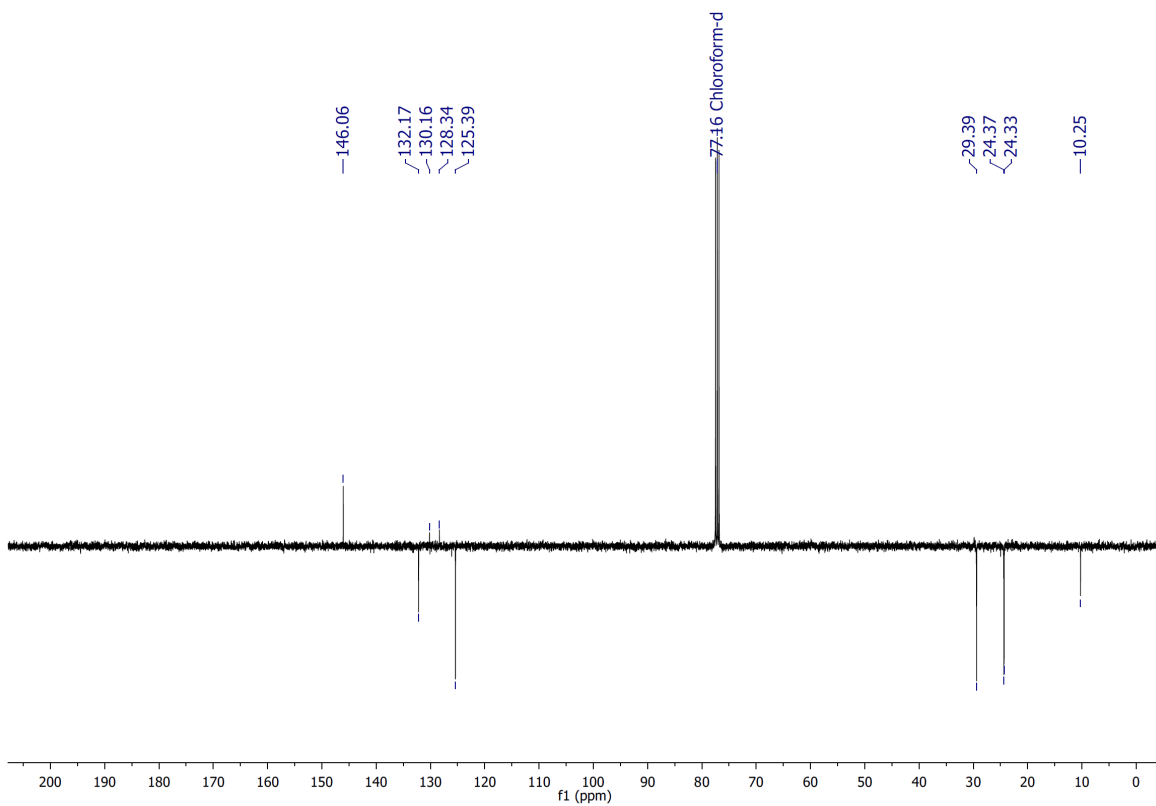

<sup>13</sup>C{<sup>1</sup>H} DEPT Q NMR

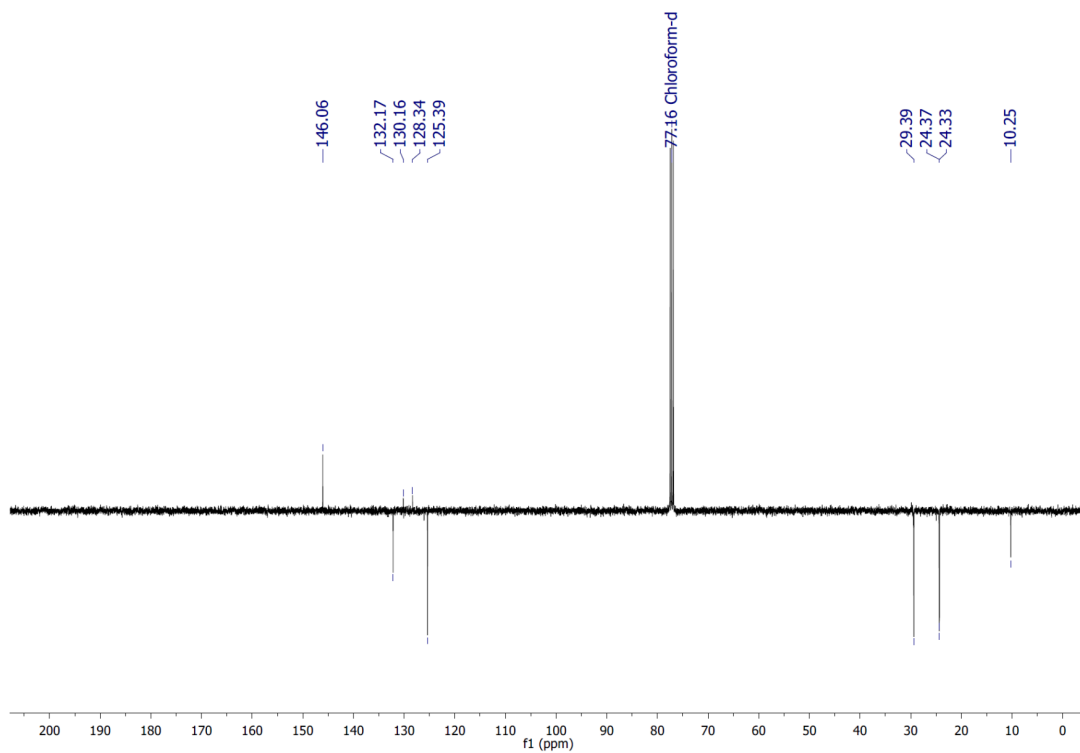

$^{77}\text{Se}$  NMR

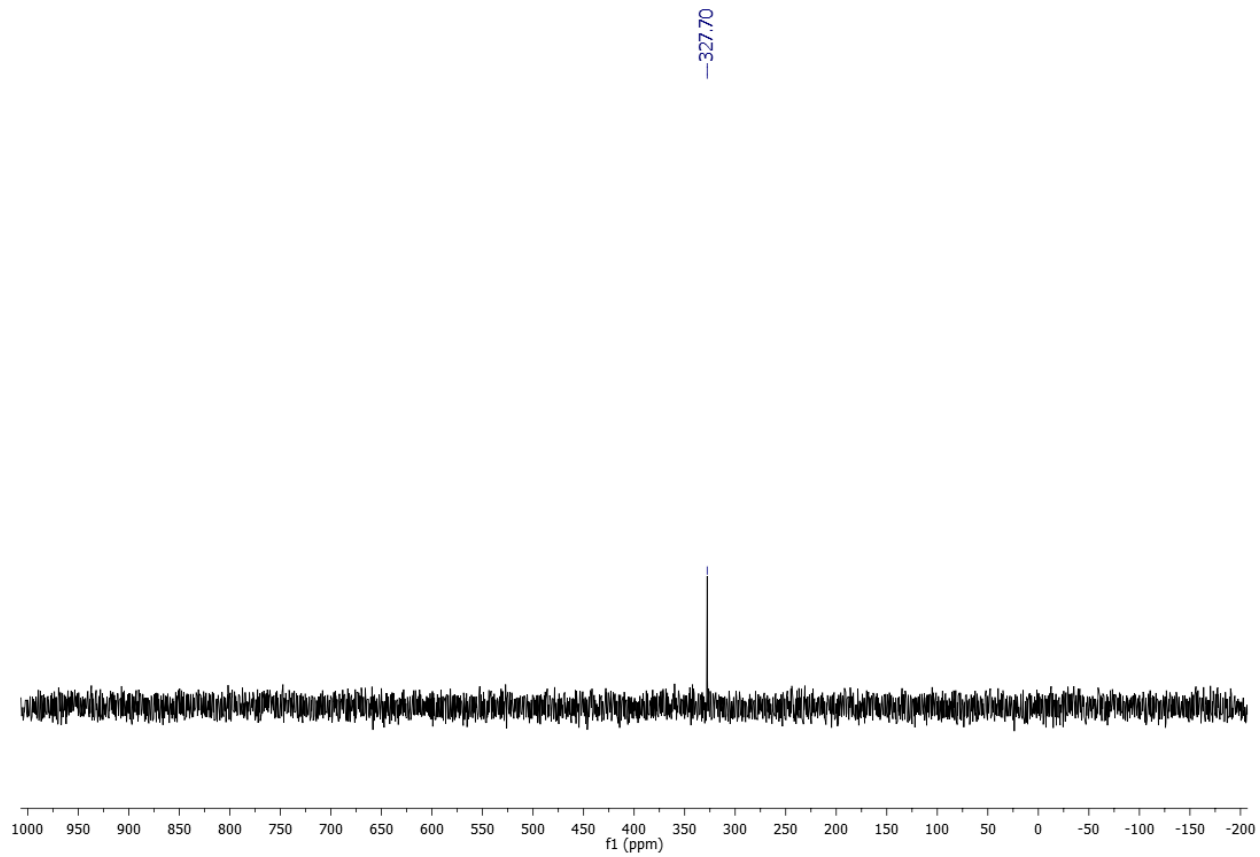

**[(I<sub>2</sub>)·Se(IPr<sup>Cl</sup>)]**  
<sup>1</sup>H NMR

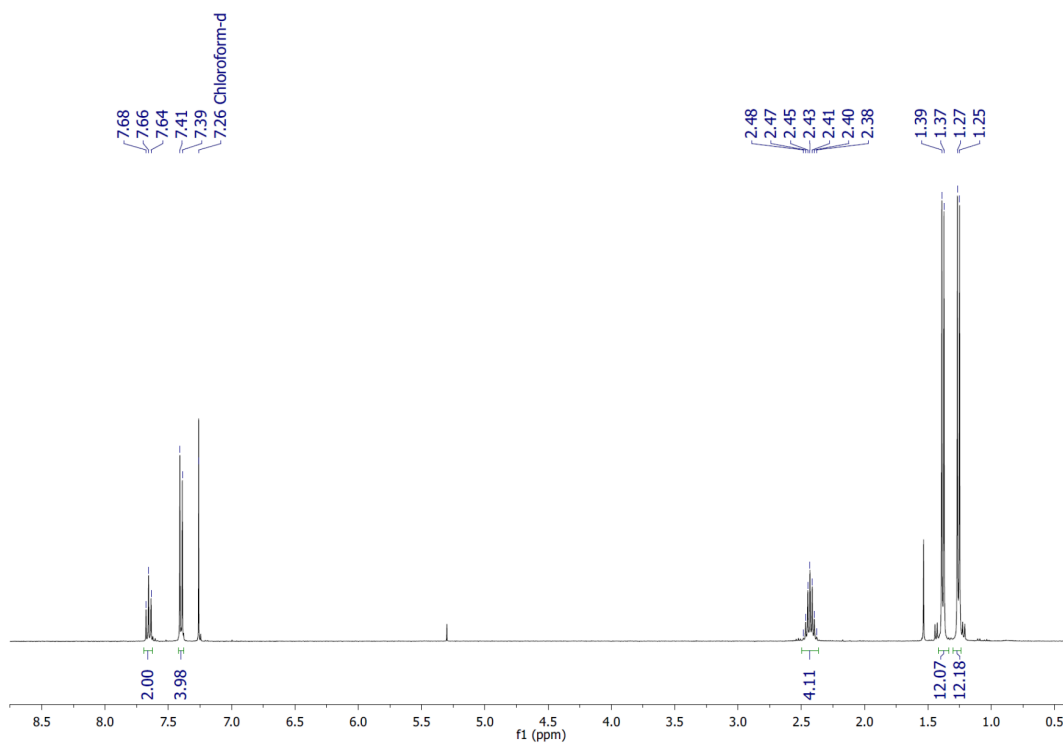

<sup>13</sup>C{<sup>1</sup>H} DEPT Q NMR

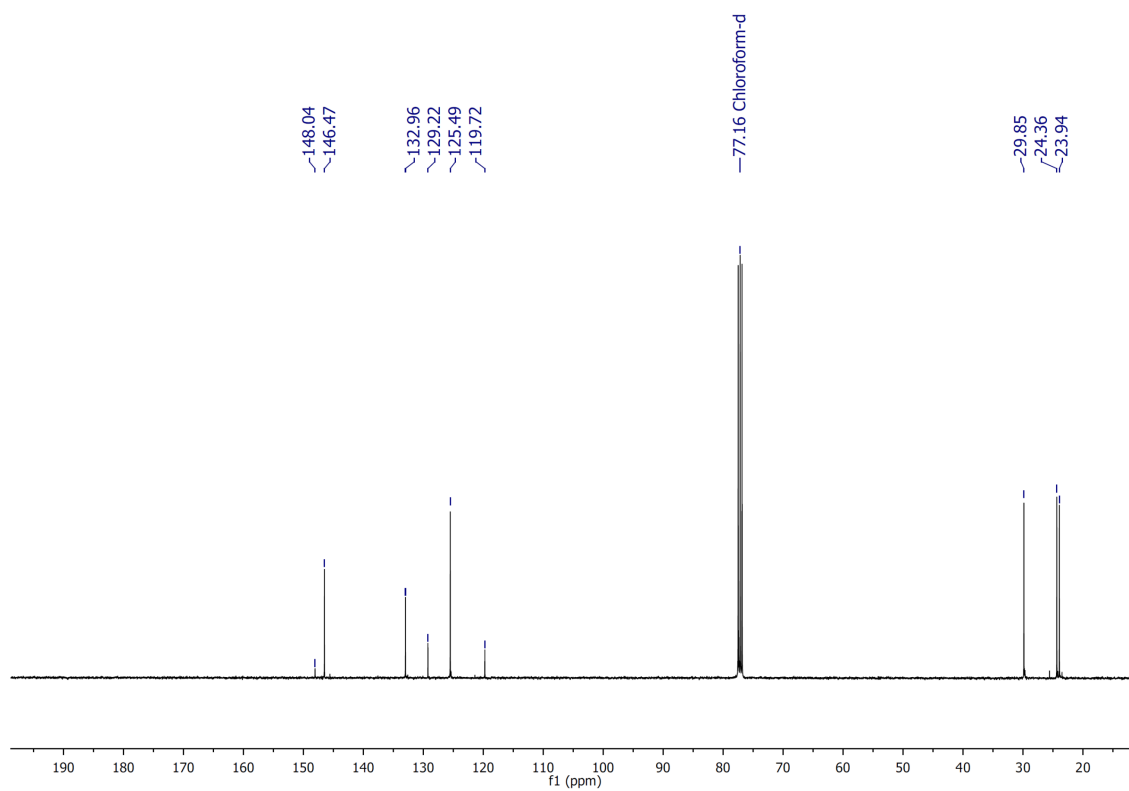

$^{77}\text{Se}$  NMR

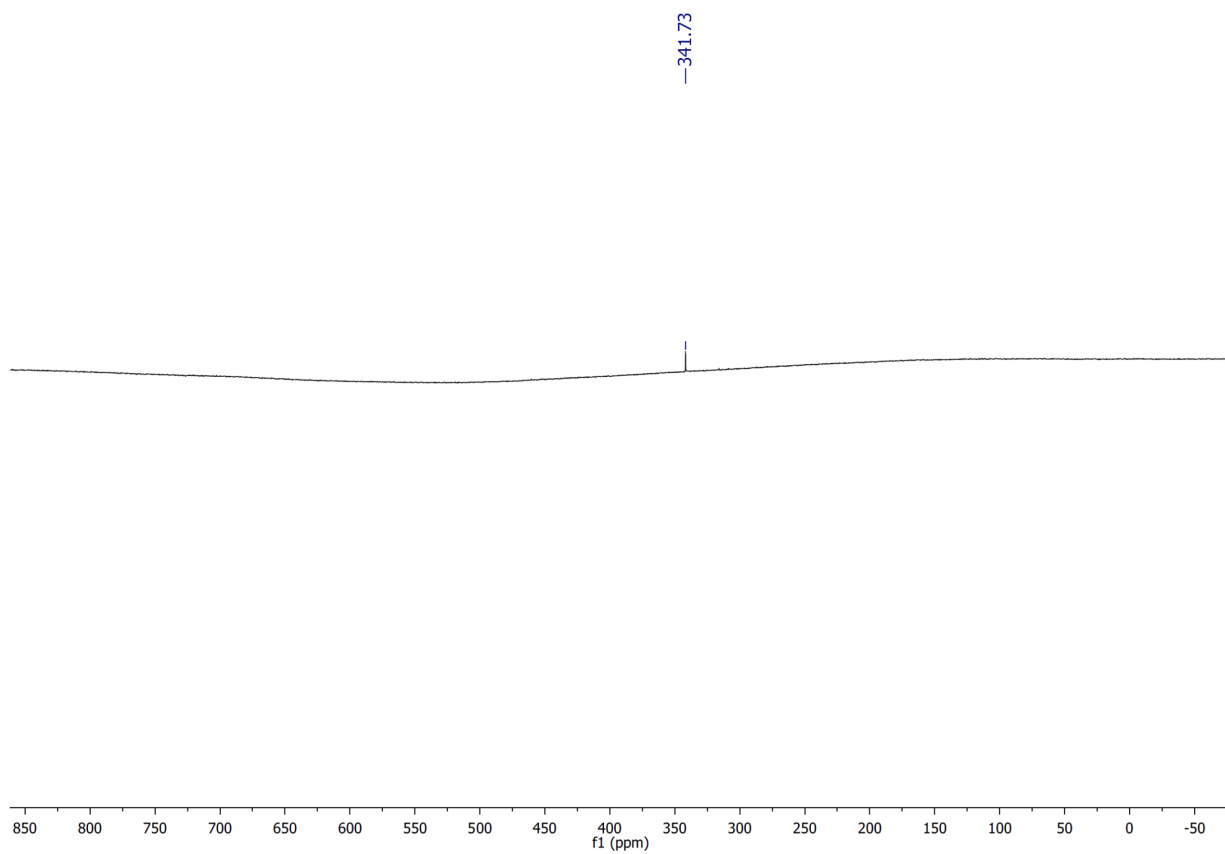

[SeI<sub>2</sub>(ICy)]  
<sup>1</sup>H NMR

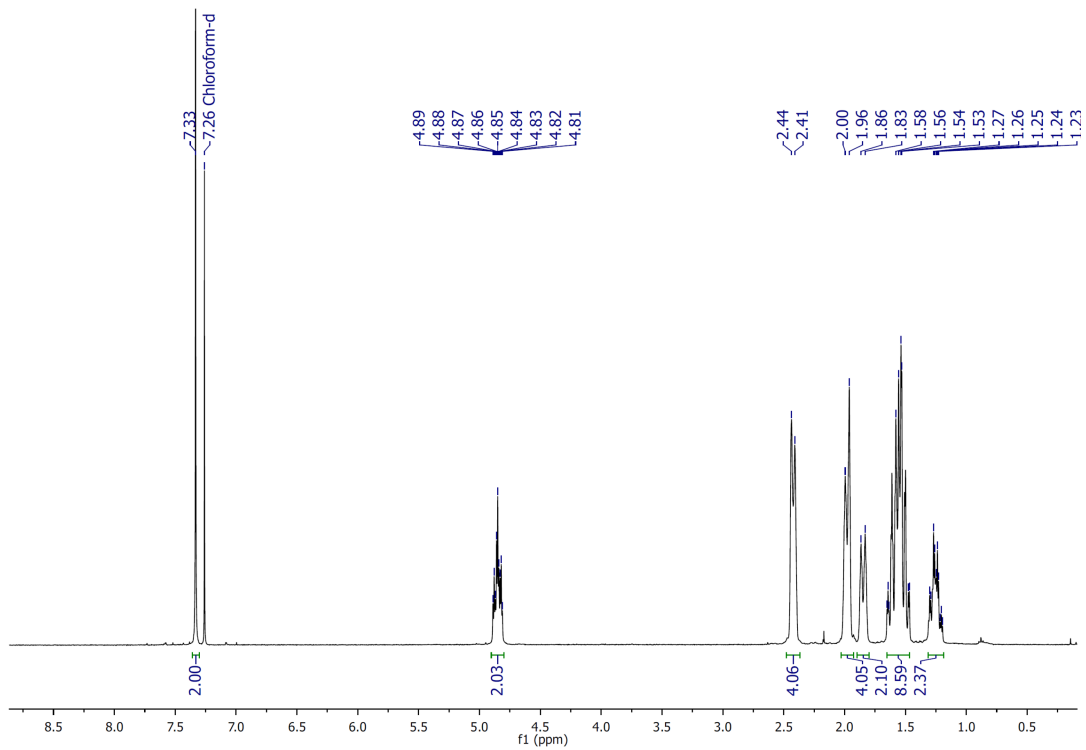

<sup>13</sup>C{<sup>1</sup>H} DEPT Q NMR

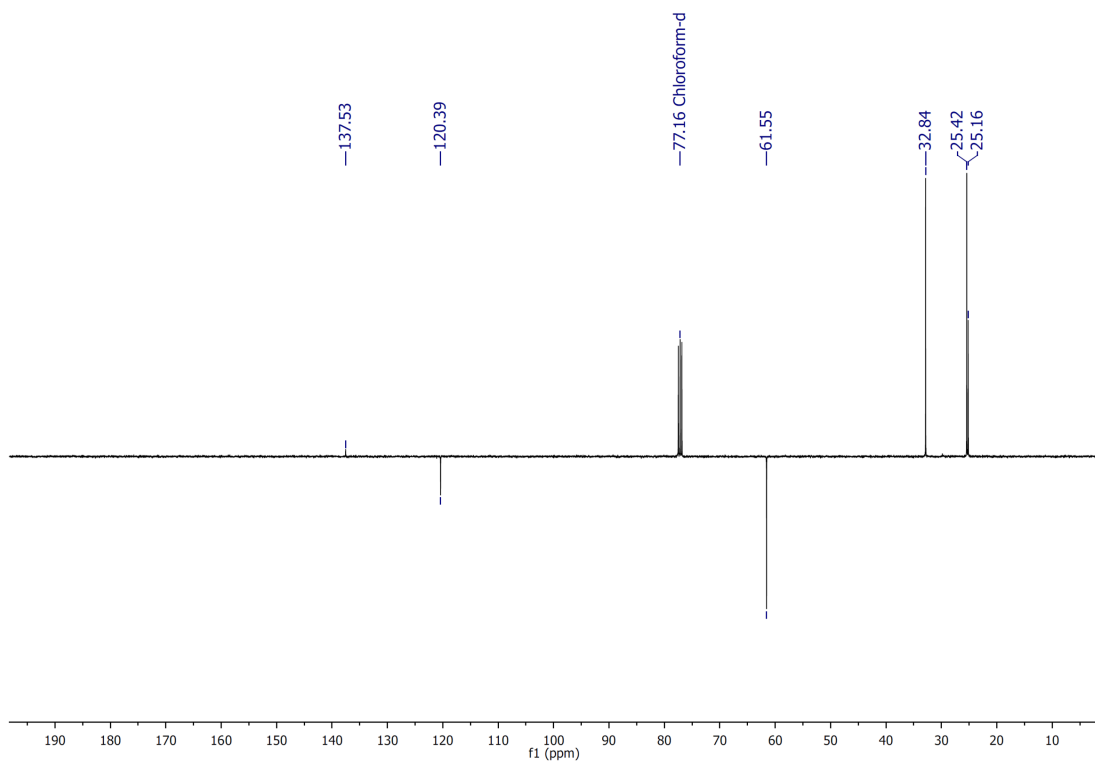

$^{77}\text{Se}$  NMR

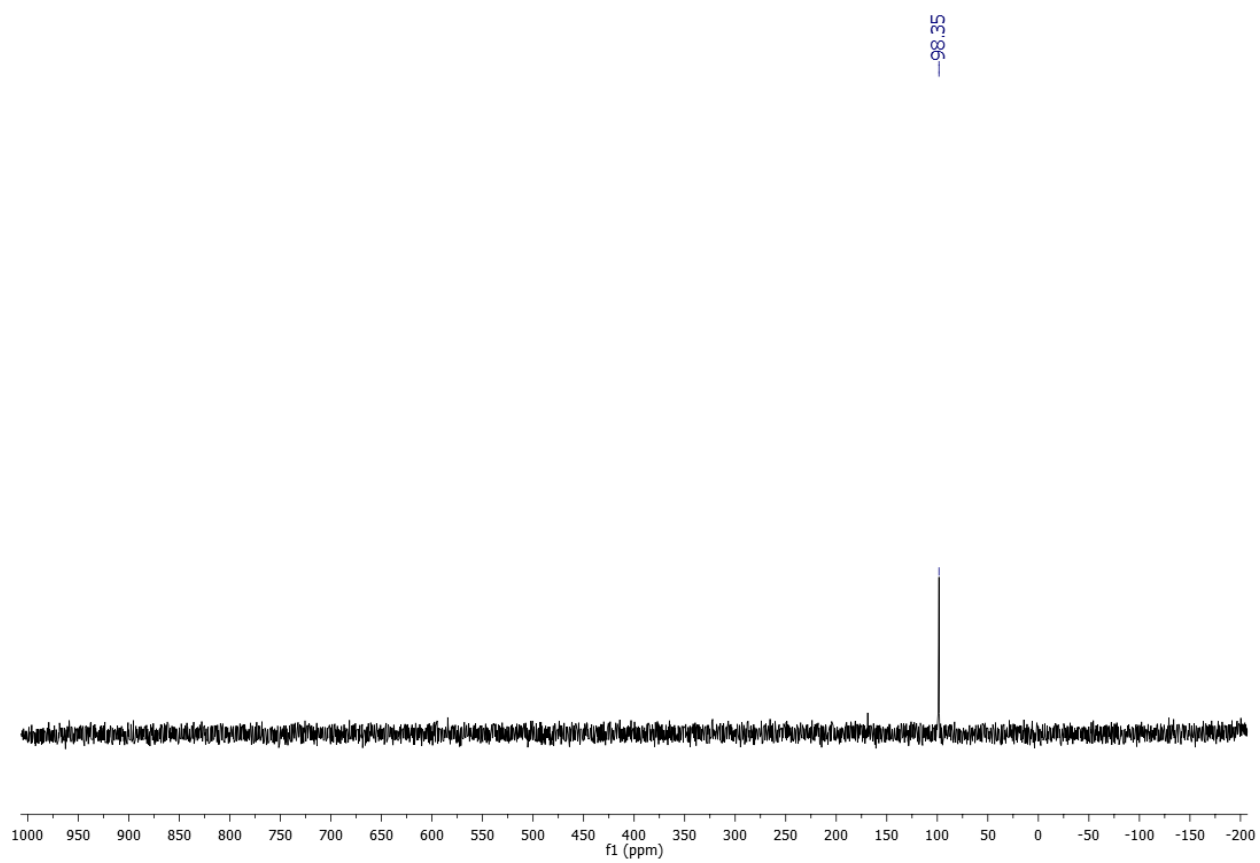

[(I<sub>2</sub>)-Se(IPr\*)]  
<sup>1</sup>H NMR

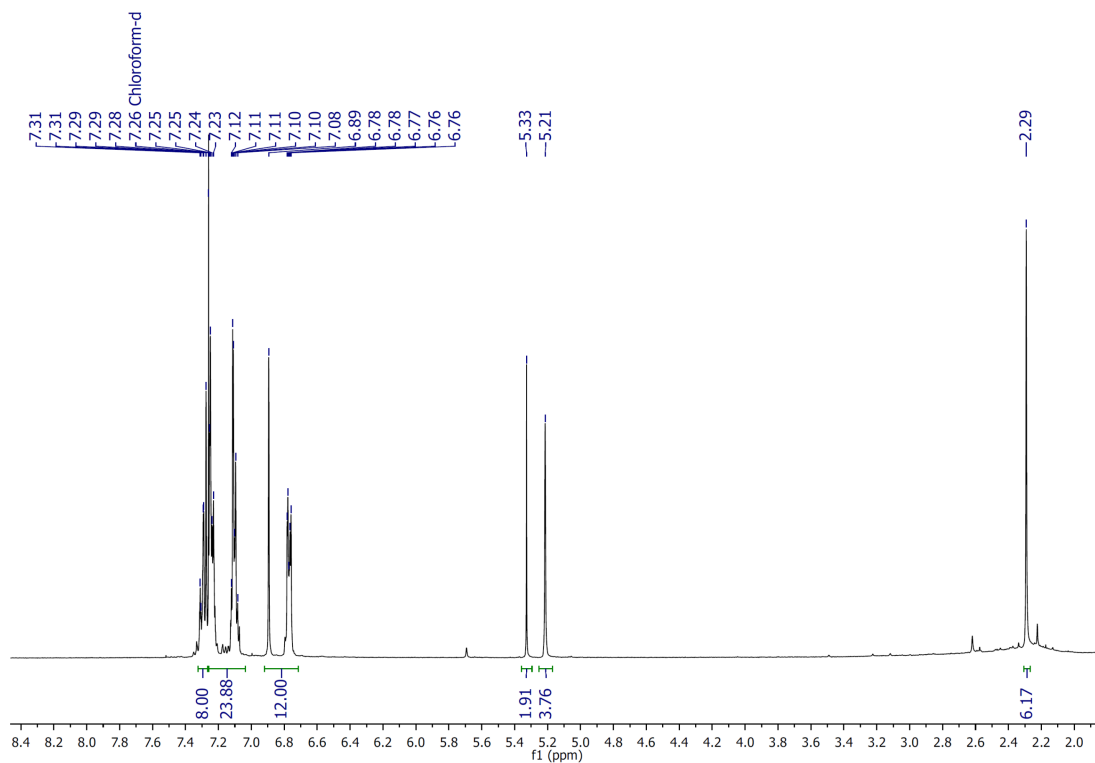

<sup>13</sup>C{<sup>1</sup>H} DEPT Q NMR

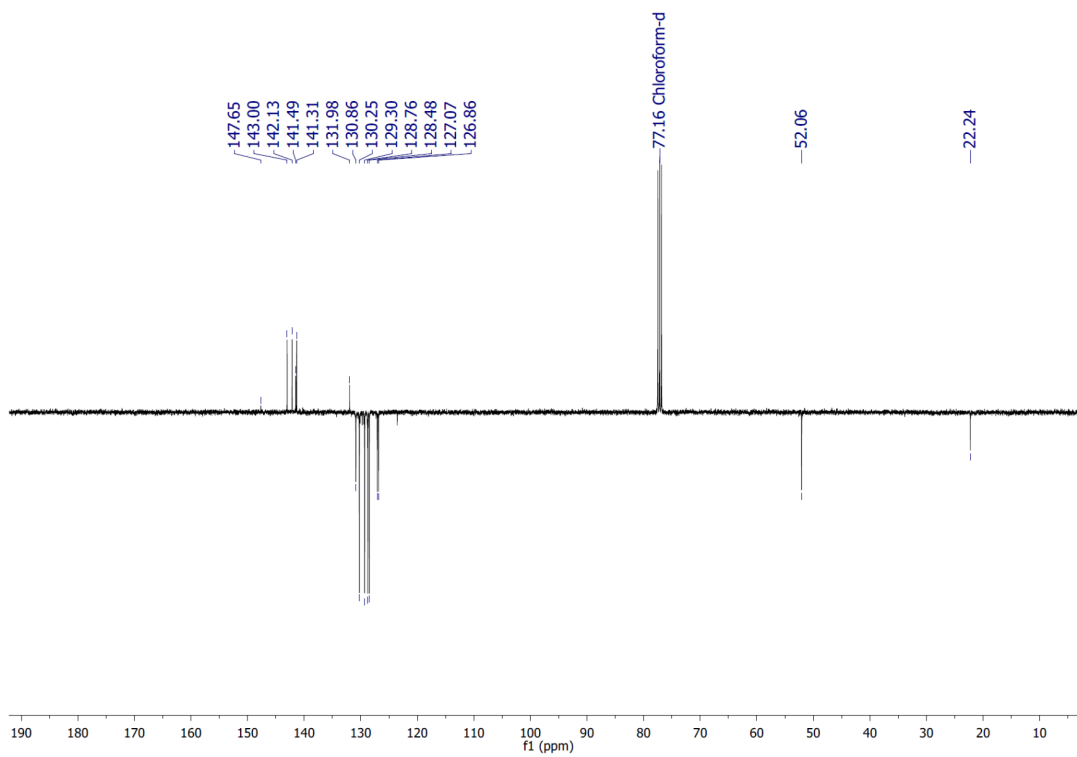

$^{77}\text{Se}$  NMR

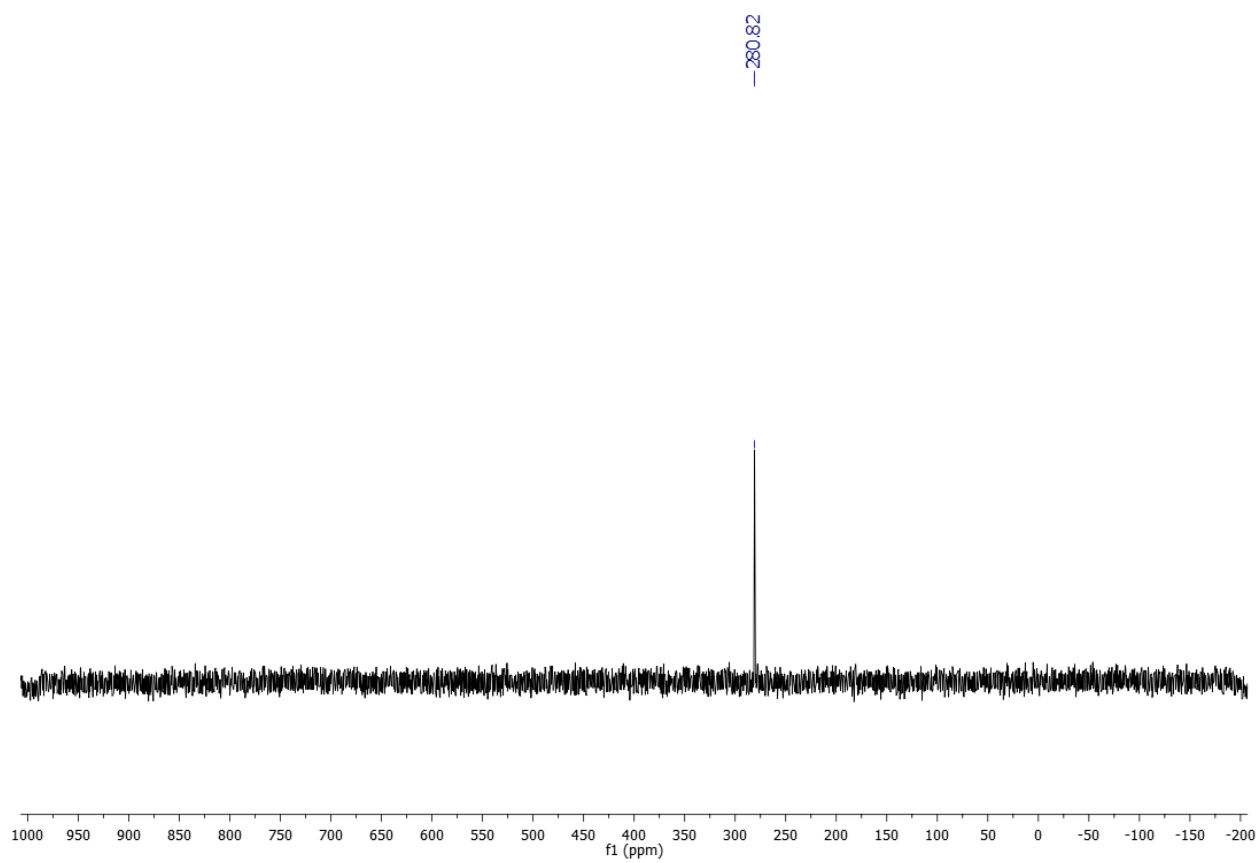



[(1<sub>2</sub>)-S(IPr)]  
<sup>1</sup>H NMR

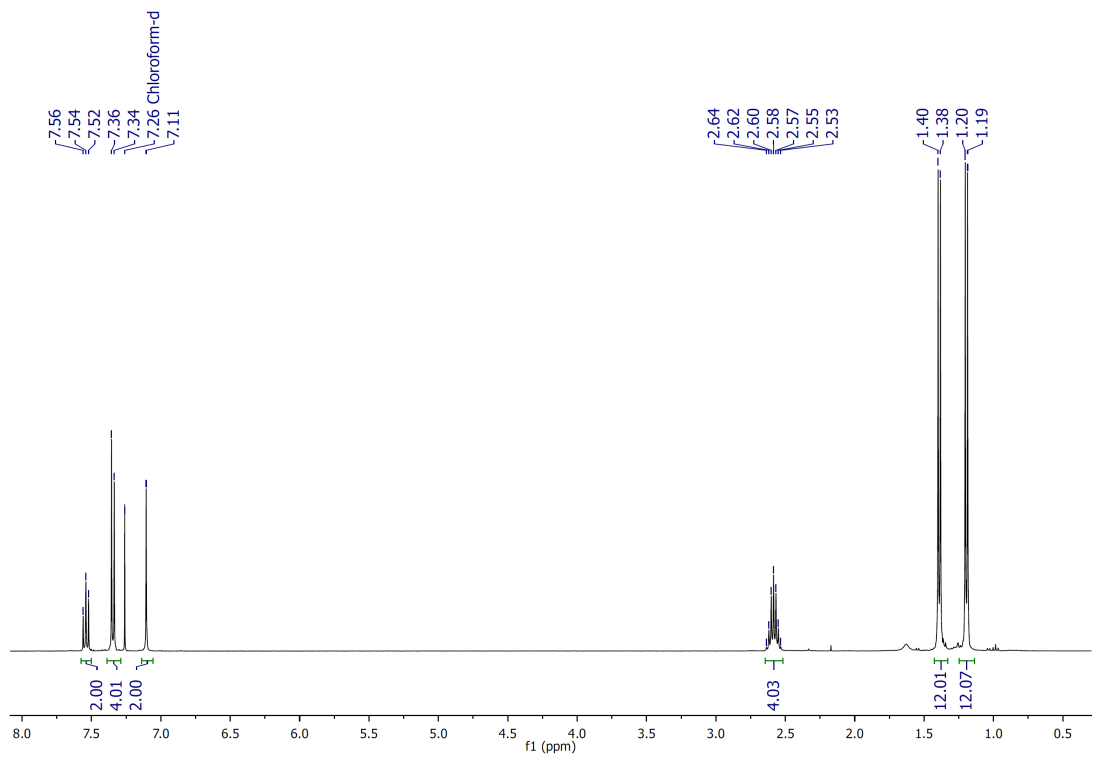

<sup>13</sup>C{<sup>1</sup>H} DEPT Q NMR

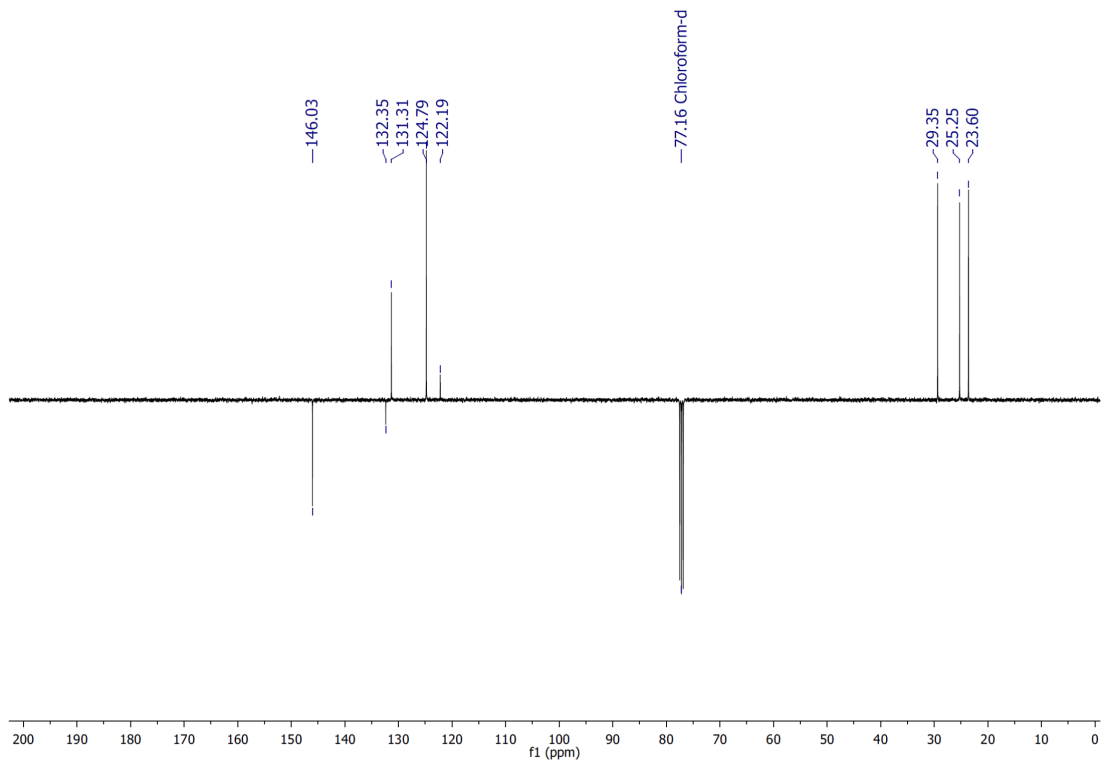

[(I<sub>2</sub>)-S(SiPr)]  
<sup>1</sup>H NMR

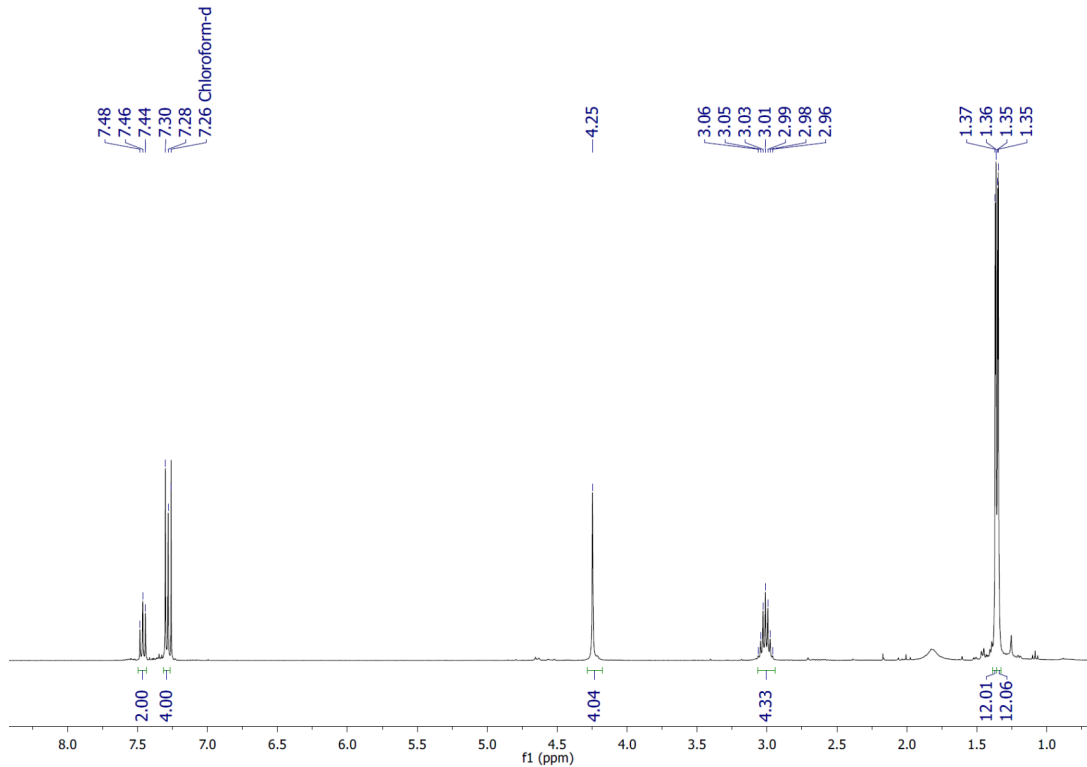

<sup>13</sup>C{<sup>1</sup>H} DEPT Q NMR

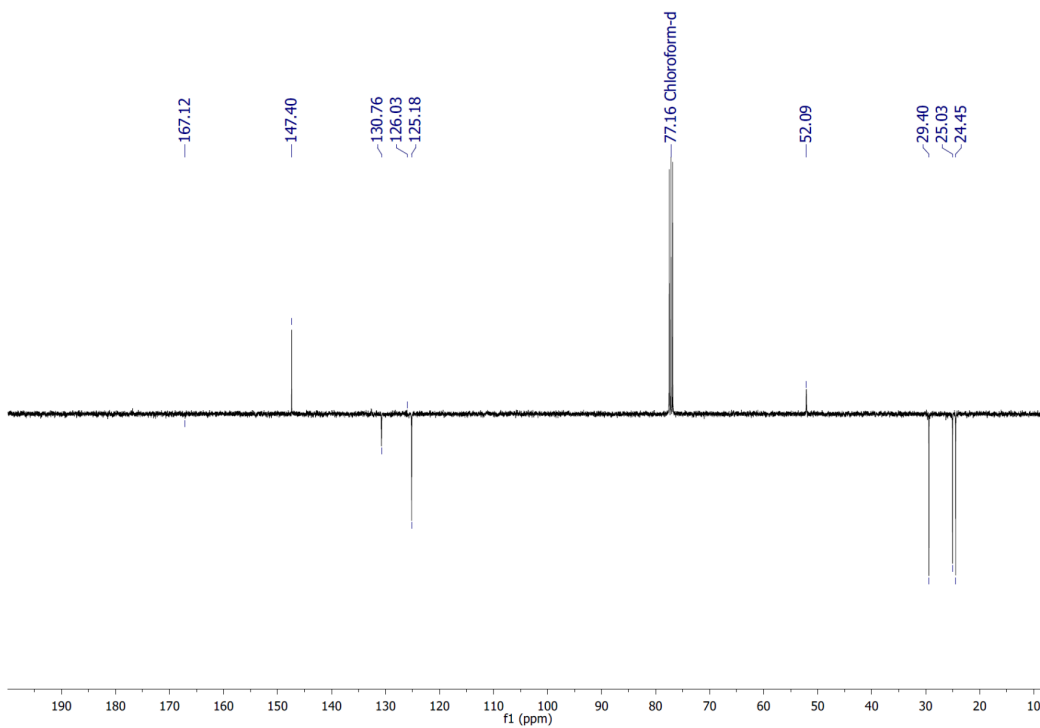

**[(I<sub>2</sub>)-S(IMes)]**  
<sup>1</sup>H NMR

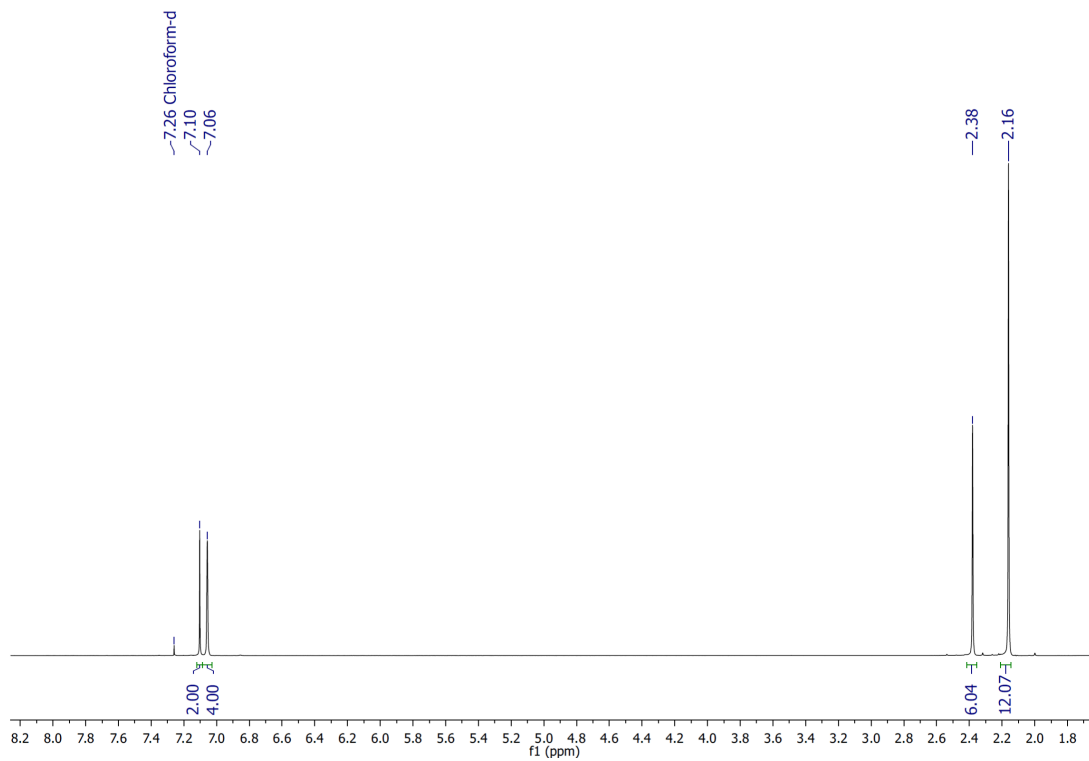

<sup>13</sup>C{<sup>1</sup>H} DEPT Q NMR

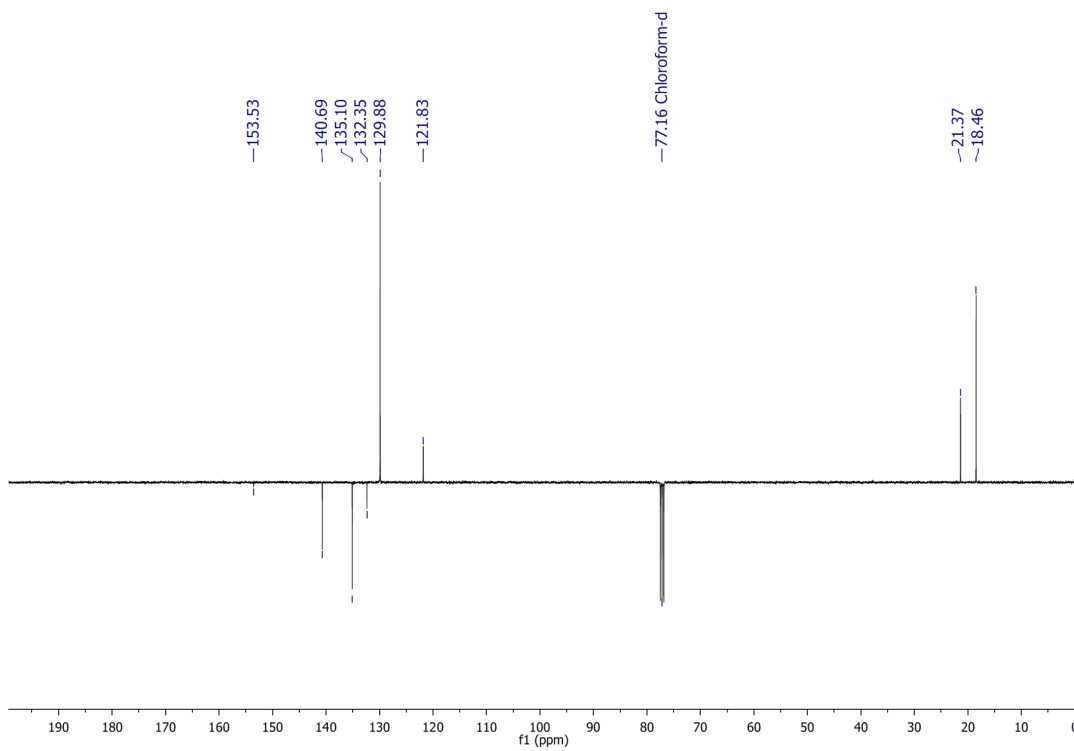

[(1<sub>2</sub>)-S(SiMes)]  
<sup>1</sup>H NMR

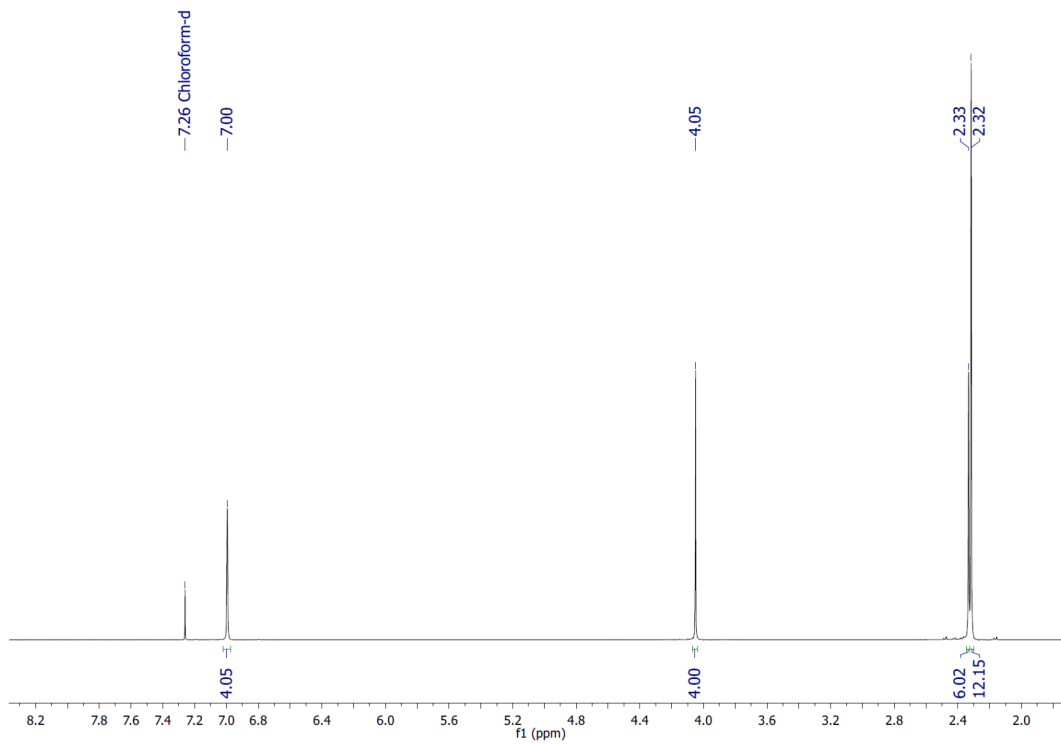

<sup>13</sup>C{<sup>1</sup>H} DEPT Q NMR

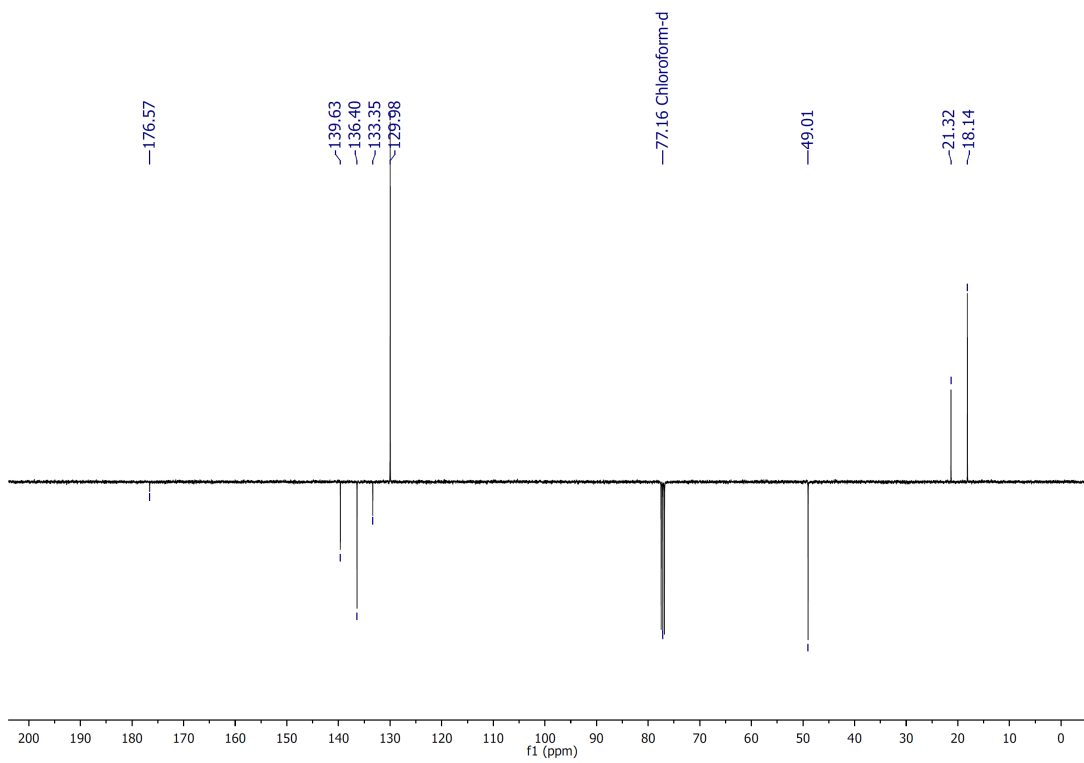

[(1<sub>2</sub>)-S(IPr<sup>Me</sup>)]  
<sup>1</sup>H NMR

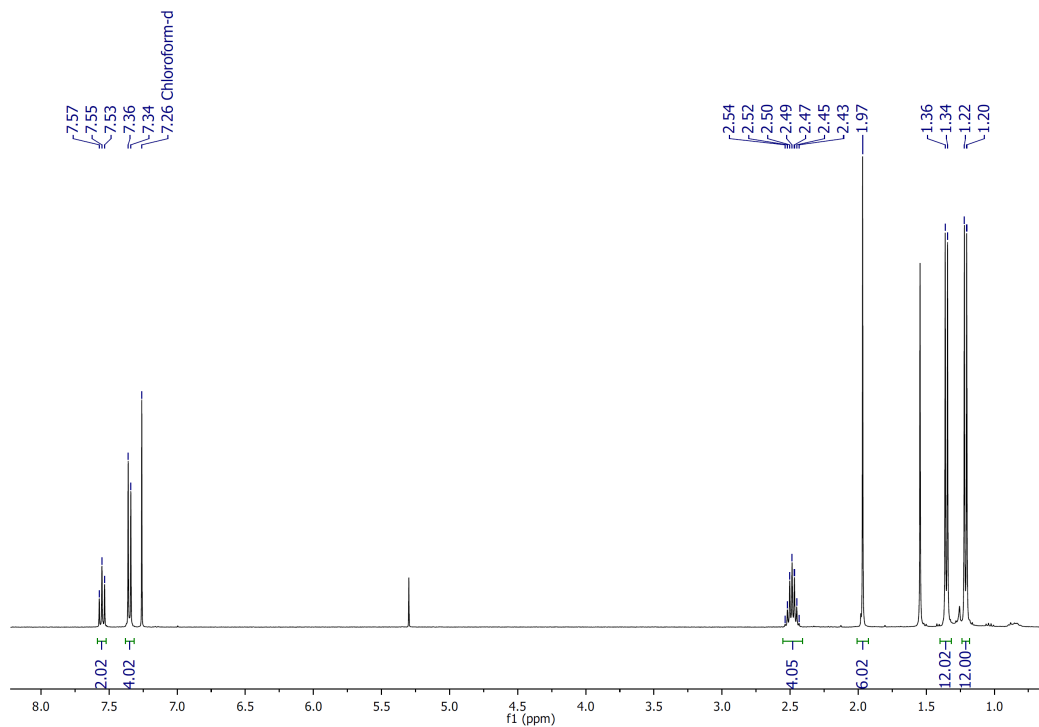

<sup>13</sup>C{<sup>1</sup>H} DEPT Q NMR

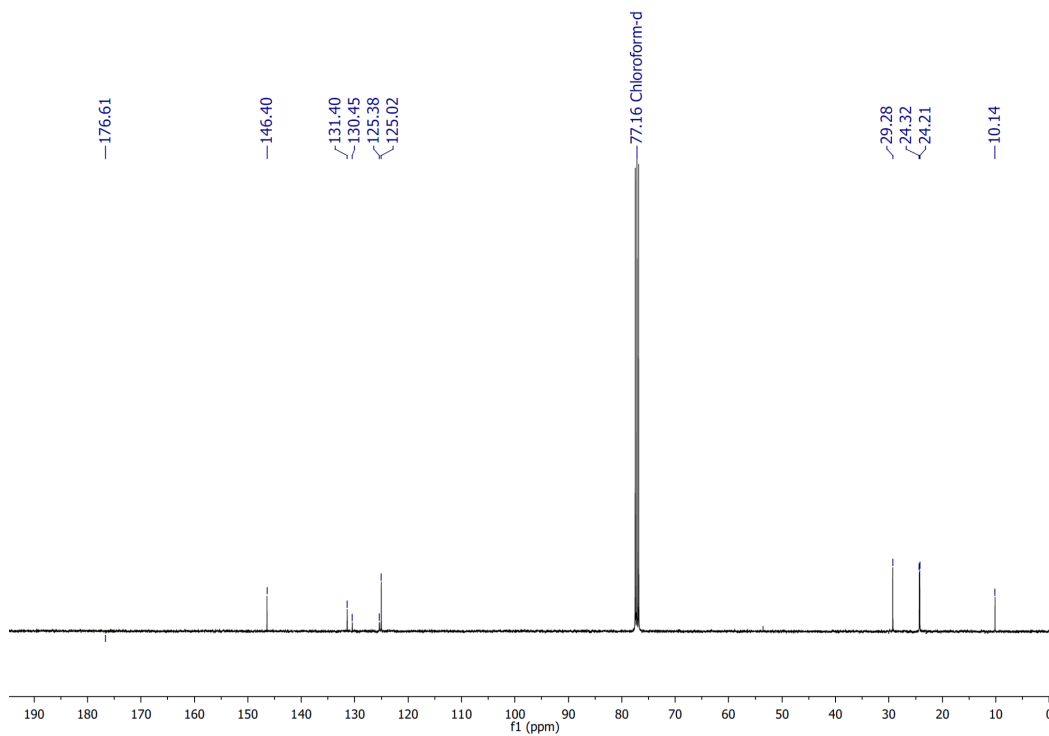

[(1<sub>2</sub>)-S(IPr<sup>Cl</sup>)]  
<sup>1</sup>H NMR

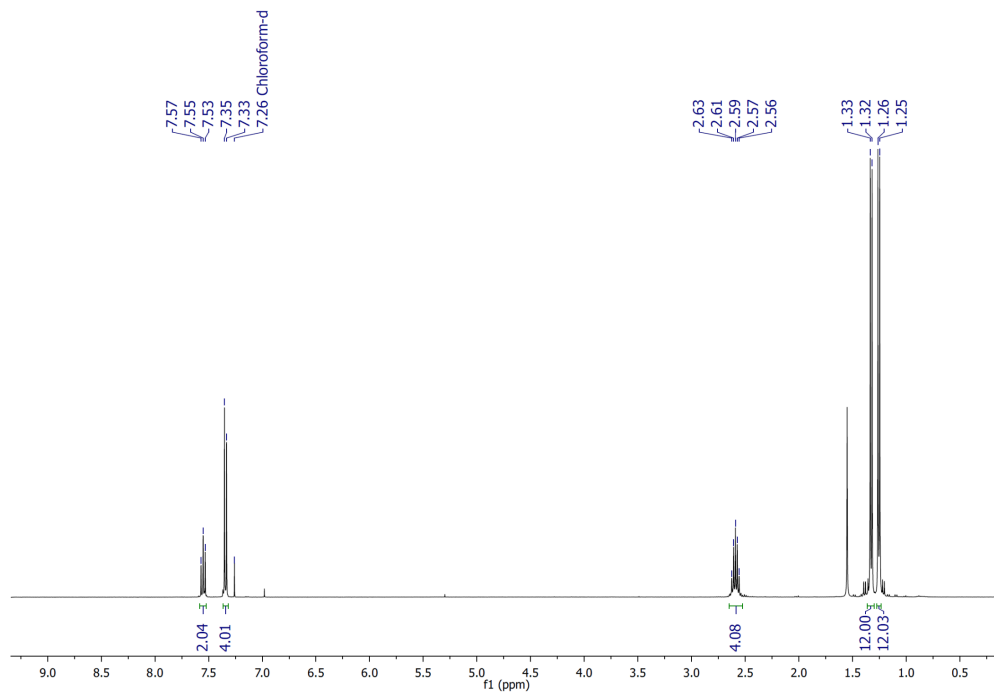

<sup>13</sup>C{<sup>1</sup>H} DEPT Q NMR

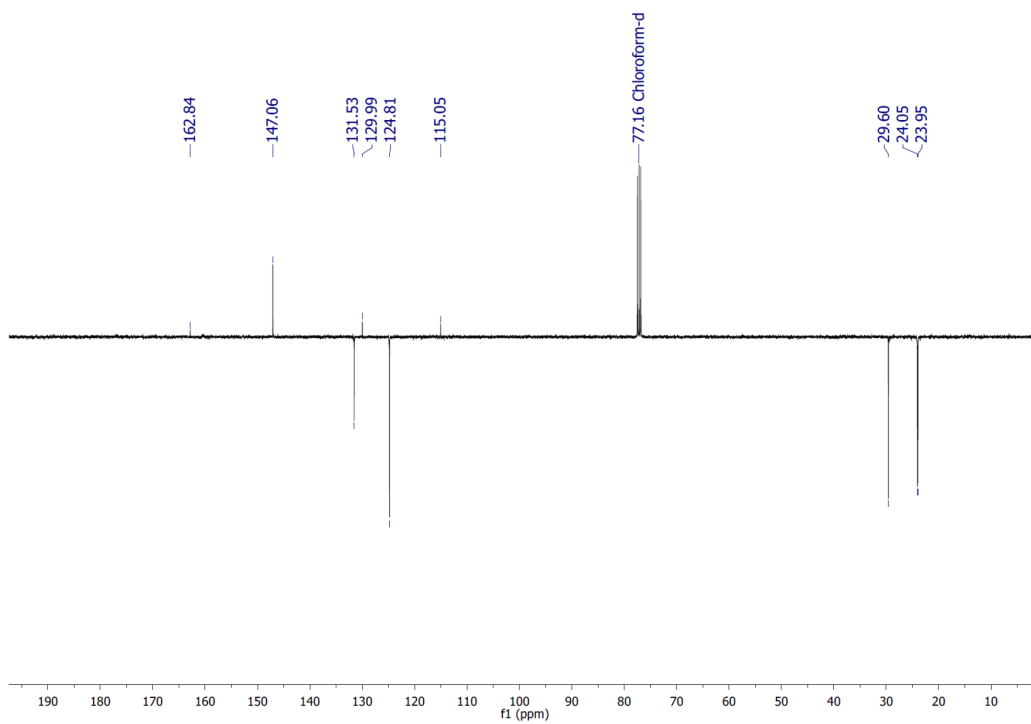

[(1<sub>2</sub>)-S(ICy)]  
<sup>1</sup>H NMR

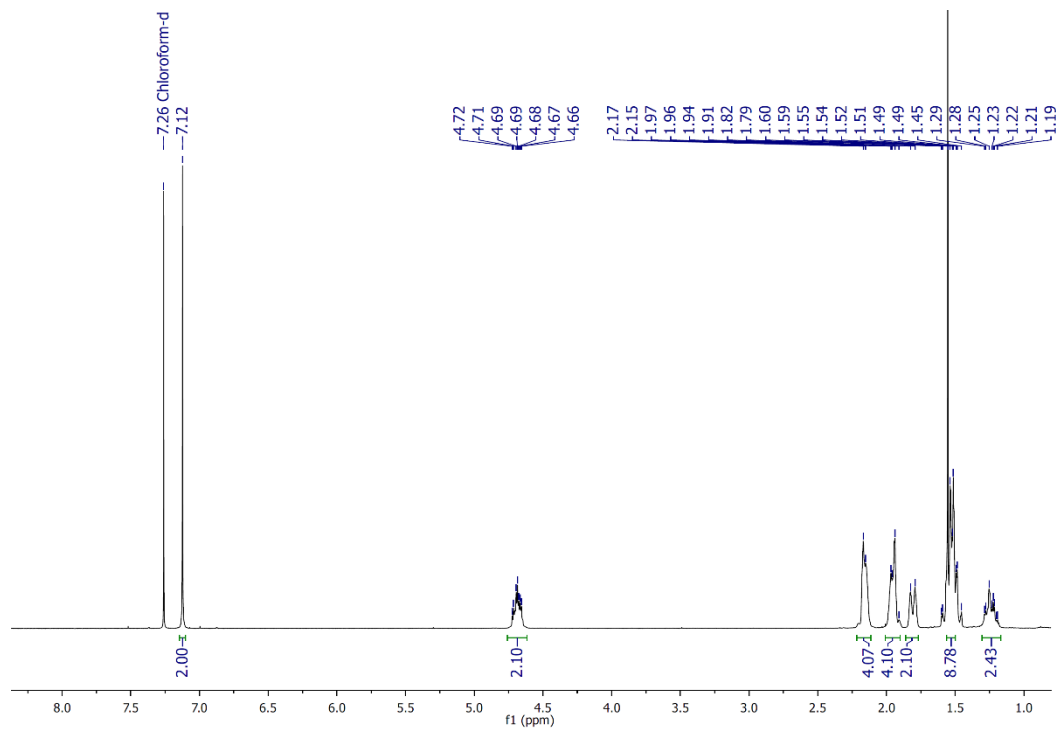

<sup>13</sup>C{<sup>1</sup>H} DEPT Q NMR

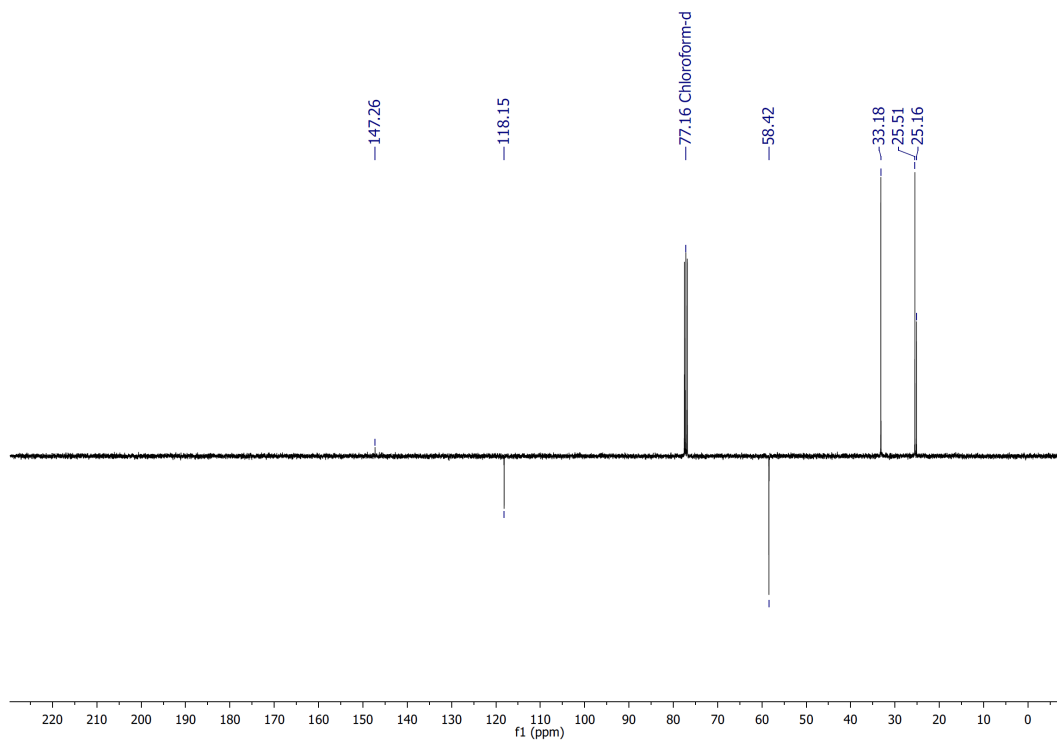

[(1<sub>2</sub>)-S(IPr\*)]  
<sup>1</sup>H NMR

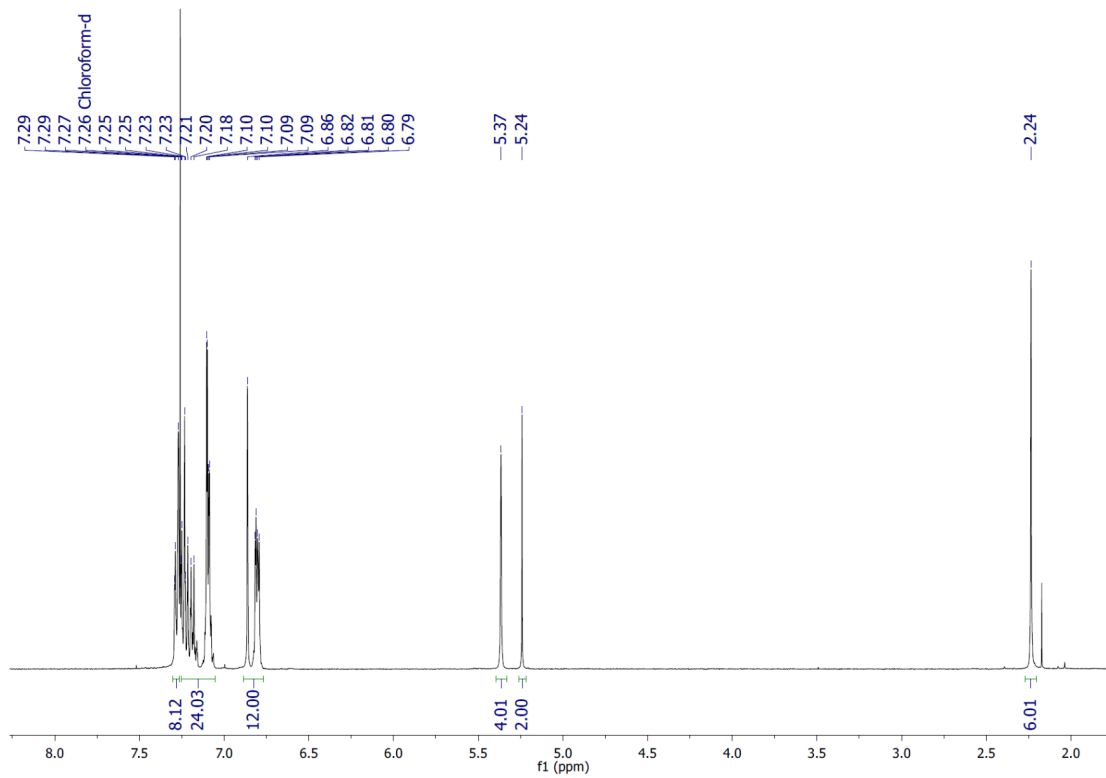

<sup>13</sup>C{<sup>1</sup>H} DEPT Q NMR

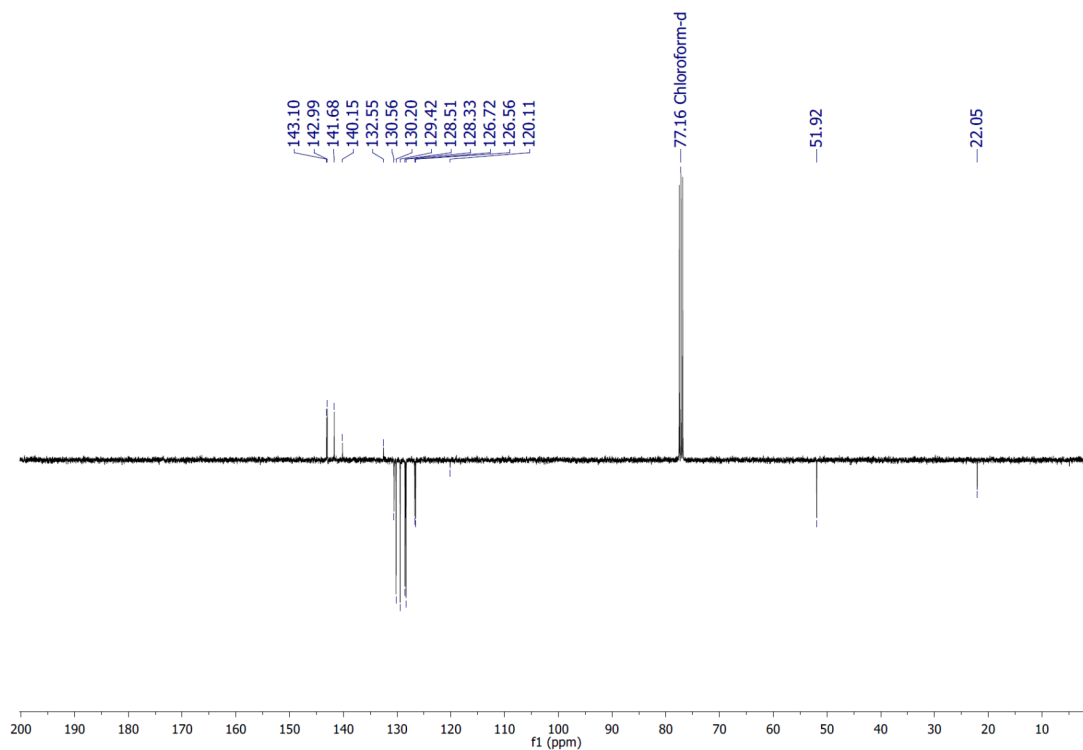



## Crystallographic data

|                                                       | [SeBr <sub>2</sub> (IPr)]                                         | [SeBr(SIPr)]Br <sub>3</sub>                                       | [SeBr <sub>2</sub> (IMes)]                                        | [SeBr <sub>2</sub> (SIMes)]                                       |
|-------------------------------------------------------|-------------------------------------------------------------------|-------------------------------------------------------------------|-------------------------------------------------------------------|-------------------------------------------------------------------|
| CCDC no.                                              | 2121842                                                           | 2121843                                                           | 2121844                                                           | 2121845                                                           |
| Empirical formula                                     | C <sub>27</sub> H <sub>36</sub> Br <sub>2</sub> N <sub>2</sub> Se | C <sub>27</sub> H <sub>38</sub> Br <sub>4</sub> N <sub>2</sub> Se | C <sub>21</sub> H <sub>24</sub> Br <sub>2</sub> N <sub>2</sub> Se | C <sub>21</sub> H <sub>26</sub> Br <sub>2</sub> N <sub>2</sub> Se |
| Formula weight (g mol <sup>-1</sup> )                 | 627.34                                                            | 789.15                                                            | 543.18                                                            | 545.20                                                            |
| T (K)                                                 | 100                                                               | 100                                                               | 100                                                               | 100                                                               |
| λ (Å)                                                 | 1.54184                                                           | 1.54184                                                           | 1.54184                                                           | 1.54184                                                           |
| Crystal system                                        | orthorhombic                                                      | monoclinic                                                        | orthorhombic                                                      | orthorhombic                                                      |
| Space group                                           | Pnma                                                              | P2 <sub>1</sub> /n                                                | Pnma                                                              | Aea2                                                              |
| a (Å)                                                 | 12.3667(2)                                                        | 9.72480(10)                                                       | 19.6139(4)                                                        | 18.5263(6)                                                        |
| b (Å)                                                 | 20.3331(4)                                                        | 18.3045(2)                                                        | 14.3164(3)                                                        | 15.6201(6)                                                        |
| c (Å)                                                 | 10.4430(2)                                                        | 17.8287(3)                                                        | 7.58200(10)                                                       | 7.3666(2)                                                         |
| α (°)                                                 | 90                                                                | 90                                                                | 90                                                                | 90                                                                |
| β (°)                                                 | 90                                                                | 98.1660(10)                                                       | 90                                                                | 90                                                                |
| γ (°)                                                 | 90                                                                | 90                                                                | 90                                                                | 90                                                                |
| V (Å <sup>3</sup> )                                   | 2625.93(8)                                                        | 3141.47(7)                                                        | 2129.03(7)                                                        | 2131.77(12)                                                       |
| Z                                                     | 4                                                                 | 4                                                                 | 4                                                                 | 4                                                                 |
| ρ <sub>calc</sub> (g cm <sup>-3</sup> )               | 1.587                                                             | 1.669                                                             | 1.695                                                             | 1.699                                                             |
| μ (mm <sup>-1</sup> )                                 | 5.620                                                             | 7.703                                                             | 6.829                                                             | 6.821                                                             |
| F (000)                                               | 1264.0                                                            | 1552.0                                                            | 1072.0                                                            | 1080.0                                                            |
| Crystal dimensions (mm <sup>3</sup> )                 | 0.095 × 0.061 × 0.039                                             | 0.209 × 0.085 × 0.061                                             | 0.181 × 0.127 × 0.052                                             | 0.16 × 0.12 × 0.11                                                |
| 2θ max (°)                                            | 147.572                                                           | 147.848                                                           | 147.736                                                           | 147.798                                                           |
| Reflections collected                                 | 12990                                                             | 30317                                                             | 10733                                                             | 5586                                                              |
| Independent reflections                               | 2675                                                              | 6259                                                              | 2137                                                              | 2000                                                              |
| Parameters refined                                    | 155                                                               | 315                                                               | 122                                                               | 122                                                               |
| Final R indexes [I <sub>0</sub> >2σ(I <sub>0</sub> )] | R <sub>1</sub> = 0.0294, wR <sub>2</sub> = 0.0584                 | R <sub>1</sub> = 0.0290, wR <sub>2</sub> = 0.0567                 | R <sub>1</sub> = 0.0255, wR <sub>2</sub> = 0.0601                 | R <sub>1</sub> = 0.0392, wR <sub>2</sub> = 0.0958                 |
| R indexes (all data)                                  | R <sub>1</sub> = 0.0433, wR <sub>2</sub> = 0.0636                 | R <sub>1</sub> = 0.0428, wR <sub>2</sub> = 0.0617                 | R <sub>1</sub> = 0.0331, wR <sub>2</sub> = 0.0635                 | R <sub>1</sub> = 0.0471, wR <sub>2</sub> = 0.1008                 |
| Goodness-of-fit on F <sup>2</sup>                     | 1.015                                                             | 1.067                                                             | 1.044                                                             | 1.034                                                             |

|                                                       | <b>[SeBr<sub>2</sub>(IPr<sup>Me</sup>)]</b>                                       | <b>[SeBr(IPr<sup>Cl</sup>)]Br<sub>3</sub></b>                                     | <b>[SeBr<sub>2</sub>(ICy)]</b>                                    | <b>[(Br<sub>2</sub>)·S(IMes)]</b>                                |
|-------------------------------------------------------|-----------------------------------------------------------------------------------|-----------------------------------------------------------------------------------|-------------------------------------------------------------------|------------------------------------------------------------------|
| CCDC no.                                              | 2121846                                                                           | 2121847                                                                           | 2121848                                                           | 2121849                                                          |
| Empirical formula                                     | C <sub>30</sub> H <sub>42</sub> Br <sub>2</sub> Cl <sub>2</sub> N <sub>2</sub> Se | C <sub>27</sub> H <sub>34</sub> Br <sub>4</sub> Cl <sub>2</sub> N <sub>2</sub> Se | C <sub>15</sub> H <sub>24</sub> Br <sub>2</sub> N <sub>2</sub> Se | C <sub>21</sub> H <sub>24</sub> Br <sub>2</sub> N <sub>2</sub> S |
| Formula weight (g mol <sup>-1</sup> )                 | 740.32                                                                            | 856.02                                                                            | 471.12                                                            | 496.28                                                           |
| T (K)                                                 | 100                                                                               | 100                                                                               | 100                                                               | 100                                                              |
| λ (Å)                                                 | 1.54184                                                                           | 1.54184                                                                           | 1.54184                                                           | 1.54184                                                          |
| Crystal system                                        | triclinic                                                                         | monoclinic                                                                        | monoclinic                                                        | monoclinic                                                       |
| Space group                                           | P-1                                                                               | P2 <sub>1</sub> /m                                                                | P2 <sub>1</sub> /c                                                | P2 <sub>1</sub> /c                                               |
| a (Å)                                                 | 9.7087(3)                                                                         | 9.8098(2)                                                                         | 10.4196(2)                                                        | 10.3863(2)                                                       |
| b (Å)                                                 | 12.5412(3)                                                                        | 17.0515(2)                                                                        | 7.59630(10)                                                       | 15.2158(2)                                                       |
| c (Å)                                                 | 15.1640(3)                                                                        | 10.0380(2)                                                                        | 22.2930(5)                                                        | 14.1625(3)                                                       |
| α (°)                                                 | 77.201(2)                                                                         | 90                                                                                | 90                                                                | 90                                                               |
| β (°)                                                 | 77.009(2)                                                                         | 110.109(2)                                                                        | 99.888(2)                                                         | 105.698(2)                                                       |
| γ (°)                                                 | 73.293(2)                                                                         | 90                                                                                | 90                                                                | 90                                                               |
| V (Å <sup>3</sup> )                                   | 1698.62(8)                                                                        | 1576.72(5)                                                                        | 1738.29(6)                                                        | 2154.70(7)                                                       |
| Z                                                     | 2                                                                                 | 2                                                                                 | 4                                                                 | 4                                                                |
| ρ <sub>calc</sub> (g cm <sup>-3</sup> )               | 1.447                                                                             | 1.803                                                                             | 1.800                                                             | 1.530                                                            |
| μ (mm <sup>-1</sup> )                                 | 5.846                                                                             | 9.257                                                                             | 8.240                                                             | 5.721                                                            |
| F (000)                                               | 748.0                                                                             | 836.0                                                                             | 928.0                                                             | 1000.0                                                           |
| Crystal dimensions (mm <sup>3</sup> )                 | 0.155 × 0.087 × 0.05                                                              | 0.183 × 0.1 × 0.072                                                               | 0.392 × 0.157 × 0.078                                             | 0.226 × 0.157 × 0.067                                            |
| 2θ max (°)                                            | 147.708                                                                           | 147.818                                                                           | 147.606                                                           | 147.63                                                           |
| Reflections collected                                 | 38991                                                                             | 15522                                                                             | 16939                                                             | 20876                                                            |
| Independent reflections                               | 6767                                                                              | 3261                                                                              | 3462                                                              | 4284                                                             |
| Parameters refined                                    | 344                                                                               | 176                                                                               | 181                                                               | 241                                                              |
| Final R indexes [I <sub>0</sub> >2σ(I <sub>0</sub> )] | R <sub>1</sub> = 0.0288, wR <sub>2</sub> = 0.0678                                 | R <sub>1</sub> = 0.0320, wR <sub>2</sub> = 0.0747                                 | R <sub>1</sub> = 0.0464, wR <sub>2</sub> = 0.1131                 | R <sub>1</sub> = 0.0269, wR <sub>2</sub> = 0.0653                |
| R indexes (all data)                                  | R <sub>1</sub> = 0.0344, wR <sub>2</sub> = 0.0706                                 | R <sub>1</sub> = 0.0353, wR <sub>2</sub> = 0.0764                                 | R <sub>1</sub> = 0.0474, wR <sub>2</sub> = 0.1137                 | R <sub>1</sub> = 0.0322, wR <sub>2</sub> = 0.0679                |
| Goodness-of-fit on F <sup>2</sup>                     | 1.044                                                                             | 1.102                                                                             | 1.153                                                             | 1.080                                                            |

|                                                       | <b>[(Br<sub>2</sub>)·S(SIMes)]</b>                                                            | <b>[S(Br)·(IPr<sup>Me</sup>)]Br<sub>3</sub></b>                  | <b>[S(Br)·(ICy)]Br</b>                                           |
|-------------------------------------------------------|-----------------------------------------------------------------------------------------------|------------------------------------------------------------------|------------------------------------------------------------------|
| CCDC no.                                              | 2121850                                                                                       | 2121851                                                          | 2121852                                                          |
| Empirical formula                                     | C <sub>43</sub> H <sub>54</sub> Br <sub>4</sub> Cl <sub>2</sub> N <sub>4</sub> S <sub>2</sub> | C <sub>29</sub> H <sub>40</sub> Br <sub>4</sub> N <sub>2</sub> S | C <sub>15</sub> H <sub>24</sub> Br <sub>2</sub> N <sub>2</sub> S |
| Formula weight (g mol <sup>-1</sup> )                 | 1081.52                                                                                       | 768.29                                                           | 424.22                                                           |
| T (K)                                                 | 100                                                                                           | 100                                                              | 100                                                              |
| λ (Å)                                                 | 1.54184                                                                                       | 1.54184                                                          | 1.54184                                                          |
| Crystal system                                        | monoclinic                                                                                    | monoclinic                                                       | monoclinic                                                       |
| Space group                                           | P2/c                                                                                          | P2 <sub>1</sub> /m                                               | P2 <sub>1</sub> /c                                               |
| a (Å)                                                 | 20.8862(5)                                                                                    | 9.7651(2)                                                        | 10.4976(9)                                                       |
| b (Å)                                                 | 8.13980(10)                                                                                   | 16.9691(3)                                                       | 7.4915(5)                                                        |
| c (Å)                                                 | 13.9252(2)                                                                                    | 10.1288(2)                                                       | 22.3272(17)                                                      |
| α (°)                                                 | 90                                                                                            | 90                                                               | 90                                                               |
| β (°)                                                 | 100.044(2)                                                                                    | 110.132(2)                                                       | 101.384(8)                                                       |
| γ (°)                                                 | 90                                                                                            | 90                                                               | 90                                                               |
| V (Å <sup>3</sup> )                                   | 2331.13(7)                                                                                    | 1575.85(6)                                                       | 1721.3(2)                                                        |
| Z                                                     | 2                                                                                             | 2                                                                | 4                                                                |
| ρ <sub>calc</sub> (g cm <sup>-3</sup> )               | 1.541                                                                                         | 1.619                                                            | 1.637                                                            |
| μ (mm <sup>-1</sup> )                                 | 6.367                                                                                         | 6.999                                                            | 7.037                                                            |
| F (000)                                               | 1092.0                                                                                        | 768.0                                                            | 856.0                                                            |
| Crystal dimensions (mm <sup>3</sup> )                 | 0.251 × 0.139 × 0.071                                                                         | 0.116 × 0.081 × 0.062                                            | 0.221 × 0.134 × 0.079                                            |
| 2θ max (°)                                            | 147.832                                                                                       | 147.572                                                          | 148.522                                                          |
| Reflections collected                                 | 22608                                                                                         | 15068                                                            | 13193                                                            |
| Independent reflections                               | 4645                                                                                          | 3254                                                             | 3409                                                             |
| Parameters refined                                    | 255                                                                                           | 177                                                              | 181                                                              |
| Final R indexes [I <sub>0</sub> >2σ(I <sub>0</sub> )] | R <sub>1</sub> = 0.0364, wR <sub>2</sub> = 0.0931                                             | R <sub>1</sub> = 0.0355, wR <sub>2</sub> = 0.0880                | R <sub>1</sub> = 0.0609, wR <sub>2</sub> = 0.1548                |
| R indexes (all data)                                  | R <sub>1</sub> = 0.0451, wR <sub>2</sub> = 0.1002                                             | R <sub>1</sub> = 0.0420, wR <sub>2</sub> = 0.0915                | R <sub>1</sub> = 0.0800, wR <sub>2</sub> = 0.1775                |
| Goodness-of-fit on F <sup>2</sup>                     | 1.025                                                                                         | 1.059                                                            | 1.020                                                            |

|                                                       | <b>[SeCl<sub>2</sub>(IPr)]</b>                                    | <b>[SeCl<sub>2</sub>(SIPr)]</b>                                   | <b>[SeCl<sub>2</sub>(SIMes)]</b>                                  | <b>[SeCl<sub>2</sub>(IPr*)]</b>                                   | <b>[SIMes-Cl]HSO<sub>4</sub></b>                                  |
|-------------------------------------------------------|-------------------------------------------------------------------|-------------------------------------------------------------------|-------------------------------------------------------------------|-------------------------------------------------------------------|-------------------------------------------------------------------|
| CCDC no.                                              | 2121853                                                           | 2121854                                                           | 2121855                                                           | 2121856                                                           | 2121857                                                           |
| Empirical formula                                     | C <sub>27</sub> H <sub>36</sub> Cl <sub>2</sub> N <sub>2</sub> Se | C <sub>27</sub> H <sub>38</sub> Cl <sub>2</sub> N <sub>2</sub> Se | C <sub>21</sub> H <sub>26</sub> Cl <sub>2</sub> N <sub>2</sub> Se | C <sub>69</sub> H <sub>56</sub> Cl <sub>2</sub> N <sub>2</sub> Se | C <sub>21</sub> H <sub>27</sub> ClN <sub>2</sub> O <sub>4</sub> S |
| Formula weight (g mol <sup>-1</sup> )                 | 538.44                                                            | 540.45                                                            | 456.30                                                            | 1063.02                                                           | 438.95                                                            |
| T (K)                                                 | 100                                                               | 100                                                               | 100                                                               | 100                                                               | 100                                                               |
| λ (Å)                                                 | 1.54184                                                           | 1.54184                                                           | 1.54184                                                           | 1.54184                                                           | 1.54184                                                           |
| Crystal system                                        | tetragonal                                                        | orthorhombic                                                      | monoclinic                                                        | triclinic                                                         | triclinic                                                         |
| Space group                                           | P4 <sub>3</sub> 2 <sub>1</sub> 2                                  | Pbca                                                              | P2 <sub>1</sub> /n                                                | P-1                                                               | P-1                                                               |
| a (Å)                                                 | 14.07600(10)                                                      | 19.3439(3)                                                        | 7.3535(2)                                                         | 10.5501(4)                                                        | 11.7200(7)                                                        |
| b (Å)                                                 | 14.07600(10)                                                      | 12.9998(2)                                                        | 15.3563(4)                                                        | 13.3094(5)                                                        | 13.2714(8)                                                        |
| c (Å)                                                 | 13.5004(2)                                                        | 21.4322(4)                                                        | 18.1591(4)                                                        | 21.9568(9)                                                        | 15.9571(8)                                                        |
| α (°)                                                 | 90                                                                | 90                                                                | 90                                                                | 104.727(3)                                                        | 78.387(5)                                                         |
| β (°)                                                 | 90                                                                | 90                                                                | 92.485(2)                                                         | 92.152(3)                                                         | 74.490(5)                                                         |
| γ (°)                                                 | 90                                                                | 90                                                                | 90                                                                | 96.504(3)                                                         | 66.020(6)                                                         |
| V (Å <sup>3</sup> )                                   | 2674.89(5)                                                        | 5389.49(15)                                                       | 2048.64(9)                                                        | 2955.5(2)                                                         | 2173.0(2)                                                         |
| Z                                                     | 4                                                                 | 8                                                                 | 4                                                                 | 2                                                                 | 4                                                                 |
| ρ <sub>calc</sub> (g cm <sup>-3</sup> )               | 1.337                                                             | 1.332                                                             | 1.479                                                             | 1.194                                                             | 1.342                                                             |
| μ (mm <sup>-1</sup> )                                 | 3.855                                                             | 3.826                                                             | 4.926                                                             | 2.001                                                             | 2.702                                                             |
| F (000)                                               | 1120.0                                                            | 2256.0                                                            | 936.0                                                             | 1104.0                                                            | 928.0                                                             |
| Crystal dimensions (mm <sup>3</sup> )                 | 0.179 × 0.118 × 0.088                                             | 0.27 × 0.157 × 0.084                                              | 0.127 × 0.088 × 0.04                                              | 0.132 × 0.097 × 0.064                                             | 0.128 × 0.085 × 0.054                                             |
| 2θ max (°)                                            | 147.576                                                           | 147.81                                                            | 147.444                                                           | 148.022                                                           | 147.664                                                           |
| Reflections collected                                 | 13122                                                             | 26447                                                             | 19695                                                             | 42669                                                             | 32389                                                             |
| Independent reflections                               | 2688                                                              | 5362                                                              | 4089                                                              | 11737                                                             | 8649                                                              |
| Parameters refined                                    | 150                                                               | 297                                                               | 241                                                               | 669                                                               | 537                                                               |
| Final R indexes [I <sub>0</sub> >2σ(I <sub>0</sub> )] | R <sub>1</sub> = 0.0295, wR <sub>2</sub> = 0.0654                 | R <sub>1</sub> = 0.0443, wR <sub>2</sub> = 0.1065                 | R <sub>1</sub> = 0.0471, wR <sub>2</sub> = 0.1113                 | R <sub>1</sub> = 0.0674, wR <sub>2</sub> = 0.1660                 | R <sub>1</sub> = 0.0514, wR <sub>2</sub> = 0.0976                 |
| R indexes (all data)                                  | R <sub>1</sub> = 0.0353, wR <sub>2</sub> = 0.0680                 | R <sub>1</sub> = 0.0550, wR <sub>2</sub> = 0.1158                 | R <sub>1</sub> = 0.0631, wR <sub>2</sub> = 0.1187                 | R <sub>1</sub> = 0.0837, wR <sub>2</sub> = 0.1772                 | R <sub>1</sub> = 0.0912, wR <sub>2</sub> = 0.1141                 |
| Goodness-of-fit on F <sup>2</sup>                     | 1.043                                                             | 1.040                                                             | 1.109                                                             | 1.044                                                             | 0.992                                                             |

|                                                       | <b>[I<sub>2</sub>·Se(IPr)]</b>                                                   | <b>[I<sub>2</sub>·Se(IMes)]</b>                                  | <b>[I<sub>2</sub>·Se(SIMes)]</b>                                 | <b>[I<sub>2</sub>·Se(IPr<sup>Cl</sup>)]</b>                                      | <b>[(Se(SIPr))<sub>2</sub>(μ-I)]<sub>5</sub></b>                                              |
|-------------------------------------------------------|----------------------------------------------------------------------------------|------------------------------------------------------------------|------------------------------------------------------------------|----------------------------------------------------------------------------------|-----------------------------------------------------------------------------------------------|
| CCDC no.                                              | 2121858                                                                          | 2121859                                                          | 2121860                                                          | 2121861                                                                          | 2121862                                                                                       |
| Empirical formula                                     | C <sub>28</sub> H <sub>38</sub> Cl <sub>2</sub> I <sub>2</sub> N <sub>2</sub> Se | C <sub>21</sub> H <sub>24</sub> I <sub>2</sub> N <sub>2</sub> Se | C <sub>21</sub> H <sub>26</sub> I <sub>2</sub> N <sub>2</sub> Se | C <sub>27</sub> H <sub>34</sub> Cl <sub>2</sub> I <sub>2</sub> N <sub>2</sub> Se | C <sub>55</sub> H <sub>78</sub> Cl <sub>2</sub> I <sub>6</sub> N <sub>4</sub> Se <sub>2</sub> |
| Formula weight (g mol <sup>-1</sup> )                 | 806.26                                                                           | 637.18                                                           | 639.20                                                           | 790.22                                                                           | 1785.44                                                                                       |
| T (K)                                                 | 100                                                                              | 100                                                              | 100                                                              | 100                                                                              | 100                                                                                           |
| λ (Å)                                                 | 1.54184                                                                          | 1.54184                                                          | 1.54184                                                          | 1.54184                                                                          | 1.54184                                                                                       |
| Crystal system                                        | monoclinic                                                                       | monoclinic                                                       | monoclinic                                                       | triclinic                                                                        | monoclinic                                                                                    |
| Space group                                           | P2 <sub>1</sub> /n                                                               | P2 <sub>1</sub> /n                                               | C2/c                                                             | P-1                                                                              | P2 <sub>1</sub> /n                                                                            |
| a (Å)                                                 | 10.7433(2)                                                                       | 7.4915(2)                                                        | 30.1615(4)                                                       | 8.6805(2)                                                                        | 10.67600(10)                                                                                  |
| b (Å)                                                 | 18.7344(2)                                                                       | 15.8395(5)                                                       | 44.2672(7)                                                       | 10.5911(2)                                                                       | 32.7882(2)                                                                                    |
| c (Å)                                                 | 16.2982(2)                                                                       | 19.5337(5)                                                       | 18.8321(3)                                                       | 18.1694(4)                                                                       | 18.84640(10)                                                                                  |
| α (°)                                                 | 90                                                                               | 90                                                               | 90                                                               | 74.003(2)                                                                        | 90                                                                                            |
| β (°)                                                 | 102.6540(10)                                                                     | 95.970(3)                                                        | 97.730(2)                                                        | 89.506(2)                                                                        | 90.7280(10)                                                                                   |
| γ (°)                                                 | 90                                                                               | 90                                                               | 90                                                               | 73.080(2)                                                                        | 90                                                                                            |
| V (Å <sup>3</sup> )                                   | 3200.65(8)                                                                       | 2305.33(11)                                                      | 24915.5(7)                                                       | 1531.57(6)                                                                       | 6596.59(8)                                                                                    |
| Z                                                     | 4                                                                                | 4                                                                | 40                                                               | 2                                                                                | 4                                                                                             |
| ρ <sub>calc</sub> (g cm <sup>-3</sup> )               | 1.673                                                                            | 1.836                                                            | 1.704                                                            | 1.714                                                                            | 1.798                                                                                         |
| μ (mm <sup>-1</sup> )                                 | 18.405                                                                           | 23.276                                                           | 21.537                                                           | 19.219                                                                           | 24.459                                                                                        |
| F (000)                                               | 1576.0                                                                           | 1216.0                                                           | 12240.0                                                          | 768.0                                                                            | 3424.0                                                                                        |
| Crystal dimensions (mm <sup>3</sup> )                 | 0.166 × 0.087 × 0.078                                                            | 0.077 × 0.065 × 0.049                                            | 0.184 × 0.11 × 0.068                                             | 0.254 × 0.119 × 0.088                                                            | 0.277 × 0.201 × 0.103                                                                         |
| 2θ max (°)                                            | 147.838                                                                          | 147.69                                                           | 148.646                                                          | 147.546                                                                          | 147.812                                                                                       |
| Reflections collected                                 | 36795                                                                            | 17618                                                            | 119022                                                           | 23063                                                                            | 41544                                                                                         |
| Independent reflections                               | 6397                                                                             | 4617                                                             | 24869                                                            | 6085                                                                             | 12790                                                                                         |
| Parameters refined                                    | 324                                                                              | 241                                                              | 1201                                                             | 315                                                                              | 638                                                                                           |
| Final R indexes [I <sub>0</sub> >2σ(I <sub>0</sub> )] | R <sub>1</sub> = 0.0350, wR <sub>2</sub> = 0.0886                                | R <sub>1</sub> = 0.0495, wR <sub>2</sub> = 0.0989                | R <sub>1</sub> = 0.0435, wR <sub>2</sub> = 0.0746                | R <sub>1</sub> = 0.0257, wR <sub>2</sub> = 0.0621                                | R <sub>1</sub> = 0.0404, wR <sub>2</sub> = 0.1016                                             |
| R indexes (all data)                                  | R <sub>1</sub> = 0.0408, wR <sub>2</sub> = 0.0933                                | R <sub>1</sub> = 0.0801, wR <sub>2</sub> = 0.1196                | R <sub>1</sub> = 0.0885, wR <sub>2</sub> = 0.0913                | R <sub>1</sub> = 0.0287, wR <sub>2</sub> = 0.0640                                | R <sub>1</sub> = 0.0448, wR <sub>2</sub> = 0.1054                                             |
| Goodness-of-fit on F <sup>2</sup>                     | 1.019                                                                            | 1.089                                                            | 0.948                                                            | 1.059                                                                            | 1.041                                                                                         |

|                                                       | <b>[SeI<sub>2</sub>(ICy)]</b>                                    | <b>[SeI(IPr<sup>Me</sup>)]I<sub>3</sub></b>                      | <b>[I<sub>2</sub>S(IPr*)]</b>                                   | <b>[I<sub>2</sub>S(IMes)]</b>                                   | <b>[I<sub>2</sub>S(ICy)]</b>                                                                 |
|-------------------------------------------------------|------------------------------------------------------------------|------------------------------------------------------------------|-----------------------------------------------------------------|-----------------------------------------------------------------|----------------------------------------------------------------------------------------------|
| CCDC no.                                              | 2121863                                                          | 2121864                                                          | 2121865                                                         | 2121866                                                         | 2121867                                                                                      |
| Empirical formula                                     | C <sub>15</sub> H <sub>24</sub> I <sub>2</sub> N <sub>2</sub> Se | C <sub>29</sub> H <sub>40</sub> I <sub>4</sub> N <sub>2</sub> Se | C <sub>69</sub> H <sub>56</sub> I <sub>2</sub> N <sub>2</sub> S | C <sub>21</sub> H <sub>24</sub> I <sub>2</sub> N <sub>2</sub> S | C <sub>31</sub> H <sub>50</sub> Cl <sub>2</sub> I <sub>4</sub> N <sub>4</sub> S <sub>2</sub> |
| Formula weight (g mol <sup>-1</sup> )                 | 565.12                                                           | 1003.19                                                          | 1199.02                                                         | 590.28                                                          | 1121.37                                                                                      |
| T (K)                                                 | 100                                                              | 100                                                              | 100                                                             | 100                                                             | 100                                                                                          |
| λ (Å)                                                 | 1.54184                                                          | 1.54184                                                          | 1.54184                                                         | 1.54184                                                         | 1.54184                                                                                      |
| Crystal system                                        | triclinic                                                        | monoclinic                                                       | monoclinic                                                      | monoclinic                                                      | monoclinic                                                                                   |
| Space group                                           | P-1                                                              | P2 <sub>1</sub> /m                                               | P2 <sub>1</sub> /c                                              | P2 <sub>1</sub> /c                                              | P2/n                                                                                         |
| a (Å)                                                 | 10.4570(4)                                                       | 10.2704(2)                                                       | 13.00810(10)                                                    | 12.55015(17)                                                    | 14.8192(6)                                                                                   |
| b (Å)                                                 | 11.6249(5)                                                       | 16.8187(3)                                                       | 17.9100(2)                                                      | 11.35537(12)                                                    | 9.6293(3)                                                                                    |
| c (Å)                                                 | 16.1590(7)                                                       | 10.5634(2)                                                       | 24.2237(2)                                                      | 15.8885(2)                                                      | 15.9429(6)                                                                                   |
| α (°)                                                 | 107.039(4)                                                       | 90                                                               | 90                                                              | 90                                                              | 90                                                                                           |
| β (°)                                                 | 101.991(3)                                                       | 110.816(2)                                                       | 93.0680(10)                                                     | 96.6229(11)                                                     | 117.447(5)                                                                                   |
| γ (°)                                                 | 91.225(3)                                                        | 90                                                               | 90                                                              | 90                                                              | 90                                                                                           |
| V (Å <sup>3</sup> )                                   | 1829.99(14)                                                      | 1705.56(6)                                                       | 5635.43(9)                                                      | 2249.19(5)                                                      | 2018.95(15)                                                                                  |
| Z                                                     | 4                                                                | 2                                                                | 4                                                               | 4                                                               | 2                                                                                            |
| ρ <sub>calc</sub> (g cm <sup>-3</sup> )               | 2.051                                                            | 1.953                                                            | 1.413                                                           | 1.743                                                           | 1.845                                                                                        |
| μ (mm <sup>-1</sup> )                                 | 29.205                                                           | 30.052                                                           | 9.437                                                           | 22.874                                                          | 26.621                                                                                       |
| F (000)                                               | 1072.0                                                           | 948.0                                                            | 2424.0                                                          | 1144.0                                                          | 1084.0                                                                                       |
| Crystal dimensions (mm <sup>3</sup> )                 | 0.123 × 0.082 × 0.049                                            | 0.09 × 0.068 × 0.039                                             | 0.14 × 0.119 × 0.08                                             | 0.1 × 0.087 × 0.067                                             | 0.14 × 0.111 × 0.054                                                                         |
| 2θ max (°)                                            | 148.124                                                          | 147.504                                                          | 147.826                                                         | 147.816                                                         | 147.894                                                                                      |
| Reflections collected                                 | 34175                                                            | 14762                                                            | 54281                                                           | 21875                                                           | 9337                                                                                         |
| Independent reflections                               | 7269                                                             | 3515                                                             | 11204                                                           | 4500                                                            | 3769                                                                                         |
| Parameters refined                                    | 361                                                              | 177                                                              | 669                                                             | 241                                                             | 195                                                                                          |
| Final R indexes [I <sub>0</sub> >2σ(I <sub>0</sub> )] | R <sub>1</sub> = 0.0409, wR <sub>2</sub> = 0.0973                | R <sub>1</sub> = 0.0451, wR <sub>2</sub> = 0.1197                | R <sub>1</sub> = 0.0346, wR <sub>2</sub> = 0.0840               | R <sub>1</sub> = 0.0234, wR <sub>2</sub> = 0.0487               | R <sub>1</sub> = 0.0561, wR <sub>2</sub> = 0.1573                                            |
| R indexes (all data)                                  | R <sub>1</sub> = 0.0546, wR <sub>2</sub> = 0.1059                | R <sub>1</sub> = 0.0542, wR <sub>2</sub> = 0.1263                | R <sub>1</sub> = 0.0494, wR <sub>2</sub> = 0.0916               | R <sub>1</sub> = 0.0313, wR <sub>2</sub> = 0.0518               | R <sub>1</sub> = 0.0669, wR <sub>2</sub> = 0.1686                                            |
| Goodness-of-fit on F <sup>2</sup>                     | 1.033                                                            | 1.084                                                            | 1.009                                                           | 1.002                                                           | 1.056                                                                                        |
